# Supplementary material for: Examining Short-Term Responses to a Long-Term Problem: RNA-Seq Analyses of Iron Deficiency Chlorosis Tolerant Soybean
Source: Int J Mol Sci. 2020 May 19;21(10):3591. doi: 10.3390/ijms21103591 (PMC7279018; doi:10.3390/ijms21103591)
Supplement: Supplementary file 1 [file ijms-21-03591-s001.xlsx]

## Sheet: TS1_Leaf30Min
Table S1. Genes significantly differentially expressed in leaves 30 minutes post iron stress. Glyma2.0 ID refers to Glycine max version 2.0 release, data is sorted by Glyma 2.0 ID. For more information see http://www.phytozome.net/soybean.php. The top A. thaliana hit (TAIR version 10) was determined by BLASTP of Glyma2.0 primary proteins against A. thaliana proteins (TAIR10, E<10-6). Gene ontolog…
Glyma 2.0 ID	Log 2 Fold Change (Deficient/Sufficient)	False Discovery Rate	Top Arabidopsis (TAIR10) BLASTP Hit (4)	E-value (E<10-6)	Gene Ontology Biological Process IDs	Gene Ontology Biological Process Descriptions
Glyma.02G023800	1.84331	6.49e-05	AT2G20142.1|Symbols:|Toll-Interleukin-Resistance (TIR) domain family protein|chr2:8695387-8696566 FORWARD LENGTH=313	5e-44	GO:0007165	signal transduction
Glyma.02G208200	1.77324	0.00114821	AT4G08950.1|Symbols:EXO|Phosphate-responsive 1 family protein|chr4:5740378-5741322 FORWARD LENGTH=314	2e-146	GO:0009741 GO:0016126	response to brassinosteroid stimulus; sterol biosynthetic process
Glyma.02G255400	2.33391	0.0072598	AT2G40000.1|Symbols:HSPRO2, ATHSPRO2|ortholog of sugar beet HS1 PRO-1 2|chr2:16700649-16701956 REVERSE LENGTH=435	3e-161	GO:0006979 GO:0009646 GO:0009751 GO:0009816 GO:0010200	defense response to bacterium, incompatible interaction; response to absence of light; response to chitin; response to oxidative stress; response to salicylic acid stimulus
Glyma.02G274400	2.17977	0.000112044	AT2G27080.2|Symbols:|Late embryogenesis abundant (LEA) hydroxyproline-rich glycoprotein family|chr2:11566383-11567165 FORWARD LENGTH=260	2e-95	GO:0008150	biological process
Glyma.02G296600	1.82712	1.9e-05	AT2G40140.2|Symbols:CZF1, ZFAR1, SZF2, ATSZF2|zinc finger (CCCH-type) family protein|chr2:16772537-16774330 FORWARD LENGTH=597	0	GO:0002679 GO:0006355 GO:0006612 GO:0006944 GO:0009409 GO:0009863 GO:0010200 GO:0010363 GO:0030968 GO:0035556 GO:0043069 GO:0050832	cellular membrane fusion; defense response to fungus; endoplasmic reticulum unfolded protein response; intracellular signal transduction; negative regulation of programmed cell death; protein targeting to membrane; regulation of plant-type hypersensitive response; regulation of transcription, DNA-dependent; respiratory burst involved in defense response; response to chitin; response to cold; sali…
Glyma.03G173300	5.02459	3.44e-08	AT2G37430.1|Symbols:|C2H2 and C2HC zinc fingers superfamily protein|chr2:15706454-15706990 FORWARD LENGTH=178	8e-35	GO:0002679 GO:0006355 GO:0009693 GO:0010200 GO:0035556	ethylene biosynthetic process; intracellular signal transduction; regulation of transcription, DNA-dependent; respiratory burst involved in defense response; response to chitin
Glyma.04G044900	2.39117	0.000336462	AT1G27730.1|Symbols:STZ, ZAT10|salt tolerance zinc finger|chr1:9648302-9648985 REVERSE LENGTH=227	6e-67	GO:0002679 GO:0006979 GO:0007165 GO:0009409 GO:0009414 GO:0009611 GO:0009612 GO:0009620 GO:0009644 GO:0009651 GO:0009695 GO:0009723 GO:0009733 GO:0009737 GO:0009738 GO:0009753 GO:0009873 GO:0010117 GO:0010200 GO:0015979 GO:0035264 GO:0035556 GO:0042538 GO:0045892	abscisic acid mediated signaling pathway; ethylene mediated signaling pathway; hyperosmotic salinity response; intracellular signal transduction; jasmonic acid biosynthetic process; multicellular organism growth; negative regulation of transcription, DNA-dependent; photoprotection; photosynthesis; respiratory burst involved in defense response; response to abscisic acid stimulus; response to auxi…
Glyma.04G100300	2.6689	0.00279657	AT4G08950.1|Symbols:EXO|Phosphate-responsive 1 family protein|chr4:5740378-5741322 FORWARD LENGTH=314	4e-142	GO:0009741 GO:0016126	response to brassinosteroid stimulus; sterol biosynthetic process
Glyma.05G063500	1.64051	0.00279657	AT5G47230.1|Symbols:ERF5, ATERF-5, ATERF5|ethylene responsive element binding factor 5|chr5:19180072-19180974 FORWARD LENGTH=300	5e-64	GO:0002679 GO:0006355 GO:0009409 GO:0009873 GO:0010200 GO:0035556 GO:0045893	ethylene mediated signaling pathway; intracellular signal transduction; positive regulation of transcription, DNA-dependent; regulation of transcription, DNA-dependent; respiratory burst involved in defense response; response to chitin; response to cold
Glyma.05G150100	3.35301	0.000526958	AT3G57450.1|Symbols:|unknown protein; Has 65 Blast hits to 65 proteins in 11 species: Archae - 0; Bacteria - 0; Metazoa - 0; Fungi - 0; Plants - 65; Viruses - 0; Other Eukaryotes - 0 (source: NCBI BLink).|chr3:21262028-21262318 FORWARD LENGTH=96	2e-16	GO:0008150 GO:0009611 GO:0009620 GO:0009695 GO:0009738 GO:0009753 GO:0010200 GO:0030968 GO:0035556	abscisic acid mediated signaling pathway; biological process; endoplasmic reticulum unfolded protein response; intracellular signal transduction; jasmonic acid biosynthetic process; response to chitin; response to fungus; response to jasmonic acid stimulus; response to wounding
Glyma.05G211700	2.55714	3.8e-05	AT3G61510.1|Symbols:ACS1, AT-ACS1|ACC synthase 1|chr3:22763495-22765730 REVERSE LENGTH=488	0	GO:0009058 GO:0009693 GO:0042218	1-aminocyclopropane-1-carboxylate biosynthetic process; biosynthetic process; ethylene biosynthetic process
Glyma.05G212300	1.89999	0.00185973	AT5G41590.1|Symbols:|Protein of unknown function (DUF567)|chr5:16632221-16633896 REVERSE LENGTH=221	1e-55	GO:0008150	biological process
Glyma.05G215900	2.52952	0.000280306	AT4G11070.1|Symbols:WRKY41, AtWRKY41|WRKY family transcription factor|chr4:6759303-6760763 FORWARD LENGTH=313	2e-71	GO:0006355	regulation of transcription, DNA-dependent
Glyma.06G045400	2.72145	9.77e-05	AT1G27730.1|Symbols:STZ, ZAT10|salt tolerance zinc finger|chr1:9648302-9648985 REVERSE LENGTH=227	1e-66	GO:0002679 GO:0006979 GO:0007165 GO:0009409 GO:0009414 GO:0009611 GO:0009612 GO:0009620 GO:0009644 GO:0009651 GO:0009695 GO:0009723 GO:0009733 GO:0009737 GO:0009738 GO:0009753 GO:0009873 GO:0010117 GO:0010200 GO:0015979 GO:0035264 GO:0035556 GO:0042538 GO:0045892	abscisic acid mediated signaling pathway; ethylene mediated signaling pathway; hyperosmotic salinity response; intracellular signal transduction; jasmonic acid biosynthetic process; multicellular organism growth; negative regulation of transcription, DNA-dependent; photoprotection; photosynthesis; respiratory burst involved in defense response; response to abscisic acid stimulus; response to auxi…
Glyma.06G099700	2.16307	0.000112044	AT4G40080.1|Symbols:|ENTH/ANTH/VHS superfamily protein|chr4:18579371-18580542 FORWARD LENGTH=365	2e-57	GO:0008150 GO:0010167 GO:0015706	biological process; nitrate transport; response to nitrate
Glyma.06G102000	3.13316	3.71e-06	AT4G08950.1|Symbols:EXO|Phosphate-responsive 1 family protein|chr4:5740378-5741322 FORWARD LENGTH=314	3e-147	GO:0009741 GO:0016126	response to brassinosteroid stimulus; sterol biosynthetic process
Glyma.06G135900	3.48505	0.00322058	AT5G54165.1|Symbols:|unknown protein; FUNCTIONS IN: molecular_function unknown; INVOLVED IN: biological_process unknown; LOCATED IN: cellular_component unknown; Has 30201 Blast hits to 17322 proteins in 780 species: Archae - 12; Bacteria - 1396; Metazoa - 17338; Fungi - 3422; Plants - 5037; Viruses - 0; Other Eukaryotes - 2996 (source: NCBI BLink).|chr5:21984620-21984868 FORWARD LENGTH=82	8e-10	GO:0008150	biological process
Glyma.08G018000	1.7533	0.00767857	AT4G11280.1|Symbols:ACS6, ATACS6|1-aminocyclopropane-1-carboxylic acid (acc) synthase 6|chr4:6864168-6865922 FORWARD LENGTH=495	0	GO:0006979 GO:0009058 GO:0009611 GO:0009612 GO:0009693 GO:0009723 GO:0009733 GO:0009737 GO:0009753 GO:0010200 GO:0042218 GO:0071281	1-aminocyclopropane-1-carboxylate biosynthetic process; biosynthetic process; cellular response to iron ion; ethylene biosynthetic process; response to abscisic acid stimulus; response to auxin stimulus; response to chitin; response to ethylene stimulus; response to jasmonic acid stimulus; response to mechanical stimulus; response to oxidative stress; response to wounding
Glyma.08G106900	2.65056	0.00185973	AT3G57450.1|Symbols:|unknown protein; Has 65 Blast hits to 65 proteins in 11 species: Archae - 0; Bacteria - 0; Metazoa - 0; Fungi - 0; Plants - 65; Viruses - 0; Other Eukaryotes - 0 (source: NCBI BLink).|chr3:21262028-21262318 FORWARD LENGTH=96	8e-17	GO:0008150 GO:0009611 GO:0009620 GO:0009695 GO:0009738 GO:0009753 GO:0010200 GO:0030968 GO:0035556	abscisic acid mediated signaling pathway; biological process; endoplasmic reticulum unfolded protein response; intracellular signal transduction; jasmonic acid biosynthetic process; response to chitin; response to fungus; response to jasmonic acid stimulus; response to wounding
Glyma.08G177200	1.59053	0.000261803	NA	NA	NA	NA
Glyma.09G042400	2.67236	4.76e-06	AT3G16720.1|Symbols:ATL2, TL2|TOXICOS EN LEVADURA 2|chr3:5692880-5693794 FORWARD LENGTH=304	5e-67	GO:0000165 GO:0002679 GO:0006612 GO:0006952 GO:0009595 GO:0009611 GO:0009612 GO:0009697 GO:0009814 GO:0009862 GO:0009867 GO:0010200 GO:0010310 GO:0010363 GO:0031348 GO:0035556 GO:0042742 GO:0043900 GO:0050832	MAPK cascade; defense response; defense response, incompatible interaction; defense response to bacterium; defense response to fungus; detection of biotic stimulus; intracellular signal transduction; jasmonic acid mediated signaling pathway; negative regulation of defense response; protein targeting to membrane; regulation of hydrogen peroxide metabolic process; regulation of multi-organism proce…
Glyma.09G072000	4.77169	1.62e-05	AT1G19210.1|Symbols:|Integrase-type DNA-binding superfamily protein|chr1:6626973-6627530 REVERSE LENGTH=185	4e-48	GO:0006355 GO:0010200	regulation of transcription, DNA-dependent; response to chitin
Glyma.10G079700	2.80661	0.00951447	AT2G35460.1|Symbols:|Late embryogenesis abundant (LEA) hydroxyproline-rich glycoprotein family|chr2:14905788-14906504 FORWARD LENGTH=238	2e-31	NA	NA
Glyma.10G118900	2.09625	3.93e-14	AT5G51190.1|Symbols:|Integrase-type DNA-binding superfamily protein|chr5:20800708-20801373 REVERSE LENGTH=221	2e-51	GO:0002679 GO:0006355 GO:0009611 GO:0009612 GO:0010200 GO:0035556	intracellular signal transduction; regulation of transcription, DNA-dependent; respiratory burst involved in defense response; response to chitin; response to mechanical stimulus; response to wounding
Glyma.10G119600	-7.16765	0.00951447	AT2G30070.1|Symbols:ATKT1, ATKT1P, ATKUP1, KUP1, KT1|potassium transporter 1|chr2:12835097-12838466 FORWARD LENGTH=712	9e-129	GO:0006813 GO:0071805	potassium ion transmembrane transport; potassium ion transport
Glyma.10G119700	-7.53225	0.00758578	AT2G01910.2|Symbols:ATMAP65-6, MAP65-6|Microtubule associated protein (MAP65/ASE1) family protein|chr2:417698-420182 FORWARD LENGTH=567	7e-30	GO:0000226 GO:0007020 GO:0051322	anaphase; microtubule cytoskeleton organization; microtubule nucleation
Glyma.10G179400	1.17383	0.00084182	AT2G26640.1|Symbols:KCS11|3-ketoacyl-CoA synthase 11|chr2:11330094-11331623 FORWARD LENGTH=509	0	GO:0006084 GO:0006633 GO:0006816 GO:0007030 GO:0008152 GO:0008610 GO:0009409 GO:0009416 GO:0009651 GO:0009832 GO:0016049 GO:0016126 GO:0016132 GO:0030243	Golgi organization; acetyl-CoA metabolic process; brassinosteroid biosynthetic process; calcium ion transport; cell growth; cellulose metabolic process; fatty acid biosynthetic process; lipid biosynthetic process; metabolic process; plant-type cell wall biogenesis; response to cold; response to light stimulus; response to salt stress; sterol biosynthetic process
Glyma.10G266300	3.32018	1.37e-06	AT3G03280.1|Symbols:|unknown protein; FUNCTIONS IN: molecular_function unknown; INVOLVED IN: N-terminal protein myristoylation; LOCATED IN: cellular_component unknown; BEST Arabidopsis thaliana protein match is: unknown protein (TAIR:AT5G17350.1); Has 137 Blast hits to 137 proteins in 11 species: Archae - 0; Bacteria - 0; Metazoa - 0; Fungi - 0; Plants - 137; Viruses - 0; Other Eukaryotes - 0 (so…	1e-33	GO:0006499	N-terminal protein myristoylation
Glyma.11G036400	2.60412	0.000799922	AT5G47230.1|Symbols:ERF5, ATERF-5, ATERF5|ethylene responsive element binding factor 5|chr5:19180072-19180974 FORWARD LENGTH=300	3e-64	GO:0002679 GO:0006355 GO:0009409 GO:0009873 GO:0010200 GO:0035556 GO:0045893	ethylene mediated signaling pathway; intracellular signal transduction; positive regulation of transcription, DNA-dependent; regulation of transcription, DNA-dependent; respiratory burst involved in defense response; response to chitin; response to cold
Glyma.11G137300	3.02087	9.01e-17	AT5G59550.1|Symbols:|zinc finger (C3HC4-type RING finger) family protein|chr5:23998422-23999645 REVERSE LENGTH=407	3e-93	GO:0002679 GO:0009414 GO:0009693 GO:0009737 GO:0009873 GO:0010200 GO:0030968 GO:0035556 GO:0051865	endoplasmic reticulum unfolded protein response; ethylene biosynthetic process; ethylene mediated signaling pathway; intracellular signal transduction; protein autoubiquitination; respiratory burst involved in defense response; response to abscisic acid stimulus; response to chitin; response to water deprivation
Glyma.11G144600	2.23826	0.00438988	AT5G59730.2|Symbols:ATEXO70H7, EXO70H7|exocyst subunit exo70 family protein H7|chr5:24064096-24066004 REVERSE LENGTH=632	0	GO:0006887 GO:0006904	exocytosis; vesicle docking involved in exocytosis
Glyma.11G180500	2.27572	3.42e-07	AT5G22250.1|Symbols:|Polynucleotidyl transferase, ribonuclease H-like superfamily protein|chr5:7365605-7366441 REVERSE LENGTH=278	1e-136	GO:0000165 GO:0000289 GO:0002679 GO:0009451 GO:0009693 GO:0009738 GO:0009814 GO:0009873 GO:0010200 GO:0010228 GO:0035556 GO:0042742	MAPK cascade; RNA modification; abscisic acid mediated signaling pathway; defense response, incompatible interaction; defense response to bacterium; ethylene biosynthetic process; ethylene mediated signaling pathway; intracellular signal transduction; nuclear-transcribed mRNA poly(A) tail shortening; respiratory burst involved in defense response; response to chitin; vegetative to reproductive ph…
Glyma.11G214500	3.22363	3.45e-06	AT1G66160.1|Symbols:ATCMPG1, CMPG1|CYS, MET, PRO, and GLY protein 1|chr1:24637218-24638513 FORWARD LENGTH=431	9e-121	GO:0002679 GO:0010200 GO:0015824 GO:0016567 GO:0035556	intracellular signal transduction; proline transport; protein ubiquitination; respiratory burst involved in defense response; response to chitin
Glyma.12G093100	2.38892	4.9e-06	AT3G44260.1|Symbols:|Polynucleotidyl transferase, ribonuclease H-like superfamily protein|chr3:15952213-15953055 REVERSE LENGTH=280	3e-134	GO:0000289 GO:0002213 GO:0009451 GO:0009611 GO:0009612 GO:0009693 GO:0009873 GO:0010200 GO:0010228 GO:0042742	RNA modification; defense response to bacterium; defense response to insect; ethylene biosynthetic process; ethylene mediated signaling pathway; nuclear-transcribed mRNA poly(A) tail shortening; response to chitin; response to mechanical stimulus; response to wounding; vegetative to reproductive phase transition of meristem
Glyma.12G117000	1.40368	0.00163842	AT5G44210.1|Symbols:ERF9, ATERF9, ATERF-9|erf domain protein 9|chr5:17806742-17807344 FORWARD LENGTH=200	1e-47	GO:0006355 GO:0006857 GO:0009873 GO:0045892	ethylene mediated signaling pathway; negative regulation of transcription, DNA-dependent; oligopeptide transport; regulation of transcription, DNA-dependent
Glyma.12G226600	2.0013	7.21e-07	AT3G15210.1|Symbols:ATERF-4, ERF4, RAP2.5, ATERF4|ethylene responsive element binding factor 4|chr3:5121472-5122140 FORWARD LENGTH=222	1e-47	GO:0002679 GO:0006355 GO:0009723 GO:0009737 GO:0009864 GO:0010105 GO:0010200 GO:0035556 GO:0045892	induced systemic resistance, jasmonic acid mediated signaling pathway; intracellular signal transduction; negative regulation of ethylene mediated signaling pathway; negative regulation of transcription, DNA-dependent; regulation of transcription, DNA-dependent; respiratory burst involved in defense response; response to abscisic acid stimulus; response to chitin; response to ethylene stimulus
Glyma.13G067900	3.0998	0.00012378	AT1G70090.2|Symbols:GATL9, LGT8|glucosyl transferase family 8|chr1:26400927-26402099 FORWARD LENGTH=390	8e-163	GO:0016051	carbohydrate biosynthetic process
Glyma.13G095100	3.30927	0.00110352	AT4G25810.1|Symbols:XTR6, XTH23|xyloglucan endotransglycosylase 6|chr4:13128694-13129715 FORWARD LENGTH=286	6e-52	GO:0005975 GO:0006073	carbohydrate metabolic process; cellular glucan metabolic process
Glyma.13G112400	5.62343	2.41e-07	AT1G19210.1|Symbols:|Integrase-type DNA-binding superfamily protein|chr1:6626973-6627530 REVERSE LENGTH=185	9e-55	GO:0006355 GO:0010200	regulation of transcription, DNA-dependent; response to chitin
Glyma.13G236500	1.48116	0.00582613	AT5G44210.1|Symbols:ERF9, ATERF9, ATERF-9|erf domain protein 9|chr5:17806742-17807344 FORWARD LENGTH=200	2e-38	GO:0006355 GO:0006857 GO:0009873 GO:0045892	ethylene mediated signaling pathway; negative regulation of transcription, DNA-dependent; oligopeptide transport; regulation of transcription, DNA-dependent
Glyma.13G283600	2.53151	3.42e-07	AT5G54490.1|Symbols:PBP1|pinoid-binding protein 1|chr5:22121458-22121841 FORWARD LENGTH=127	5e-47	GO:0007165 GO:0009414 GO:0009693 GO:0009723 GO:0009733 GO:0009737 GO:0009738 GO:0009753 GO:0010583 GO:0042538	abscisic acid mediated signaling pathway; ethylene biosynthetic process; hyperosmotic salinity response; response to abscisic acid stimulus; response to auxin stimulus; response to cyclopentenone; response to ethylene stimulus; response to jasmonic acid stimulus; response to water deprivation; signal transduction
Glyma.14G016300	1.9458	7.94e-09	AT2G40140.2|Symbols:CZF1, ZFAR1, SZF2, ATSZF2|zinc finger (CCCH-type) family protein|chr2:16772537-16774330 FORWARD LENGTH=597	0	GO:0002679 GO:0006355 GO:0006612 GO:0006944 GO:0009409 GO:0009863 GO:0010200 GO:0010363 GO:0030968 GO:0035556 GO:0043069 GO:0050832	cellular membrane fusion; defense response to fungus; endoplasmic reticulum unfolded protein response; intracellular signal transduction; negative regulation of programmed cell death; protein targeting to membrane; regulation of plant-type hypersensitive response; regulation of transcription, DNA-dependent; respiratory burst involved in defense response; response to chitin; response to cold; sali…
Glyma.14G041700	2.5154	0.000106223	AT2G27080.2|Symbols:|Late embryogenesis abundant (LEA) hydroxyproline-rich glycoprotein family|chr2:11566383-11567165 FORWARD LENGTH=260	2e-98	GO:0008150	biological process
Glyma.14G195200	2.3875	7.67e-07	AT2G30020.1|Symbols:|Protein phosphatase 2C family protein|chr2:12814437-12815904 FORWARD LENGTH=396	2e-163	GO:0006470 GO:0009611 GO:0009620 GO:0009738 GO:0050832	abscisic acid mediated signaling pathway; defense response to fungus; protein dephosphorylation; response to fungus; response to wounding
Glyma.14G220400	0.898196	0.00973791	AT1G75860.1|Symbols:|unknown protein; BEST Arabidopsis thaliana protein match is: unknown protein (TAIR:AT1G20100.1); Has 258 Blast hits to 235 proteins in 58 species: Archae - 0; Bacteria - 4; Metazoa - 59; Fungi - 16; Plants - 90; Viruses - 0; Other Eukaryotes - 89 (source: NCBI BLink).|chr1:28484255-28485743 REVERSE LENGTH=297	6e-07	GO:0008150	biological process
Glyma.15G180000	5.29276	4.36e-10	AT1G19210.1|Symbols:|Integrase-type DNA-binding superfamily protein|chr1:6626973-6627530 REVERSE LENGTH=185	3e-49	GO:0006355 GO:0010200	regulation of transcription, DNA-dependent; response to chitin
Glyma.16G101900	-4.40165	0.0015682	AT1G71790.1|Symbols:|Subunits of heterodimeric actin filament capping protein Capz superfamily|chr1:26996869-26998785 FORWARD LENGTH=256	6e-18	GO:0007015 GO:0009408 GO:0030036 GO:0051693	actin cytoskeleton organization; actin filament capping; actin filament organization; response to heat
Glyma.16G137600	1.65509	2.89e-05	AT5G17680.1|Symbols:|disease resistance protein (TIR-NBS-LRR class), putative|chr5:5822999-5827153 FORWARD LENGTH=1294	4e-136	GO:0006952 GO:0007165	defense response; signal transduction
Glyma.16G178400	2.35861	0.0015682	AT1G01490.2|Symbols:|Heavy metal transport/detoxification superfamily protein|chr1:180401-182066 REVERSE LENGTH=177	5e-20	GO:0030001	metal ion transport
Glyma.17G030700	1.53716	0.00165618	AT4G16120.1|Symbols:ATSEB1, COBL7, SEB1|COBRA-like protein-7 precursor|chr4:9116591-9119138 REVERSE LENGTH=661	0	GO:0008150	biological process
Glyma.17G047300	5.28104	9.69e-05	AT1G19210.1|Symbols:|Integrase-type DNA-binding superfamily protein|chr1:6626973-6627530 REVERSE LENGTH=185	6e-59	GO:0006355 GO:0010200	regulation of transcription, DNA-dependent; response to chitin
Glyma.17G065000	2.80273	3.01e-05	AT3G23730.1|Symbols:XTH16|xyloglucan endotransglucosylase/hydrolase 16|chr3:8550222-8551248 FORWARD LENGTH=291	4e-138	GO:0005975 GO:0006073	carbohydrate metabolic process; cellular glucan metabolic process
Glyma.17G065200	2.69991	3.71e-06	AT4G25810.1|Symbols:XTR6, XTH23|xyloglucan endotransglycosylase 6|chr4:13128694-13129715 FORWARD LENGTH=286	3e-156	GO:0005975 GO:0006073	carbohydrate metabolic process; cellular glucan metabolic process
Glyma.17G065300	3.94402	1.4e-11	AT4G25810.1|Symbols:XTR6, XTH23|xyloglucan endotransglycosylase 6|chr4:13128694-13129715 FORWARD LENGTH=286	1e-156	GO:0005975 GO:0006073	carbohydrate metabolic process; cellular glucan metabolic process
Glyma.17G145300	1.55305	6.49e-05	AT5G47230.1|Symbols:ERF5, ATERF-5, ATERF5|ethylene responsive element binding factor 5|chr5:19180072-19180974 FORWARD LENGTH=300	2e-64	GO:0002679 GO:0006355 GO:0009409 GO:0009873 GO:0010200 GO:0035556 GO:0045893	ethylene mediated signaling pathway; intracellular signal transduction; positive regulation of transcription, DNA-dependent; regulation of transcription, DNA-dependent; respiratory burst involved in defense response; response to chitin; response to cold
Glyma.18G041400	1.97983	6.49e-05	AT1G66180.1|Symbols:|Eukaryotic aspartyl protease family protein|chr1:24647221-24648513 FORWARD LENGTH=430	0	GO:0006508 GO:0009416 GO:0016126 GO:0033591 GO:0052541 GO:0052546	cell wall pectin metabolic process; plant-type cell wall cellulose metabolic process; proteolysis; response to L-ascorbic acid; response to light stimulus; sterol biosynthetic process
Glyma.18G042100	3.70179	7.98e-06	AT5G37490.1|Symbols:|ARM repeat superfamily protein|chr5:14887744-14889051 FORWARD LENGTH=435	2e-122	GO:0002679 GO:0009693 GO:0010200 GO:0016567 GO:0035556	ethylene biosynthetic process; intracellular signal transduction; protein ubiquitination; respiratory burst involved in defense response; response to chitin
Glyma.19G029700	-3.01289	0.000366665	AT3G02100.1|Symbols:|UDP-Glycosyltransferase superfamily protein|chr3:368840-370484 REVERSE LENGTH=464	3e-125	GO:0008152	metabolic process
Glyma.19G174200	5.38922	5.37e-05	AT2G37430.1|Symbols:|C2H2 and C2HC zinc fingers superfamily protein|chr2:15706454-15706990 FORWARD LENGTH=178	6e-32	GO:0002679 GO:0006355 GO:0009693 GO:0010200 GO:0035556	ethylene biosynthetic process; intracellular signal transduction; regulation of transcription, DNA-dependent; respiratory burst involved in defense response; response to chitin
Glyma.19G199300	4.57139	1.73e-11	AT3G52450.1|Symbols:PUB22|plant U-box 22|chr3:19440943-19442250 REVERSE LENGTH=435	2e-169	GO:0002679 GO:0006865 GO:0006952 GO:0009414 GO:0010200 GO:0015824 GO:0016567 GO:0051865	amino acid transport; defense response; proline transport; protein autoubiquitination; protein ubiquitination; respiratory burst involved in defense response; response to chitin; response to water deprivation
Glyma.19G200200	4.18652	2.19e-10	AT3G52450.1|Symbols:PUB22|plant U-box 22|chr3:19440943-19442250 REVERSE LENGTH=435	1e-168	GO:0002679 GO:0006865 GO:0006952 GO:0009414 GO:0010200 GO:0015824 GO:0016567 GO:0051865	amino acid transport; defense response; proline transport; protein autoubiquitination; protein ubiquitination; respiratory burst involved in defense response; response to chitin; response to water deprivation

## Sheet: TS2_Leaf60Min
Table S2. Genes significantly differentially expressed in leaves 60 minutes post iron stress. Glyma2.0 ID refers to Glycine max version 2.0 release, data is sorted by Glyma 2.0 ID. For more information see http://www.phytozome.net/soybean.php. The top A. thaliana hit (TAIR version 10) was determined by BLASTP of Glyma2.0 primary proteins against A. thaliana proteins (TAIR10, E<10-6). Gene ontolog…
Glyma 2.0 ID	Log 2 Fold Change (Deficient/Sufficient)	False Discovery Rate	Top Arabidopsis (TAIR10) BLASTP Hit	E-value (E<10-6)	Gene Ontology Biological Process IDs	Gene Ontology Biological Process Descriptions
Glyma.01G041700	1.16419	0.00776648	AT3G01470.1|Symbols:ATHB-1, ATHB1, HD-ZIP-1, HAT5, HB-1|homeobox 1|chr3:182648-184034 REVERSE LENGTH=272	1e-43	GO:0006355 GO:0009637 GO:0009651 GO:0009965 GO:0010167 GO:0015706 GO:0015996 GO:0045893	chlorophyll catabolic process; leaf morphogenesis; nitrate transport; positive regulation of transcription, DNA-dependent; regulation of transcription, DNA-dependent; response to blue light; response to nitrate; response to salt stress
Glyma.01G099000	1.31659	0.00239149	AT3G51840.1|Symbols:ACX4, ATSCX, ATG6|acyl-CoA oxidase 4|chr3:19225653-19229008 REVERSE LENGTH=436	1e-32	GO:0006623 GO:0006635 GO:0007030 GO:0007033 GO:0008152 GO:0009793 GO:0016192 GO:0016558 GO:0044265 GO:0046459 GO:0055114	Golgi organization; cellular macromolecule catabolic process; embryo development ending in seed dormancy; fatty acid beta-oxidation; metabolic process; oxidation-reduction process; protein import into peroxisome matrix; protein targeting to vacuole; short-chain fatty acid metabolic process; vacuole organization; vesicle-mediated transport
Glyma.01G152900	-4.18521	9.37e-06	AT4G19380.1|Symbols:|Long-chain fatty alcohol dehydrogenase family protein|chr4:10568427-10572288 REVERSE LENGTH=726	0	GO:0055114	oxidation-reduction process
Glyma.01G183900	4.67008	2.53e-05	AT5G66870.1|Symbols:ASL1, LBD36|ASYMMETRIC LEAVES 2-like 1|chr5:26706621-26707562 FORWARD LENGTH=313	2e-73	GO:0006355 GO:0009954 GO:0009965 GO:0048441	leaf morphogenesis; petal development; proximal/distal pattern formation; regulation of transcription, DNA-dependent
Glyma.01G184600	-1.65997	6.27e-05	AT4G37080.3|Symbols:|Protein of unknown function, DUF547|chr4:17473719-17476716 FORWARD LENGTH=610	0	GO:0008150	biological process
Glyma.01G205600	2.01267	2.32e-05	AT4G17540.1|Symbols:|unknown protein; Has 30201 Blast hits to 17322 proteins in 780 species: Archae - 12; Bacteria - 1396; Metazoa - 17338; Fungi - 3422; Plants - 5037; Viruses - 0; Other Eukaryotes - 2996 (source: NCBI BLink).|chr4:9775982-9777765 FORWARD LENGTH=294	2e-72	GO:0008150	biological process
Glyma.01G209500	1.30827	0.00689514	AT5G47500.1|Symbols:|Pectin lyase-like superfamily protein|chr5:19271262-19272845 REVERSE LENGTH=362	0	GO:0016572 GO:0042545	cell wall modification; histone phosphorylation
Glyma.01G213800	1.93223	0.00138324	AT4G22860.1|Symbols:|Cell cycle regulated microtubule associated protein|chr4:11997735-12001281 FORWARD LENGTH=509	5e-133	GO:0000226 GO:0000911 GO:0006342 GO:0006346 GO:0008150 GO:0009909 GO:0016458 GO:0031048 GO:0034968 GO:0042127 GO:0051567	biological process; chromatin silencing; chromatin silencing by small RNA; cytokinesis by cell plate formation; gene silencing; histone H3-K9 methylation; histone lysine methylation; methylation-dependent chromatin silencing; microtubule cytoskeleton organization; regulation of cell proliferation; regulation of flower development
Glyma.02G010600	3.0242	1.59e-07	AT4G01950.1|Symbols:ATGPAT3, GPAT3|glycerol-3-phosphate acyltransferase 3|chr4:844597-846710 REVERSE LENGTH=520	0	GO:0006655 GO:0008152	metabolic process; phosphatidylglycerol biosynthetic process
Glyma.02G015500	1.95323	6.2e-08	AT2G47500.1|Symbols:|P-loop nucleoside triphosphate hydrolases superfamily protein with CH (Calponin Homology) domain|chr2:19493247-19497882 FORWARD LENGTH=983	0	GO:0007018	microtubule-based movement
Glyma.02G022300	1.2431	0.000686475	AT3G01470.1|Symbols:ATHB-1, ATHB1, HD-ZIP-1, HAT5, HB-1|homeobox 1|chr3:182648-184034 REVERSE LENGTH=272	8e-44	GO:0006355 GO:0009637 GO:0009651 GO:0009965 GO:0010167 GO:0015706 GO:0015996 GO:0045893	chlorophyll catabolic process; leaf morphogenesis; nitrate transport; positive regulation of transcription, DNA-dependent; regulation of transcription, DNA-dependent; response to blue light; response to nitrate; response to salt stress
Glyma.02G028000	2.02441	0.00305806	AT1G59970.1|Symbols:|Matrixin family protein|chr1:22073601-22074683 FORWARD LENGTH=360	3e-36	GO:0006508 GO:0008152	metabolic process; proteolysis
Glyma.02G046200	1.77475	0.00988259	AT3G51280.1|Symbols:|Tetratricopeptide repeat (TPR)-like superfamily protein|chr3:19037229-19038781 FORWARD LENGTH=430	0	GO:0006260 GO:0006270 GO:0006275 GO:0006306 GO:0008283 GO:0051567 GO:0051726	DNA methylation; DNA replication; DNA replication initiation; cell proliferation; histone H3-K9 methylation; regulation of DNA replication; regulation of cell cycle
Glyma.02G118300	1.33258	0.00287052	AT1G68760.1|Symbols:ATNUDT1, ATNUDX1, NUDX1|nudix hydrolase _x0001_1|chr1:25829090-25829607 FORWARD LENGTH=147	7e-29	GO:0006974	response to DNA damage stimulus
Glyma.02G119600	7.1298	0.00024249	AT1G13710.1|Symbols:CYP78A5, KLU|cytochrome P450, family 78, subfamily A, polypeptide 5|chr1:4702932-4704592 REVERSE LENGTH=517	0	GO:0008284 GO:0010075 GO:0010338 GO:0035265 GO:0040009 GO:0046622 GO:0048437 GO:0055114	floral organ development; leaf formation; organ growth; oxidation-reduction process; positive regulation of cell proliferation; positive regulation of organ growth; regulation of growth rate; regulation of meristem growth
Glyma.02G130900	1.69343	0.00103077	AT1G68760.1|Symbols:ATNUDT1, ATNUDX1, NUDX1|nudix hydrolase _x0001_1|chr1:25829090-25829607 FORWARD LENGTH=147	4e-32	GO:0006974	response to DNA damage stimulus
Glyma.02G214300	0.940323	0.00526307	AT5G60930.1|Symbols:|P-loop containing nucleoside triphosphate hydrolases superfamily protein|chr5:24515398-24522511 REVERSE LENGTH=1294	0	GO:0000911 GO:0007018 GO:0008283	cell proliferation; cytokinesis by cell plate formation; microtubule-based movement
Glyma.02G264900	2.53273	6.79e-07	AT4G37260.1|Symbols:MYB73, ATMYB73|myb domain protein 73|chr4:17540602-17541564 FORWARD LENGTH=320	1e-50	GO:0006355 GO:0009723 GO:0009737 GO:0009751 GO:0009753 GO:0010200 GO:0046686	regulation of transcription, DNA-dependent; response to abscisic acid stimulus; response to cadmium ion; response to chitin; response to ethylene stimulus; response to jasmonic acid stimulus; response to salicylic acid stimulus
Glyma.02G265900	3.59499	3.88e-05	AT2G44310.1|Symbols:|Calcium-binding EF-hand family protein|chr2:18309285-18309713 FORWARD LENGTH=142	3e-36	GO:0008150	biological process
Glyma.02G267900	-1.63684	0.00988259	AT1G05000.1|Symbols:|Phosphotyrosine protein phosphatases superfamily protein|chr1:1425660-1428393 FORWARD LENGTH=215	2e-100	GO:0007243 GO:0016311 GO:0043407	dephosphorylation; intracellular protein kinase cascade; negative regulation of MAP kinase activity
Glyma.02G273300	1.7896	8.83e-12	AT3G55360.1|Symbols:CER10, ECR, ATTSC13, TSC13|3-oxo-5-alpha-steroid 4-dehydrogenase family protein|chr3:20521186-20522856 REVERSE LENGTH=310	0	GO:0006629 GO:0006665 GO:0006816 GO:0007030 GO:0009651 GO:0010025 GO:0016126 GO:0046520	Golgi organization; calcium ion transport; lipid metabolic process; response to salt stress; sphingoid biosynthetic process; sphingolipid metabolic process; sterol biosynthetic process; wax biosynthetic process
Glyma.02G277600	1.7005	0.00936813	AT2G26760.1|Symbols:CYCB1;4|Cyclin B1;4|chr2:11401551-11403205 FORWARD LENGTH=387	2e-140	GO:0000079 GO:0010440 GO:0051726	regulation of cell cycle; regulation of cyclin-dependent protein serine/threonine kinase activity; stomatal lineage progression
Glyma.03G041300	2.21902	0.00423292	AT5G01740.1|Symbols:|Nuclear transport factor 2 (NTF2) family protein|chr5:280793-281281 FORWARD LENGTH=162	7e-49	GO:0008150	biological process
Glyma.03G061300	6.84776	0.00320257	NA	NA	NA	NA
Glyma.03G141700	-1.19958	0.00167308	AT2G42280.1|Symbols:|basic helix-loop-helix (bHLH) DNA-binding superfamily protein|chr2:17611428-17613163 REVERSE LENGTH=359	1e-76	GO:0006355 GO:0046685 GO:0048573	photoperiodism, flowering; regulation of transcription, DNA-dependent; response to arsenic-containing substance
Glyma.03G152300	1.75431	7.17e-05	AT2G27310.1|Symbols:|F-box family protein|chr2:11683954-11684967 REVERSE LENGTH=337	2e-38	GO:0002679 GO:0008150 GO:0009414 GO:0009693 GO:0009723 GO:0009737 GO:0009738 GO:0009873 GO:0010200 GO:0010286 GO:0035556 GO:0042538	abscisic acid mediated signaling pathway; biological process; ethylene biosynthetic process; ethylene mediated signaling pathway; heat acclimation; hyperosmotic salinity response; intracellular signal transduction; respiratory burst involved in defense response; response to abscisic acid stimulus; response to chitin; response to ethylene stimulus; response to water deprivation
Glyma.03G166000	1.34498	0.00375316	AT5G44040.1|Symbols:|unknown protein; BEST Arabidopsis thaliana protein match is: unknown protein (TAIR:AT1G04030.1); Has 1807 Blast hits to 1807 proteins in 277 species: Archae - 0; Bacteria - 0; Metazoa - 736; Fungi - 347; Plants - 385; Viruses - 0; Other Eukaryotes - 339 (source: NCBI BLink).|chr5:17719896-17721348 REVERSE LENGTH=416	1e-40	GO:0008150	biological process
Glyma.03G171900	3.32246	7.36e-05	AT2G37540.1|Symbols:|NAD(P)-binding Rossmann-fold superfamily protein|chr2:15751695-15753820 REVERSE LENGTH=321	7e-162	GO:0008152 GO:0009860	metabolic process; pollen tube growth
Glyma.03G203900	1.74793	0.000412895	AT5G06440.3|Symbols:|BEST Arabidopsis thaliana protein match is: Polyketide cyclase/dehydrase and lipid transport superfamily protein (TAIR:AT3G11720.3); Has 157 Blast hits to 155 proteins in 41 species: Archae - 0; Bacteria - 6; Metazoa - 5; Fungi - 6; Plants - 99; Viruses - 0; Other Eukaryotes - 41 (source: NCBI BLink).|chr5:1964641-1966807 REVERSE LENGTH=479	4e-111	GO:0008150	biological process
Glyma.03G217000	1.21057	0.000436667	AT2G47500.1|Symbols:|P-loop nucleoside triphosphate hydrolases superfamily protein with CH (Calponin Homology) domain|chr2:19493247-19497882 FORWARD LENGTH=983	0	GO:0007018	microtubule-based movement
Glyma.03G221400	1.81617	0.00155133	AT2G47240.2|Symbols:LACS1|AMP-dependent synthetase and ligase family protein|chr2:19393835-19397616 FORWARD LENGTH=660	0	GO:0001676 GO:0006631 GO:0006633 GO:0009627 GO:0010025 GO:0010103 GO:0010143 GO:0034976	cutin biosynthetic process; fatty acid biosynthetic process; fatty acid metabolic process; long-chain fatty acid metabolic process; response to endoplasmic reticulum stress; stomatal complex morphogenesis; systemic acquired resistance; wax biosynthetic process
Glyma.04G004100	1.33028	0.00255482	AT4G34990.1|Symbols:AtMYB32, MYB32|myb domain protein 32|chr4:16661370-16662289 REVERSE LENGTH=274	2e-91	GO:0006355 GO:0009651 GO:0009723 GO:0009737 GO:0009751 GO:0009753 GO:0009873 GO:0046686	ethylene mediated signaling pathway; regulation of transcription, DNA-dependent; response to abscisic acid stimulus; response to cadmium ion; response to ethylene stimulus; response to jasmonic acid stimulus; response to salicylic acid stimulus; response to salt stress
Glyma.04G036100	3.08764	0.00167308	AT1G27040.2|Symbols:|Major facilitator superfamily protein|chr1:9386893-9389838 REVERSE LENGTH=563	1e-155	GO:0006857	oligopeptide transport
Glyma.04G041400	1.07525	0.0022518	AT5G43020.1|Symbols:|Leucine-rich repeat protein kinase family protein|chr5:17255426-17257742 REVERSE LENGTH=669	0	GO:0000911 GO:0006468 GO:0007169	cytokinesis by cell plate formation; protein phosphorylation; transmembrane receptor protein tyrosine kinase signaling pathway
Glyma.04G087100	1.59211	0.00551511	AT4G32830.1|Symbols:AtAUR1, AUR1|ataurora1|chr4:15842557-15844354 FORWARD LENGTH=294	0	GO:0000278 GO:0006342 GO:0016572 GO:0051567	chromatin silencing; histone H3-K9 methylation; histone phosphorylation; mitotic cell cycle
Glyma.04G088700	-1.32793	0.00476081	AT5G49660.1|Symbols:|Leucine-rich repeat transmembrane protein kinase family protein|chr5:20161401-20164534 REVERSE LENGTH=966	0	GO:0002237 GO:0006468 GO:0006612 GO:0007165 GO:0009963 GO:0010051 GO:0010103 GO:0010363 GO:0048443	positive regulation of flavonoid biosynthetic process; protein phosphorylation; protein targeting to membrane; regulation of plant-type hypersensitive response; response to molecule of bacterial origin; signal transduction; stamen development; stomatal complex morphogenesis; xylem and phloem pattern formation
Glyma.04G151600	1.43303	0.00273579	AT1G08510.1|Symbols:FATB|fatty acyl-ACP thioesterases B|chr1:2691546-2693409 REVERSE LENGTH=412	0	GO:0006633 GO:0008152	fatty acid biosynthetic process; metabolic process
Glyma.04G181300	7.35337	0.00426034	AT1G23980.1|Symbols:|RING/U-box superfamily protein|chr1:8484879-8485988 REVERSE LENGTH=369	2e-16	NA	NA
Glyma.05G014900	2.02155	0.00399662	AT1G18550.1|Symbols:|ATP binding microtubule motor family protein|chr1:6381656-6384340 REVERSE LENGTH=725	0	GO:0007018	microtubule-based movement
Glyma.05G027000	1.98066	4.18e-07	AT3G47600.1|Symbols:MYB94, ATMYBCP70, ATMYB94|myb domain protein 94|chr3:17539627-17541035 REVERSE LENGTH=333	2e-111	GO:0006355 GO:0009651 GO:0009723 GO:0009733 GO:0009737 GO:0009751 GO:0009753 GO:0046686 GO:0080167	regulation of transcription, DNA-dependent; response to abscisic acid stimulus; response to auxin stimulus; response to cadmium ion; response to ethylene stimulus; response to jasmonic acid stimulus; response to karrikin; response to salicylic acid stimulus; response to salt stress
Glyma.05G055200	3.02028	0.00287052	AT5G62350.1|Symbols:|Plant invertase/pectin methylesterase inhibitor superfamily protein|chr5:25037504-25038112 FORWARD LENGTH=202	6e-50	GO:0006096 GO:0006833 GO:0006972 GO:0007030 GO:0009266 GO:0009651 GO:0046686	Golgi organization; glycolysis; hyperosmotic response; response to cadmium ion; response to salt stress; response to temperature stimulus; water transport
Glyma.05G075000	2.44157	0.00822049	AT5G24090.1|Symbols:ATCHIA, CHIA|chitinase A|chr5:8143805-8145153 REVERSE LENGTH=302	1e-102	GO:0005975 GO:0009409 GO:0009611 GO:0009642 GO:0009651 GO:0010228 GO:0016926 GO:0042631 GO:0050665	carbohydrate metabolic process; cellular response to water deprivation; hydrogen peroxide biosynthetic process; protein desumoylation; response to cold; response to light intensity; response to salt stress; response to wounding; vegetative to reproductive phase transition of meristem
Glyma.05G097600	3.73624	0.00126547	NA	NA	NA	NA
Glyma.05G134800	2.59747	0.00201712	AT4G20140.1|Symbols:GSO1|Leucine-rich repeat transmembrane protein kinase|chr4:10884220-10888045 FORWARD LENGTH=1249	0	GO:0006468 GO:0007169 GO:0008544 GO:0009790	embryo development; epidermis development; protein phosphorylation; transmembrane receptor protein tyrosine kinase signaling pathway
Glyma.05G196100	1.09109	0.000541823	AT5G63770.1|Symbols:ATDGK2, DGK2|diacylglycerol kinase 2|chr5:25519293-25522404 FORWARD LENGTH=712	0	GO:0007205 GO:0009409 GO:0009611 GO:0035556 GO:0048193 GO:0048364 GO:0048366 GO:0048527	Golgi vesicle transport; intracellular signal transduction; lateral root development; leaf development; protein kinase C-activating G-protein coupled receptor signaling pathway; response to cold; response to wounding; root development
Glyma.05G202700	-1.59662	0.00157471	AT5G50800.1|Symbols:SWEET13, AtSWEET13|Nodulin MtN3 family protein|chr5:20665280-20667140 REVERSE LENGTH=294	2e-95	GO:0015770	sucrose transport
Glyma.05G208500	-1.03745	0.00476081	AT2G45900.1|Symbols:|Phosphatidylinositol N-acetyglucosaminlytransferase subunit P-related|chr2:18886069-18888674 REVERSE LENGTH=720	5e-15	GO:0009739	response to gibberellin stimulus
Glyma.05G214300	1.14487	0.00141094	AT4G23740.1|Symbols:|Leucine-rich repeat protein kinase family protein|chr4:12367063-12369159 FORWARD LENGTH=638	0	GO:0006468 GO:0007169 GO:0010075	protein phosphorylation; regulation of meristem growth; transmembrane receptor protein tyrosine kinase signaling pathway
Glyma.05G216000	-1.86417	0.0023116	NA	NA	NA	NA
Glyma.06G003800	1.34502	5.01e-06	AT4G38620.1|Symbols:ATMYB4, MYB4|myb domain protein 4|chr4:18053866-18054876 FORWARD LENGTH=282	3e-101	GO:0006598 GO:0006857 GO:0009611 GO:0009698 GO:0009751 GO:0009753 GO:0009805 GO:0010224 GO:0042398 GO:0045892 GO:2000762	cellular modified amino acid biosynthetic process; coumarin biosynthetic process; negative regulation of transcription, DNA-dependent; oligopeptide transport; phenylpropanoid metabolic process; polyamine catabolic process; regulation of phenylpropanoid metabolic process; response to UV-B; response to jasmonic acid stimulus; response to salicylic acid stimulus; response to wounding
Glyma.06G087100	1.70271	7.81e-10	AT5G11650.1|Symbols:|alpha/beta-Hydrolases superfamily protein|chr5:3745069-3746816 FORWARD LENGTH=390	1e-171	GO:0010200	response to chitin
Glyma.06G087800	1.35811	1.26e-06	AT5G25880.1|Symbols:ATNADP-ME3, NADP-ME3|NADP-malic enzyme 3|chr5:9024549-9028260 FORWARD LENGTH=588	0	GO:0006094 GO:0006108 GO:0006499 GO:0007010 GO:0009827 GO:0009860 GO:0010498 GO:0051260 GO:0055114	N-terminal protein myristoylation; cytoskeleton organization; gluconeogenesis; malate metabolic process; oxidation-reduction process; plant-type cell wall modification; pollen tube growth; proteasomal protein catabolic process; protein homooligomerization
Glyma.06G088800	1.54626	0.00681521	AT4G32830.1|Symbols:AtAUR1, AUR1|ataurora1|chr4:15842557-15844354 FORWARD LENGTH=294	0	GO:0000278 GO:0006342 GO:0016572 GO:0051567	chromatin silencing; histone H3-K9 methylation; histone phosphorylation; mitotic cell cycle
Glyma.06G129400	-1.57751	0.00561841	AT5G24300.2|Symbols:SSI1|Glycogen/starch synthases, ADP-glucose type|chr5:8266934-8270860 FORWARD LENGTH=652	0	GO:0000023 GO:0001666 GO:0009058 GO:0009250 GO:0010021 GO:0019252 GO:0019375 GO:0043085	amylopectin biosynthetic process; biosynthetic process; galactolipid biosynthetic process; glucan biosynthetic process; maltose metabolic process; positive regulation of catalytic activity; response to hypoxia; starch biosynthetic process
Glyma.06G177500	-2.36776	0.000963463	NA	NA	NA	NA
Glyma.06G177600	-3.38169	0.00167308	NA	NA	NA	NA
Glyma.06G193600	2.59057	3.54e-05	AT3G47600.1|Symbols:MYB94, ATMYBCP70, ATMYB94|myb domain protein 94|chr3:17539627-17541035 REVERSE LENGTH=333	8e-115	GO:0006355 GO:0009651 GO:0009723 GO:0009733 GO:0009737 GO:0009751 GO:0009753 GO:0046686 GO:0080167	regulation of transcription, DNA-dependent; response to abscisic acid stimulus; response to auxin stimulus; response to cadmium ion; response to ethylene stimulus; response to jasmonic acid stimulus; response to karrikin; response to salicylic acid stimulus; response to salt stress
Glyma.06G285900	1.98013	0.00138324	AT3G58150.1|Symbols:|Optic atrophy 3 protein (OPA3)|chr3:21532947-21534072 REVERSE LENGTH=194	2e-41	GO:0008150	biological process
Glyma.06G290300	1.66201	0.00476081	AT1G03780.2|Symbols:TPX2|targeting protein for XKLP2|chr1:947785-951696 REVERSE LENGTH=758	0	GO:0000226 GO:0000280 GO:0000911 GO:0006270 GO:0006275 GO:0006306 GO:0006342 GO:0008283 GO:0009909 GO:0010389 GO:0016458 GO:0016572 GO:0031047 GO:0034968 GO:0042023 GO:0042127 GO:0045010 GO:0051225 GO:0051258 GO:0051567 GO:0051726	DNA endoreduplication; DNA methylation; DNA replication initiation; actin nucleation; cell proliferation; chromatin silencing; cytokinesis by cell plate formation; gene silencing; gene silencing by RNA; histone H3-K9 methylation; histone lysine methylation; histone phosphorylation; microtubule cytoskeleton organization; nuclear division; protein polymerization; regulation of DNA replication; regu…
Glyma.06G291700	-3.5334	1.57e-05	AT3G49190.1|Symbols:|O-acyltransferase (WSD1-like) family protein|chr3:18231988-18234376 REVERSE LENGTH=522	4e-52	NA	NA
Glyma.06G313500	-1.99743	0.00551511	AT5G13750.1|Symbols:ZIFL1|zinc induced facilitator-like 1|chr5:4438318-4441289 FORWARD LENGTH=478	0	GO:0009414 GO:0009630 GO:0010540 GO:0048364 GO:0080167 GO:0090333	basipetal auxin transport; gravitropism; regulation of stomatal closure; response to karrikin; response to water deprivation; root development
Glyma.07G088000	1.67784	0.000615577	NA	NA	NA	NA
Glyma.07G092100	3.90508	5.49e-08	AT5G16120.1|Symbols:|alpha/beta-Hydrolases superfamily protein|chr5:5266048-5267775 FORWARD LENGTH=351	7e-87	NA	NA
Glyma.07G108000	2.74853	6.51e-06	NA	NA	NA	NA
Glyma.07G151700	1.09404	0.00263096	AT3G51830.1|Symbols:ATG5, SAC8|SAC domain-containing protein 8|chr3:19220237-19225092 FORWARD LENGTH=588	0	GO:0032957 GO:0046855	inositol phosphate dephosphorylation; inositol trisphosphate metabolic process
Glyma.07G239700	1.40556	0.00142843	AT5G49460.1|Symbols:ACLB-2|ATP citrate lyase subunit B 2|chr5:20055048-20058195 FORWARD LENGTH=608	0	GO:0006084 GO:0006085 GO:0008152 GO:0010228 GO:0016126 GO:0016132 GO:0016926 GO:0044262 GO:0050665	acetyl-CoA biosynthetic process; acetyl-CoA metabolic process; brassinosteroid biosynthetic process; cellular carbohydrate metabolic process; hydrogen peroxide biosynthetic process; metabolic process; protein desumoylation; sterol biosynthetic process; vegetative to reproductive phase transition of meristem
Glyma.07G242600	3.8239	3.17e-08	AT5G49330.1|Symbols:MYB111, ATMYB111, PFG3|myb domain protein 111|chr5:19999147-20001293 REVERSE LENGTH=342	1e-72	GO:0006355 GO:0051555	flavonol biosynthetic process; regulation of transcription, DNA-dependent
Glyma.08G010000	-2.15238	4.76e-05	AT5G50800.1|Symbols:SWEET13, AtSWEET13|Nodulin MtN3 family protein|chr5:20665280-20667140 REVERSE LENGTH=294	1e-96	GO:0015770	sucrose transport
Glyma.08G070900	3.67235	5.65e-05	AT1G17840.1|Symbols:WBC11, ABCG11, DSO, COF1, ATWBC11|white-brown complex homolog protein 11|chr1:6142870-6145894 FORWARD LENGTH=703	0	GO:0009611 GO:0009651 GO:0009737 GO:0015908 GO:0080051	cutin transport; fatty acid transport; response to abscisic acid stimulus; response to salt stress; response to wounding
Glyma.08G145000	1.80413	0.00852214	NA	NA	NA	NA
Glyma.08G174300	1.90667	0.00499156	AT1G72250.2|Symbols:|Di-glucose binding protein with Kinesin motor domain|chr1:27192902-27198118 FORWARD LENGTH=1203	0	GO:0000226 GO:0000911 GO:0006306 GO:0006342 GO:0006346 GO:0007018 GO:0009909 GO:0016458 GO:0031047 GO:0031048 GO:0034968 GO:0048451 GO:0048453 GO:0051567	DNA methylation; chromatin silencing; chromatin silencing by small RNA; cytokinesis by cell plate formation; gene silencing; gene silencing by RNA; histone H3-K9 methylation; histone lysine methylation; methylation-dependent chromatin silencing; microtubule-based movement; microtubule cytoskeleton organization; petal formation; regulation of flower development; sepal formation
Glyma.08G188600	3.1507	0.000243491	AT1G11000.1|Symbols:MLO4, ATMLO4|Seven transmembrane MLO family protein|chr1:3671935-3675909 REVERSE LENGTH=573	0	GO:0006952 GO:0008219	cell death; defense response
Glyma.08G203100	-2.12162	0.000927646	AT4G29080.1|Symbols:PAP2, IAA27|phytochrome-associated protein 2|chr4:14323665-14325213 REVERSE LENGTH=305	2e-99	GO:0006355 GO:0006417 GO:0007389 GO:0009733 GO:0048438 GO:0048439	floral whorl development; flower morphogenesis; pattern specification process; regulation of transcription, DNA-dependent; regulation of translation; response to auxin stimulus
Glyma.08G212300	2.34908	0.00346813	AT5G20190.1|Symbols:|Tetratricopeptide repeat (TPR)-like superfamily protein|chr5:6814093-6815171 FORWARD LENGTH=290	3e-37	GO:0008150	biological process
Glyma.08G230500	9.10559	3.21e-09	AT1G70890.1|Symbols:MLP43|MLP-like protein 43|chr1:26725912-26726489 REVERSE LENGTH=158	3e-31	GO:0006952 GO:0030003 GO:0070838	cellular cation homeostasis; defense response; divalent metal ion transport
Glyma.08G250800	4.09867	0.000834064	AT5G60910.1|Symbols:AGL8, FUL|AGAMOUS-like 8|chr5:24502736-24506013 REVERSE LENGTH=242	3e-79	GO:0006355 GO:0009911 GO:0010077 GO:0010154 GO:0031540 GO:0048481	fruit development; maintenance of inflorescence meristem identity; ovule development; positive regulation of flower development; regulation of anthocyanin biosynthetic process; regulation of transcription, DNA-dependent
Glyma.08G279700	1.87744	9.52e-05	AT5G10480.1|Symbols:PAS2, PEP|Protein-tyrosine phosphatase-like, PTPLA|chr5:3298047-3300048 REVERSE LENGTH=221	2e-121	GO:0000271 GO:0009825 GO:0009932 GO:0010817 GO:0019344 GO:0030154 GO:0042761 GO:0043481 GO:0048640 GO:0048767 GO:0050732 GO:0051302 GO:0071555	anthocyanin accumulation in tissues in response to UV light; cell differentiation; cell tip growth; cell wall organization; cysteine biosynthetic process; multidimensional cell growth; negative regulation of developmental growth; negative regulation of peptidyl-tyrosine phosphorylation; polysaccharide biosynthetic process; regulation of cell division; regulation of hormone levels; root hair elong…
Glyma.08G295600	-1.62296	0.00346813	AT5G39950.1|Symbols:ATTRX2, ATH2, ATTRXH2, TRXH2, TRX2|thioredoxin 2|chr5:15990885-15991881 REVERSE LENGTH=133	5e-42	GO:0000103 GO:0000280 GO:0006499 GO:0006662 GO:0007000 GO:0045454	N-terminal protein myristoylation; cell redox homeostasis; glycerol ether metabolic process; nuclear division; nucleolus organization; sulfate assimilation
Glyma.08G296000	2.00322	5.49e-08	AT1G69850.1|Symbols:ATNRT1:2, NTL1, NRT1:2|nitrate transporter 1:2|chr1:26296945-26300407 REVERSE LENGTH=585	0	GO:0009624 GO:0010119 GO:0080168	abscisic acid transport; regulation of stomatal movement; response to nematode
Glyma.08G296100	2.58003	5.84e-05	AT1G69850.1|Symbols:ATNRT1:2, NTL1, NRT1:2|nitrate transporter 1:2|chr1:26296945-26300407 REVERSE LENGTH=585	0	GO:0009624 GO:0010119 GO:0080168	abscisic acid transport; regulation of stomatal movement; response to nematode
Glyma.08G326000	-1.63346	0.00040934	AT2G05160.1|Symbols:|CCCH-type zinc fingerfamily protein with RNA-binding domain|chr2:1859011-1860931 REVERSE LENGTH=536	9e-123	GO:0008150	biological process
Glyma.08G340200	1.3166	0.00533368	AT3G60190.1|Symbols:ADL4, ADLP2, EDR3, DRP1E, ADL1E, DL1E|DYNAMIN-like 1E|chr3:22244367-22247651 REVERSE LENGTH=624	0	GO:0000165 GO:0006612 GO:0009595 GO:0009697 GO:0009862 GO:0009867 GO:0010200 GO:0010310 GO:0010363 GO:0016192 GO:0031348 GO:0042742 GO:0043900 GO:0046686 GO:0050832	MAPK cascade; defense response to bacterium; defense response to fungus; detection of biotic stimulus; jasmonic acid mediated signaling pathway; negative regulation of defense response; protein targeting to membrane; regulation of hydrogen peroxide metabolic process; regulation of multi-organism process; regulation of plant-type hypersensitive response; response to cadmium ion; response to chitin…
Glyma.09G012200	3.10866	6.79e-07	AT2G35760.1|Symbols:|Uncharacterised protein family (UPF0497)|chr2:15032059-15033094 FORWARD LENGTH=201	3e-87	GO:0008150 GO:0009741 GO:0015996	biological process; chlorophyll catabolic process; response to brassinosteroid stimulus
Glyma.09G021700	-3.72382	0.00895968	AT2G20340.1|Symbols:|Pyridoxal phosphate (PLP)-dependent transferases superfamily protein|chr2:8779804-8782490 FORWARD LENGTH=490	0	GO:0006520 GO:0006559 GO:0009611	L-phenylalanine catabolic process; cellular amino acid metabolic process; response to wounding
Glyma.09G022400	2.11757	0.00986725	AT2G38380.1|Symbols:|Peroxidase superfamily protein|chr2:16076443-16078314 FORWARD LENGTH=349	1e-133	GO:0006979 GO:0009651 GO:0010043 GO:0055114	oxidation-reduction process; response to oxidative stress; response to salt stress; response to zinc ion
Glyma.09G023000	7.82271	1.59e-07	AT2G38380.1|Symbols:|Peroxidase superfamily protein|chr2:16076443-16078314 FORWARD LENGTH=349	1e-125	GO:0006979 GO:0009651 GO:0010043 GO:0055114	oxidation-reduction process; response to oxidative stress; response to salt stress; response to zinc ion
Glyma.09G040800	1.59101	0.00155133	AT1G24020.2|Symbols:MLP423|MLP-like protein 423|chr1:8500653-8501458 REVERSE LENGTH=155	7e-09	GO:0006952 GO:0016556	defense response; mRNA modification
Glyma.09G092700	2.68185	0.000917103	AT3G22142.1|Symbols:|Bifunctional inhibitor/lipid-transfer protein/seed storage 2S albumin superfamily protein|chr3:7803604-7808046 REVERSE LENGTH=1480	8e-50	GO:0006869	lipid transport
Glyma.09G134000	4.33647	0.00040934	AT4G00350.1|Symbols:|MATE efflux family protein|chr4:151978-153988 FORWARD LENGTH=542	7e-82	GO:0006855 GO:0009860 GO:0030048 GO:0055085	actin filament-based movement; drug transmembrane transport; pollen tube growth; transmembrane transport
Glyma.09G181200	1.48898	0.00143779	AT1G18370.1|Symbols:HIK, ATNACK1, NACK1|ATP binding microtubule motor family protein|chr1:6319732-6323820 REVERSE LENGTH=974	0	GO:0000226 GO:0000910 GO:0000911 GO:0007018 GO:0008283 GO:0009555 GO:0009558 GO:0010583 GO:0016572 GO:0048229	cell proliferation; cytokinesis; cytokinesis by cell plate formation; embryo sac cellularization; gametophyte development; histone phosphorylation; microtubule-based movement; microtubule cytoskeleton organization; pollen development; response to cyclopentenone
Glyma.09G184000	3.29065	6.17e-07	AT5G16120.1|Symbols:|alpha/beta-Hydrolases superfamily protein|chr5:5266048-5267775 FORWARD LENGTH=351	3e-164	NA	NA
Glyma.09G218100	-3.58414	0.00160646	AT4G19380.1|Symbols:|Long-chain fatty alcohol dehydrogenase family protein|chr4:10568427-10572288 REVERSE LENGTH=726	0	GO:0055114	oxidation-reduction process
Glyma.09G230500	-0.969056	0.00240217	AT4G25290.1|Symbols:|DNA photolyases;DNA photolyases|chr4:12941486-12944994 REVERSE LENGTH=692	0	GO:0006281	DNA repair
Glyma.09G231500	-1.44538	0.00908521	AT1G62660.1|Symbols:|Glycosyl hydrolases family 32 protein|chr1:23199949-23203515 FORWARD LENGTH=648	0	GO:0005975 GO:0006598 GO:0006816 GO:0006826 GO:0007030 GO:0009611 GO:0009617 GO:0009651 GO:0009698 GO:0009805 GO:0010106 GO:0010167 GO:0015706 GO:0016132 GO:0042398 GO:0071370	Golgi organization; brassinosteroid biosynthetic process; calcium ion transport; carbohydrate metabolic process; cellular modified amino acid biosynthetic process; cellular response to gibberellin stimulus; cellular response to iron ion starvation; coumarin biosynthetic process; iron ion transport; nitrate transport; phenylpropanoid metabolic process; polyamine catabolic process; response to bact…
Glyma.09G278100	-1.85274	0.000100588	AT2G40435.1|Symbols:|BEST Arabidopsis thaliana protein match is: transcription regulators (TAIR:AT3G56220.1); Has 289 Blast hits to 289 proteins in 30 species: Archae - 0; Bacteria - 0; Metazoa - 0; Fungi - 0; Plants - 289; Viruses - 0; Other Eukaryotes - 0 (source: NCBI BLink).|chr2:16887048-16888407 FORWARD LENGTH=158	2e-51	NA	NA
Glyma.10G001800	1.13185	0.00304666	AT2G26640.1|Symbols:KCS11|3-ketoacyl-CoA synthase 11|chr2:11330094-11331623 FORWARD LENGTH=509	0	GO:0006084 GO:0006633 GO:0006816 GO:0007030 GO:0008152 GO:0008610 GO:0009409 GO:0009416 GO:0009651 GO:0009832 GO:0016049 GO:0016126 GO:0016132 GO:0030243	Golgi organization; acetyl-CoA metabolic process; brassinosteroid biosynthetic process; calcium ion transport; cell growth; cellulose metabolic process; fatty acid biosynthetic process; lipid biosynthetic process; metabolic process; plant-type cell wall biogenesis; response to cold; response to light stimulus; response to salt stress; sterol biosynthetic process
Glyma.10G011000	3.36107	1.97e-13	AT4G01950.1|Symbols:ATGPAT3, GPAT3|glycerol-3-phosphate acyltransferase 3|chr4:844597-846710 REVERSE LENGTH=520	0	GO:0006655 GO:0008152	metabolic process; phosphatidylglycerol biosynthetic process
Glyma.10G016000	1.21309	0.00138324	AT2G47500.1|Symbols:|P-loop nucleoside triphosphate hydrolases superfamily protein with CH (Calponin Homology) domain|chr2:19493247-19497882 FORWARD LENGTH=983	0	GO:0007018	microtubule-based movement
Glyma.10G017000	1.61762	0.00287052	AT4G02290.1|Symbols:AtGH9B13, GH9B13|glycosyl hydrolase 9B13|chr4:1002654-1005125 REVERSE LENGTH=516	0	GO:0005975 GO:0010089 GO:0044036	carbohydrate metabolic process; cell wall macromolecule metabolic process; xylem development
Glyma.10G043700	1.47689	2.34e-05	AT2G37540.1|Symbols:|NAD(P)-binding Rossmann-fold superfamily protein|chr2:15751695-15753820 REVERSE LENGTH=321	5e-161	GO:0008152 GO:0009860	metabolic process; pollen tube growth
Glyma.10G132500	2.58085	1.02e-05	AT3G18280.1|Symbols:|Bifunctional inhibitor/lipid-transfer protein/seed storage 2S albumin superfamily protein|chr3:6267102-6267392 FORWARD LENGTH=96	1e-34	GO:0006612 GO:0006869 GO:0009963 GO:0010363	lipid transport; positive regulation of flavonoid biosynthetic process; protein targeting to membrane; regulation of plant-type hypersensitive response
Glyma.10G158900	-1.37105	0.00898511	NA	NA	NA	NA
Glyma.10G217000	1.59045	0.00700002	AT4G09570.1|Symbols:CPK4, ATCPK4|calcium-dependent protein kinase 4|chr4:6049560-6052184 FORWARD LENGTH=501	0	GO:0006468 GO:0009627 GO:0009697 GO:0009789 GO:0009863 GO:0030968 GO:0031348 GO:0045087	endoplasmic reticulum unfolded protein response; innate immune response; negative regulation of defense response; positive regulation of abscisic acid mediated signaling pathway; protein phosphorylation; salicylic acid biosynthetic process; salicylic acid mediated signaling pathway; systemic acquired resistance
Glyma.10G226200	4.31981	0.000121853	AT1G43710.1|Symbols:emb1075|Pyridoxal phosphate (PLP)-dependent transferases superfamily protein|chr1:16486534-16488298 REVERSE LENGTH=482	0	GO:0006520 GO:0006580 GO:0009793	cellular amino acid metabolic process; embryo development ending in seed dormancy; ethanolamine metabolic process
Glyma.10G252400	-1.12236	0.00120969	AT4G21215.2|Symbols:|unknown protein; Has 35333 Blast hits to 34131 proteins in 2444 species: Archae - 798; Bacteria - 22429; Metazoa - 974; Fungi - 991; Plants - 531; Viruses - 0; Other Eukaryotes - 9610 (source: NCBI BLink).|chr4:11310890-11313421 REVERSE LENGTH=199	2e-30	NA	NA
Glyma.11G032700	3.15849	0.000361169	AT5G47500.1|Symbols:|Pectin lyase-like superfamily protein|chr5:19271262-19272845 REVERSE LENGTH=362	0	GO:0016572 GO:0042545	cell wall modification; histone phosphorylation
Glyma.11G057600	-2.07256	3.71e-05	AT4G37080.1|Symbols:|Protein of unknown function, DUF547|chr4:17474205-17476716 FORWARD LENGTH=597	3e-165	GO:0008150	biological process
Glyma.11G082900	2.30266	0.00108529	AT4G35690.1|Symbols:|Arabidopsis protein of unknown function (DUF241)|chr4:16921886-16922740 FORWARD LENGTH=284	2e-45	GO:0008150	biological process
Glyma.11G133300	3.40786	5.96e-13	AT4G36250.1|Symbols:ALDH3F1|aldehyde dehydrogenase 3F1|chr4:17151029-17153381 FORWARD LENGTH=484	0	GO:0006081 GO:0008152 GO:0009612 GO:0019722 GO:0042631 GO:0055114	calcium-mediated signaling; cellular aldehyde metabolic process; cellular response to water deprivation; metabolic process; oxidation-reduction process; response to mechanical stimulus
Glyma.11G164000	2.03948	0.00171426	AT2G30210.1|Symbols:LAC3|laccase 3|chr2:12887735-12889827 REVERSE LENGTH=570	0	GO:0046274 GO:0055114	lignin catabolic process; oxidation-reduction process
Glyma.11G175000	7.1056	2.59e-05	AT3G16270.1|Symbols:|ENTH/VHS family protein|chr3:5513701-5516540 FORWARD LENGTH=690	1e-68	GO:0000902 GO:0006623 GO:0006886 GO:0016049 GO:0016192 GO:0048193	Golgi vesicle transport; cell growth; cell morphogenesis; intracellular protein transport; protein targeting to vacuole; vesicle-mediated transport
Glyma.11G185100	3.03769	0.00501093	AT4G33790.1|Symbols:CER4, G7, FAR3|Jojoba acyl CoA reductase-related male sterility protein|chr4:16204325-16207891 REVERSE LENGTH=493	0	GO:0009556 GO:0010025 GO:0055114	microsporogenesis; oxidation-reduction process; wax biosynthetic process
Glyma.11G208600	1.90914	8.36e-08	AT1G17200.1|Symbols:|Uncharacterised protein family (UPF0497)|chr1:5878493-5879871 FORWARD LENGTH=204	4e-79	GO:0006949 GO:0080167	response to karrikin; syncytium formation
Glyma.11G222300	3.32376	0.00344872	AT5G06060.1|Symbols:|NAD(P)-binding Rossmann-fold superfamily protein|chr5:1824066-1825833 REVERSE LENGTH=264	2e-128	GO:0008152	metabolic process
Glyma.12G132800	3.28105	1.1e-06	AT3G23410.1|Symbols:ATFAO3, FAO3|fatty alcohol oxidase 3|chr3:8382860-8386024 FORWARD LENGTH=746	0	GO:0006066 GO:0055114	alcohol metabolic process; oxidation-reduction process
Glyma.12G154300	-1.16327	0.00155133	AT3G15353.1|Symbols:MT3, ATMT3|metallothionein 3|chr3:5180825-5181325 REVERSE LENGTH=69	5e-15	GO:0006612 GO:0006833 GO:0006878 GO:0006970 GO:0007389 GO:0008361 GO:0009651 GO:0009750 GO:0009926 GO:0009963 GO:0010015 GO:0010363 GO:0040007 GO:0046686	auxin polar transport; cellular copper ion homeostasis; growth; pattern specification process; positive regulation of flavonoid biosynthetic process; protein targeting to membrane; regulation of cell size; regulation of plant-type hypersensitive response; response to cadmium ion; response to fructose stimulus; response to osmotic stress; response to salt stress; root morphogenesis; water transport
Glyma.13G001900	1.21442	0.00514657	AT4G24100.1|Symbols:|Protein kinase superfamily protein|chr4:12515223-12519336 FORWARD LENGTH=709	0	GO:0006468	protein phosphorylation
Glyma.13G043000	3.96023	1.35e-06	AT1G17840.1|Symbols:WBC11, ABCG11, DSO, COF1, ATWBC11|white-brown complex homolog protein 11|chr1:6142870-6145894 FORWARD LENGTH=703	0	GO:0009611 GO:0009651 GO:0009737 GO:0015908 GO:0080051	cutin transport; fatty acid transport; response to abscisic acid stimulus; response to salt stress; response to wounding
Glyma.13G095400	2.80274	0.000333444	AT4G25830.1|Symbols:|Uncharacterised protein family (UPF0497)|chr4:13133727-13134790 FORWARD LENGTH=175	1e-37	GO:0008150 GO:0045333	biological process; cellular respiration
Glyma.13G173500	-1.47943	0.000947398	AT5G06900.1|Symbols:CYP93D1|cytochrome P450, family 93, subfamily D, polypeptide 1|chr5:2136160-2137925 REVERSE LENGTH=507	9e-104	GO:0055114	oxidation-reduction process
Glyma.13G183200	-2.71123	0.000904557	NA	NA	NA	NA
Glyma.13G236100	1.71515	5e-05	AT2G33850.1|Symbols:|unknown protein; FUNCTIONS IN: molecular_function unknown; INVOLVED IN: biological_process unknown; LOCATED IN: endomembrane system; EXPRESSED IN: 17 plant structures; EXPRESSED DURING: 9 growth stages; BEST Arabidopsis thaliana protein match is: unknown protein (TAIR:AT1G28400.1); Has 3053 Blast hits to 2119 proteins in 133 species: Archae - 6; Bacteria - 52; Metazoa - 135; …	5e-12	GO:0008150	biological process
Glyma.13G240100	1.04272	0.00505359	AT3G05500.1|Symbols:|Rubber elongation factor protein (REF)|chr3:1593540-1594802 FORWARD LENGTH=246	3e-76	GO:0006865 GO:0008150 GO:0010200	amino acid transport; biological process; response to chitin
Glyma.13G276600	1.15917	0.00283524	AT3G15350.2|Symbols:|Core-2/I-branching beta-1,6-N-acetylglucosaminyltransferase family protein|chr3:5167250-5168882 FORWARD LENGTH=424	0	GO:0016051	carbohydrate biosynthetic process
Glyma.13G300400	1.5443	0.00485182	AT1G52855.1|Symbols:|unknown protein; BEST Arabidopsis thaliana protein match is: unknown protein (TAIR:AT3G15534.1); Has 35333 Blast hits to 34131 proteins in 2444 species: Archae - 798; Bacteria - 22429; Metazoa - 974; Fungi - 991; Plants - 531; Viruses - 0; Other Eukaryotes - 9610 (source: NCBI BLink).|chr1:19683137-19683343 REVERSE LENGTH=68	7e-33	GO:0008150	biological process
Glyma.13G304200	2.87464	8.03e-05	AT3G09280.1|Symbols:|unknown protein; FUNCTIONS IN: molecular_function unknown; INVOLVED IN: biological_process unknown; LOCATED IN: endomembrane system; EXPRESSED IN: root; Has 31 Blast hits to 31 proteins in 9 species: Archae - 0; Bacteria - 0; Metazoa - 0; Fungi - 0; Plants - 31; Viruses - 0; Other Eukaryotes - 0 (source: NCBI BLink).|chr3:2850920-2851258 REVERSE LENGTH=112	8e-13	GO:0008150	biological process
Glyma.13G361300	1.7975	3.16e-06	NA	NA	NA	NA
Glyma.14G029100	-1.6895	0.000262132	AT1G04920.1|Symbols:ATSPS3F, SPS3F|sucrose phosphate synthase 3F|chr1:1391674-1395756 REVERSE LENGTH=1062	0	GO:0001666 GO:0005985 GO:0009058 GO:0019375	biosynthetic process; galactolipid biosynthetic process; response to hypoxia; sucrose metabolic process
Glyma.14G043500	1.07354	0.00287052	AT3G55360.1|Symbols:CER10, ECR, ATTSC13, TSC13|3-oxo-5-alpha-steroid 4-dehydrogenase family protein|chr3:20521186-20522856 REVERSE LENGTH=310	0	GO:0006629 GO:0006665 GO:0006816 GO:0007030 GO:0009651 GO:0010025 GO:0016126 GO:0046520	Golgi organization; calcium ion transport; lipid metabolic process; response to salt stress; sphingoid biosynthetic process; sphingolipid metabolic process; sterol biosynthetic process; wax biosynthetic process
Glyma.14G053500	1.74004	0.00447625	AT5G01790.1|Symbols:|unknown protein; FUNCTIONS IN: molecular_function unknown; INVOLVED IN: biological_process unknown; LOCATED IN: chloroplast; EXPRESSED IN: 19 plant structures; EXPRESSED DURING: 13 growth stages; Has 121 Blast hits to 121 proteins in 12 species: Archae - 0; Bacteria - 0; Metazoa - 0; Fungi - 0; Plants - 121; Viruses - 0; Other Eukaryotes - 0 (source: NCBI BLink).|chr5:305057-…	4e-08	GO:0008150 GO:0042546	biological process; cell wall biogenesis
Glyma.14G071100	1.36707	0.00158622	AT1G35180.1|Symbols:|TRAM, LAG1 and CLN8 (TLC) lipid-sensing domain containing protein|chr1:12877230-12878644 REVERSE LENGTH=231	2e-106	GO:0008150	biological process
Glyma.14G214900	3.7759	3.47e-05	NA	NA	NA	NA
Glyma.15G012600	1.66968	0.000146687	NA	NA	NA	NA
Glyma.15G042500	2.02415	0.00344249	AT2G28630.1|Symbols:KCS12|3-ketoacyl-CoA synthase 12|chr2:12275719-12277149 REVERSE LENGTH=476	0	GO:0006633 GO:0008152 GO:0008610	fatty acid biosynthetic process; lipid biosynthetic process; metabolic process
Glyma.15G042600	3.05922	0.00811591	AT1G07710.1|Symbols:|Ankyrin repeat family protein|chr1:2386275-2387986 REVERSE LENGTH=543	0	GO:0008150	biological process
Glyma.15G068900	1.23093	0.00521487	AT4G21620.1|Symbols:|glycine-rich protein|chr4:11491519-11491914 FORWARD LENGTH=131	1e-19	GO:0008150	biological process
Glyma.15G098500	0.916942	0.00686253	AT4G25050.1|Symbols:ACP4|acyl carrier protein 4|chr4:12870178-12871024 FORWARD LENGTH=137	7e-36	GO:0006364 GO:0006633 GO:0009416 GO:0009627 GO:0009637 GO:0009644 GO:0009657 GO:0009744 GO:0010114 GO:0010155 GO:0010207 GO:0010218 GO:0019288 GO:0042335	cuticle development; fatty acid biosynthetic process; isopentenyl diphosphate biosynthetic process, mevalonate-independent pathway; photosystem II assembly; plastid organization; rRNA processing; regulation of proton transport; response to blue light; response to far red light; response to high light intensity; response to light stimulus; response to red light; response to sucrose stimulus; syste…
Glyma.15G118800	2.15748	0.00904367	AT4G14540.1|Symbols:NF-YB3|nuclear factor Y, subunit B3|chr4:8344663-8345148 FORWARD LENGTH=161	7e-72	GO:0006355	regulation of transcription, DNA-dependent
Glyma.15G144000	3.5177	1.86e-05	AT5G49330.1|Symbols:MYB111, ATMYB111, PFG3|myb domain protein 111|chr5:19999147-20001293 REVERSE LENGTH=342	1e-72	GO:0006355 GO:0051555	flavonol biosynthetic process; regulation of transcription, DNA-dependent
Glyma.15G146400	1.46185	0.00114866	AT1G24020.2|Symbols:MLP423|MLP-like protein 423|chr1:8500653-8501458 REVERSE LENGTH=155	6e-08	GO:0006952 GO:0016556	defense response; mRNA modification
Glyma.15G161100	-0.960302	0.00648227	AT1G21065.1|Symbols:|unknown protein; INVOLVED IN: biological_process unknown; LOCATED IN: chloroplast; EXPRESSED IN: 22 plant structures; EXPRESSED DURING: 13 growth stages; CONTAINS InterPro DOMAIN/s: Uncharacterised protein family UPF0047 (InterPro:IPR001602); Has 3800 Blast hits to 3784 proteins in 1137 species: Archae - 215; Bacteria - 2154; Metazoa - 42; Fungi - 99; Plants - 99; Viruses - 0…	5e-91	GO:0008150	biological process
Glyma.15G186100	3.57185	0.00988259	AT5G28050.1|Symbols:|Cytidine/deoxycytidylate deaminase family protein|chr5:10044209-10045755 REVERSE LENGTH=185	2e-105	GO:0009061 GO:0009218 GO:0019690 GO:0019692	anaerobic respiration; deoxyribose phosphate metabolic process; pyrimidine deoxyribonucleoside interconversion; pyrimidine ribonucleotide metabolic process
Glyma.15G240300	-7.6498	0.00149411	NA	NA	NA	NA
Glyma.16G010500	2.13445	1.57e-05	AT5G66840.1|Symbols:|SAP domain-containing protein|chr5:26692922-26695296 REVERSE LENGTH=551	2e-61	NA	NA
Glyma.16G020500	2.36701	0.00101655	AT4G00870.1|Symbols:|basic helix-loop-helix (bHLH) DNA-binding superfamily protein|chr4:362230-363639 REVERSE LENGTH=423	1e-77	GO:0006355	regulation of transcription, DNA-dependent
Glyma.16G040200	1.48383	0.00138324	AT3G03860.1|Symbols:ATAPRL5, APRL5|APR-like 5|chr3:992465-994315 FORWARD LENGTH=300	5e-87	GO:0045454	cell redox homeostasis
Glyma.16G069500	7.42402	0.000432532	AT5G01750.2|Symbols:|Protein of unknown function (DUF567)|chr5:290034-291109 FORWARD LENGTH=217	3e-39	GO:0006569 GO:0006995 GO:0008150 GO:0009684 GO:0030003 GO:0070838	biological process; cellular cation homeostasis; cellular response to nitrogen starvation; divalent metal ion transport; indoleacetic acid biosynthetic process; tryptophan catabolic process
Glyma.16G069700	7.51734	0.000146687	AT5G01750.2|Symbols:|Protein of unknown function (DUF567)|chr5:290034-291109 FORWARD LENGTH=217	2e-39	GO:0006569 GO:0006995 GO:0008150 GO:0009684 GO:0030003 GO:0070838	biological process; cellular cation homeostasis; cellular response to nitrogen starvation; divalent metal ion transport; indoleacetic acid biosynthetic process; tryptophan catabolic process
Glyma.16G070100	7.51734	0.000146687	AT3G11740.1|Symbols:|Protein of unknown function (DUF567)|chr3:3712427-3713389 FORWARD LENGTH=194	6e-16	GO:0008150	biological process
Glyma.16G089000	-2.21608	0.000963463	AT5G62790.1|Symbols:DXR, PDE129|1-deoxy-D-xylulose 5-phosphate reductoisomerase|chr5:25214358-25217292 REVERSE LENGTH=477	0	GO:0000023 GO:0000096 GO:0006098 GO:0006546 GO:0006636 GO:0006655 GO:0006733 GO:0006766 GO:0008299 GO:0008652 GO:0009072 GO:0009106 GO:0009108 GO:0009117 GO:0009416 GO:0009695 GO:0015994 GO:0015995 GO:0016117 GO:0019216 GO:0019252 GO:0019288 GO:0019748 GO:0019760 GO:0019761 GO:0031408 GO:0042744 GO:0043085 GO:0044272 GO:0046686 GO:0055114	aromatic amino acid family metabolic process; carotenoid biosynthetic process; cellular amino acid biosynthetic process; chlorophyll biosynthetic process; chlorophyll metabolic process; coenzyme biosynthetic process; glucosinolate biosynthetic process; glucosinolate metabolic process; glycine catabolic process; hydrogen peroxide catabolic process; isopentenyl diphosphate biosynthetic process, mev…
Glyma.16G095000	-1.77382	0.00299241	AT2G26570.1|Symbols:WEB1|Plant protein of unknown function (DUF827)|chr2:11299565-11302076 FORWARD LENGTH=807	4e-170	GO:0009903 GO:0009904	chloroplast accumulation movement; chloroplast avoidance movement
Glyma.16G110100	3.1269	0.00121669	AT1G31770.1|Symbols:ABCG14|ATP-binding cassette 14|chr1:11375252-11377644 REVERSE LENGTH=648	0	NA	NA
Glyma.16G135200	1.87115	0.00988259	AT5G17680.1|Symbols:|disease resistance protein (TIR-NBS-LRR class), putative|chr5:5822999-5827153 FORWARD LENGTH=1294	2e-136	GO:0006952 GO:0007165	defense response; signal transduction
Glyma.16G178800	1.43769	0.00757879	AT5G52640.1|Symbols:HSP81-1, ATHS83, HSP81.1, HSP83, ATHSP90.1, AtHsp90-1, HSP90.1|heat shock protein 90.1|chr5:21352542-21355147 FORWARD LENGTH=705	0	GO:0006457 GO:0009408 GO:0009644 GO:0009816 GO:0042542 GO:0042742 GO:0046685	defense response to bacterium; defense response to bacterium, incompatible interaction; protein folding; response to arsenic-containing substance; response to heat; response to high light intensity; response to hydrogen peroxide
Glyma.16G188900	-2.66335	0.00717348	AT5G23850.1|Symbols:|Arabidopsis thaliana protein of unknown function (DUF821)|chr5:8038126-8040741 FORWARD LENGTH=542	0	GO:0008150	biological process
Glyma.16G220900	3.02849	0.00240268	AT2G38600.1|Symbols:|HAD superfamily, subfamily IIIB acid phosphatase|chr2:16145907-16146857 FORWARD LENGTH=251	1e-94	NA	NA
Glyma.17G015400	1.37648	0.00291304	AT1G11600.1|Symbols:CYP77B1|cytochrome P450, family 77, subfamily B, polypeptide 1|chr1:3902090-3903622 FORWARD LENGTH=510	0	GO:0055114	oxidation-reduction process
Glyma.17G031600	3.80733	1.35e-08	AT5G49330.1|Symbols:MYB111, ATMYB111, PFG3|myb domain protein 111|chr5:19999147-20001293 REVERSE LENGTH=342	3e-74	GO:0006355 GO:0051555	flavonol biosynthetic process; regulation of transcription, DNA-dependent
Glyma.17G041900	2.0934	0.000917103	AT1G09520.1|Symbols:|LOCATED IN: chloroplast; EXPRESSED IN: 21 plant structures; EXPRESSED DURING: 12 growth stages; CONTAINS InterPro DOMAIN/s: Zinc finger, PHD-type, conserved site (InterPro:IPR019786); BEST Arabidopsis thaliana protein match is: PHD finger family protein (TAIR:AT3G17460.1); Has 56 Blast hits to 56 proteins in 17 species: Archae - 0; Bacteria - 2; Metazoa - 0; Fungi - 4; Plants…	1e-29	NA	NA
Glyma.17G067400	0.972331	0.00155133	AT4G30340.1|Symbols:ATDGK7, DGK7|diacylglycerol kinase 7|chr4:14838465-14840941 REVERSE LENGTH=492	0	GO:0007205 GO:0031348 GO:0048364 GO:0048366	leaf development; negative regulation of defense response; protein kinase C-activating G-protein coupled receptor signaling pathway; root development
Glyma.17G084700	1.33441	0.00167308	AT4G24690.1|Symbols:|ubiquitin-associated (UBA)/TS-N domain-containing protein / octicosapeptide/Phox/Bemp1 (PB1) domain-containing protein|chr4:12741191-12744202 FORWARD LENGTH=704	2e-119	GO:0051258	protein polymerization
Glyma.17G104600	2.08672	0.00776648	AT2G46490.1|Symbols:|unknown protein; BEST Arabidopsis thaliana protein match is: unknown protein (TAIR:AT5G35110.1); Has 34 Blast hits to 34 proteins in 7 species: Archae - 0; Bacteria - 0; Metazoa - 1; Fungi - 0; Plants - 33; Viruses - 0; Other Eukaryotes - 0 (source: NCBI BLink).|chr2:19079457-19079861 FORWARD LENGTH=134	3e-18	GO:0006944 GO:0008150 GO:0048193	Golgi vesicle transport; biological process; cellular membrane fusion
Glyma.17G131200	1.73556	0.000137472	AT1G63100.1|Symbols:|GRAS family transcription factor|chr1:23399391-23401367 REVERSE LENGTH=658	0	GO:0000226 GO:0000911 GO:0006355 GO:0048451 GO:0048453	cytokinesis by cell plate formation; microtubule cytoskeleton organization; petal formation; regulation of transcription, DNA-dependent; sepal formation
Glyma.17G209900	1.74597	0.00551511	AT1G76680.1|Symbols:OPR1, ATOPR1|12-oxophytodienoate reductase 1|chr1:28776982-28778271 FORWARD LENGTH=372	2e-153	GO:0006629 GO:0009611 GO:0009751 GO:0010150 GO:0031407 GO:0046686 GO:0055114	leaf senescence; lipid metabolic process; oxidation-reduction process; oxylipin metabolic process; response to cadmium ion; response to salicylic acid stimulus; response to wounding
Glyma.17G259500	-2.25897	0.000364865	AT1G75900.1|Symbols:|GDSL-like Lipase/Acylhydrolase superfamily protein|chr1:28499179-28500943 FORWARD LENGTH=364	6e-132	GO:0006629 GO:0019761 GO:0019953	glucosinolate biosynthetic process; lipid metabolic process; sexual reproduction
Glyma.18G012600	3.59496	0.00158622	AT3G26120.1|Symbols:TEL1|terminal EAR1-like 1|chr3:9546398-9549186 FORWARD LENGTH=615	1e-141	NA	NA
Glyma.18G024700	1.03348	0.00134221	AT1G09870.1|Symbols:|histidine acid phosphatase family protein|chr1:3205817-3208444 FORWARD LENGTH=487	0	NA	NA
Glyma.18G031300	-1.52665	2.32e-05	AT2G39890.2|Symbols:PROT1, ATPROT1|proline transporter 1|chr2:16656022-16658202 FORWARD LENGTH=442	0	GO:0006865 GO:0015824	amino acid transport; proline transport
Glyma.18G067200	-1.00606	0.00237774	AT3G46970.1|Symbols:ATPHS2, PHS2|alpha-glucan phosphorylase 2|chr3:17301625-17306111 REVERSE LENGTH=841	0	GO:0005975 GO:0009414 GO:0019252 GO:0046686	carbohydrate metabolic process; response to cadmium ion; response to water deprivation; starch biosynthetic process
Glyma.18G073500	1.34749	0.00162861	AT3G44730.1|Symbols:ATKP1, KP1|kinesin-like protein 1|chr3:16285888-16290852 FORWARD LENGTH=1087	0	GO:0007018 GO:0009060	aerobic respiration; microtubule-based movement
Glyma.18G126500	1.98352	5.84e-05	AT1G69850.1|Symbols:ATNRT1:2, NTL1, NRT1:2|nitrate transporter 1:2|chr1:26296945-26300407 REVERSE LENGTH=585	0	GO:0009624 GO:0010119 GO:0080168	abscisic acid transport; regulation of stomatal movement; response to nematode
Glyma.18G146900	1.33666	0.00167308	AT5G10480.1|Symbols:PAS2, PEP|Protein-tyrosine phosphatase-like, PTPLA|chr5:3298047-3300048 REVERSE LENGTH=221	2e-119	GO:0000271 GO:0009825 GO:0009932 GO:0010817 GO:0019344 GO:0030154 GO:0042761 GO:0043481 GO:0048640 GO:0048767 GO:0050732 GO:0051302 GO:0071555	anthocyanin accumulation in tissues in response to UV light; cell differentiation; cell tip growth; cell wall organization; cysteine biosynthetic process; multidimensional cell growth; negative regulation of developmental growth; negative regulation of peptidyl-tyrosine phosphorylation; polysaccharide biosynthetic process; regulation of cell division; regulation of hormone levels; root hair elong…
Glyma.18G192000	-1.7226	0.00988259	AT1G07400.1|Symbols:|HSP20-like chaperones superfamily protein|chr1:2275148-2275621 FORWARD LENGTH=157	2e-37	GO:0006979 GO:0009408	response to heat; response to oxidative stress
Glyma.18G210700	-4.09425	5.09e-06	AT2G40435.1|Symbols:|BEST Arabidopsis thaliana protein match is: transcription regulators (TAIR:AT3G56220.1); Has 289 Blast hits to 289 proteins in 30 species: Archae - 0; Bacteria - 0; Metazoa - 0; Fungi - 0; Plants - 289; Viruses - 0; Other Eukaryotes - 0 (source: NCBI BLink).|chr2:16887048-16888407 FORWARD LENGTH=158	4e-50	NA	NA
Glyma.18G210900	1.21051	0.00295816	AT2G38540.1|Symbols:LP1, LTP1, ATLTP1|lipid transfer protein 1|chr2:16130418-16130893 FORWARD LENGTH=118	4e-24	GO:0006869	lipid transport
Glyma.19G033800	1.98521	0.00423292	AT5G15650.1|Symbols:RGP2, ATRGP2|reversibly glycosylated polypeptide 2|chr5:5092203-5094093 FORWARD LENGTH=360	0	GO:0009651 GO:0030244 GO:0033356 GO:0046686 GO:0071555	UDP-L-arabinose metabolic process; cell wall organization; cellulose biosynthetic process; response to cadmium ion; response to salt stress
Glyma.19G083600	1.33882	0.00138324	AT3G01750.1|Symbols:|Ankyrin repeat family protein|chr3:270615-272691 FORWARD LENGTH=664	0	GO:0008150	biological process
Glyma.19G112900	1.97581	2.32e-05	AT3G03860.1|Symbols:ATAPRL5, APRL5|APR-like 5|chr3:992465-994315 FORWARD LENGTH=300	1e-90	GO:0045454	cell redox homeostasis
Glyma.19G172800	2.36154	0.00771598	AT2G37540.1|Symbols:|NAD(P)-binding Rossmann-fold superfamily protein|chr2:15751695-15753820 REVERSE LENGTH=321	4e-160	GO:0008152 GO:0009860	metabolic process; pollen tube growth
Glyma.19G201000	1.09881	0.00673609	AT3G11760.1|Symbols:|unknown protein; FUNCTIONS IN: molecular_function unknown; INVOLVED IN: biological_process unknown; LOCATED IN: cellular_component unknown; EXPRESSED IN: 23 plant structures; EXPRESSED DURING: 14 growth stages; BEST Arabidopsis thaliana protein match is: unknown protein (TAIR:AT5G04860.1); Has 84 Blast hits to 73 proteins in 13 species: Archae - 0; Bacteria - 0; Metazoa - 0; …	0	GO:0008150	biological process
Glyma.19G218300	2.43351	0.000503387	AT2G47240.2|Symbols:LACS1|AMP-dependent synthetase and ligase family protein|chr2:19393835-19397616 FORWARD LENGTH=660	0	GO:0001676 GO:0006631 GO:0006633 GO:0009627 GO:0010025 GO:0010103 GO:0010143 GO:0034976	cutin biosynthetic process; fatty acid biosynthetic process; fatty acid metabolic process; long-chain fatty acid metabolic process; response to endoplasmic reticulum stress; stomatal complex morphogenesis; systemic acquired resistance; wax biosynthetic process
Glyma.19G222500	-1.49193	0.00503069	AT3G62040.1|Symbols:|Haloacid dehalogenase-like hydrolase (HAD) superfamily protein|chr3:22975328-22976518 REVERSE LENGTH=249	2e-124	GO:0010167 GO:0015706	nitrate transport; response to nitrate
Glyma.19G240800	5.10177	0.000436667	AT1G13710.1|Symbols:CYP78A5, KLU|cytochrome P450, family 78, subfamily A, polypeptide 5|chr1:4702932-4704592 REVERSE LENGTH=517	0	GO:0008284 GO:0010075 GO:0010338 GO:0035265 GO:0040009 GO:0046622 GO:0048437 GO:0055114	floral organ development; leaf formation; organ growth; oxidation-reduction process; positive regulation of cell proliferation; positive regulation of organ growth; regulation of growth rate; regulation of meristem growth
Glyma.20G000200	2.585	0.00780314	AT1G05620.1|Symbols:URH2|uridine-ribohydrolase 2|chr1:1679286-1681527 FORWARD LENGTH=322	0	GO:0006148 GO:0010150	inosine catabolic process; leaf senescence
Glyma.20G021500	-1.58084	0.00260908	AT4G19840.1|Symbols:ATPP2-A1, ATPP2A-1, PP2-A1|phloem protein 2-A1|chr4:10774336-10775701 FORWARD LENGTH=246	6e-63	GO:0006612 GO:0006833 GO:0009625 GO:0009651 GO:0009750 GO:0009963 GO:0010363	positive regulation of flavonoid biosynthetic process; protein targeting to membrane; regulation of plant-type hypersensitive response; response to fructose stimulus; response to insect; response to salt stress; water transport
Glyma.20G026700	-1.93359	0.00278684	AT3G29320.1|Symbols:|Glycosyl transferase, family 35|chr3:11252871-11257587 FORWARD LENGTH=962	0	GO:0005975 GO:0009266 GO:0009409 GO:0009414 GO:0019252 GO:0042742	carbohydrate metabolic process; defense response to bacterium; response to cold; response to temperature stimulus; response to water deprivation; starch biosynthetic process
Glyma.20G049800	1.42643	0.00101988	AT3G43720.2|Symbols:|Bifunctional inhibitor/lipid-transfer protein/seed storage 2S albumin superfamily protein|chr3:15615549-15617099 REVERSE LENGTH=191	2e-26	GO:0000038 GO:0006869 GO:0042335 GO:0042546	cell wall biogenesis; cuticle development; lipid transport; very long-chain fatty acid metabolic process
Glyma.20G080900	1.46862	3.54e-05	AT2G34260.1|Symbols:|transducin family protein / WD-40 repeat family protein|chr2:14465899-14468416 FORWARD LENGTH=353	1e-111	GO:0009220 GO:0009553 GO:0009793 GO:0009855 GO:0009960 GO:0010197	determination of bilateral symmetry; embryo development ending in seed dormancy; embryo sac development; endosperm development; polar nucleus fusion; pyrimidine ribonucleotide biosynthetic process
Glyma.20G089900	1.42864	0.00305806	NA	NA	NA	NA
Glyma.20G115500	1.74972	0.000357538	AT1G68530.1|Symbols:CUT1, POP1, CER6, G2, KCS6|3-ketoacyl-CoA synthase 6|chr1:25712881-25714733 REVERSE LENGTH=497	0	GO:0000038 GO:0000096 GO:0000271 GO:0006546 GO:0006633 GO:0006636 GO:0006733 GO:0006766 GO:0008152 GO:0008610 GO:0008652 GO:0009072 GO:0009106 GO:0009108 GO:0009117 GO:0009409 GO:0009416 GO:0009637 GO:0009644 GO:0009695 GO:0009744 GO:0009793 GO:0009825 GO:0009826 GO:0009932 GO:0010025 GO:0010027 GO:0010114 GO:0010155 GO:0010218 GO:0010228 GO:0010817 GO:0015994 GO:0015995 GO:0016117 GO:0016226 GO:…	anthocyanin accumulation in tissues in response to UV light; aromatic amino acid family metabolic process; carotenoid biosynthetic process; cell tip growth; cell wall organization; cellular amino acid biosynthetic process; chlorophyll biosynthetic process; chlorophyll metabolic process; coenzyme biosynthetic process; cuticle development; defense response to bacterium; embryo development ending in…
Glyma.20G132300	2.3965	0.00774936	AT2G23090.1|Symbols:|Uncharacterised protein family SERF|chr2:9829657-9830274 REVERSE LENGTH=78	1e-39	GO:0008150	biological process
Glyma.20G136600	4.38088	0.00682107	AT5G60440.1|Symbols:AGL62|AGAMOUS-like 62|chr5:24306329-24307520 FORWARD LENGTH=299	5e-45	GO:0009960	endosperm development
Glyma.20G232700	2.89929	0.00187058	AT5G64330.1|Symbols:NPH3, RPT3, JK218|Phototropic-responsive NPH3 family protein|chr5:25727568-25730225 FORWARD LENGTH=746	4e-122	GO:0000271 GO:0009416 GO:0009637 GO:0009638 GO:0009664 GO:0009785 GO:0009825 GO:0009832 GO:0009932 GO:0010155 GO:0010817 GO:0016567 GO:0043481 GO:0046777 GO:0048767 GO:0071555	anthocyanin accumulation in tissues in response to UV light; blue light signaling pathway; cell tip growth; cell wall organization; multidimensional cell growth; phototropism; plant-type cell wall biogenesis; plant-type cell wall organization; polysaccharide biosynthetic process; protein autophosphorylation; protein ubiquitination; regulation of hormone levels; regulation of proton transport; res…
Glyma.U025800	-1.62167	0.0044845	AT1G53160.1|Symbols:SPL4|squamosa promoter binding protein-like 4|chr1:19806478-19807080 FORWARD LENGTH=174	3e-39	GO:0006355 GO:0010321	regulation of transcription, DNA-dependent; regulation of vegetative phase change
Glyma.U037000	2.06528	0.00306663	AT1G68760.1|Symbols:ATNUDT1, ATNUDX1, NUDX1|nudix hydrolase _x0001_1|chr1:25829090-25829607 FORWARD LENGTH=147	5e-27	GO:0006974	response to DNA damage stimulus

## Sheet: TS3_Leaf120Min
Table S3. Genes significantly differentially expressed in leaves 120 minutes post iron stress. Glyma2.0 ID refers to Glycine max version 2.0 release, data is sorted by Glyma 2.0 ID. For more information see http://www.phytozome.net/soybean.php. The top A. thaliana hit (TAIR version 10) was determined by BLASTP of Glyma2.0 primary proteins against A. thaliana proteins (TAIR10, E<10-6). Gene ontolo…
Glyma 2.0 ID	Log 2 Fold Change (Deficient/Sufficient)	False Discovery Rate	Top Arabidopsis (TAIR10) BLASTP Hit	E-value (E<10-6)	Gene Ontology Biological Process IDs	Gene Ontology Biological Process Descriptions
Glyma.01G000300	-2.31036	0.0075122	NA	NA	NA	NA
Glyma.01G001200	-2.92249	2.7e-06	AT2G07170.1|Symbols:|ARM repeat superfamily protein|chr2:2975565-2978692 FORWARD LENGTH=820	0	GO:0000910 GO:0006270 GO:0006275 GO:0006346 GO:0006886 GO:0007017 GO:0008283 GO:0009909 GO:0016192 GO:0016458 GO:0031048 GO:0034968 GO:0051567 GO:0051726	DNA replication initiation; cell proliferation; chromatin silencing by small RNA; cytokinesis; gene silencing; histone H3-K9 methylation; histone lysine methylation; intracellular protein transport; methylation-dependent chromatin silencing; microtubule-based process; regulation of DNA replication; regulation of cell cycle; regulation of flower development; vesicle-mediated transport
Glyma.01G002000	3.09091	7e-07	AT5G20700.1|Symbols:|Protein of unknown function (DUF581)|chr5:7006178-7007003 REVERSE LENGTH=248	3e-16	GO:0006612 GO:0006816 GO:0006833 GO:0007030 GO:0008150 GO:0009651 GO:0009750 GO:0009963 GO:0010363	Golgi organization; biological process; calcium ion transport; positive regulation of flavonoid biosynthetic process; protein targeting to membrane; regulation of plant-type hypersensitive response; response to fructose stimulus; response to salt stress; water transport
Glyma.01G005800	1.85697	0.00400641	AT4G29310.1|Symbols:|Protein of unknown function (DUF1005)|chr4:14437892-14439609 REVERSE LENGTH=424	0	GO:0008150	biological process
Glyma.01G006800	-1.13008	0.00229926	AT5G19730.1|Symbols:|Pectin lyase-like superfamily protein|chr5:6670562-6673202 FORWARD LENGTH=383	0	GO:0009411 GO:0009813 GO:0042545	cell wall modification; flavonoid biosynthetic process; response to UV
Glyma.01G007800	-3.3166	2.79e-06	AT1G69770.1|Symbols:CMT3|chromomethylase 3|chr1:26248496-26253519 REVERSE LENGTH=839	0	GO:0006260 GO:0006261 GO:0006270 GO:0006275 GO:0006306 GO:0006342 GO:0006346 GO:0008283 GO:0009909 GO:0010069 GO:0010425 GO:0016458 GO:0016572 GO:0031047 GO:0031048 GO:0034968 GO:0045814 GO:0051567 GO:0051726	DNA-dependent DNA replication; DNA methylation; DNA methylation on cytosine within a CNG sequence; DNA replication; DNA replication initiation; cell proliferation; chromatin silencing; chromatin silencing by small RNA; gene silencing; gene silencing by RNA; histone H3-K9 methylation; histone lysine methylation; histone phosphorylation; methylation-dependent chromatin silencing; negative regulatio…
Glyma.01G009700	-1.37783	0.000627835	NA	NA	NA	NA
Glyma.01G011500	3.29928	4.07e-07	AT4G16070.1|Symbols:|Mono-/di-acylglycerol lipase, N-terminal;Lipase, class 3|chr4:9096808-9100596 REVERSE LENGTH=654	2e-87	GO:0006629 GO:0016042	lipid catabolic process; lipid metabolic process
Glyma.01G011800	2.98888	2.48e-05	NA	NA	NA	NA
Glyma.01G011900	-1.7404	0.00085273	AT3G18670.1|Symbols:|Ankyrin repeat family protein|chr3:6424135-6426471 REVERSE LENGTH=598	7e-90	NA	NA
Glyma.01G012100	-2.96326	1.13e-09	AT4G16070.1|Symbols:|Mono-/di-acylglycerol lipase, N-terminal;Lipase, class 3|chr4:9096808-9100596 REVERSE LENGTH=654	4e-118	GO:0006629 GO:0016042	lipid catabolic process; lipid metabolic process
Glyma.01G016100	-2.33986	0.00316965	AT1G05670.2|Symbols:|Pentatricopeptide repeat (PPR-like) superfamily protein|chr1:1698574-1700799 REVERSE LENGTH=741	2e-82	NA	NA
Glyma.01G017100	0.903127	0.00521515	AT2G23910.1|Symbols:|NAD(P)-binding Rossmann-fold superfamily protein|chr2:10177902-10179789 FORWARD LENGTH=304	2e-87	GO:0009744 GO:0009809 GO:0009813 GO:0010224 GO:0044237 GO:0080167	cellular metabolic process; flavonoid biosynthetic process; lignin biosynthetic process; response to UV-B; response to karrikin; response to sucrose stimulus
Glyma.01G018000	2.23488	1.52e-05	NA	NA	NA	NA
Glyma.01G018100	1.06655	0.00931002	NA	NA	NA	NA
Glyma.01G018800	1.71857	0.000403809	AT5G46790.1|Symbols:PYL1, RCAR12|PYR1-like 1|chr5:18984063-18984728 REVERSE LENGTH=221	8e-91	GO:0006569 GO:0009684 GO:0009738 GO:0019761 GO:0080163	abscisic acid mediated signaling pathway; glucosinolate biosynthetic process; indoleacetic acid biosynthetic process; regulation of protein serine/threonine phosphatase activity; tryptophan catabolic process
Glyma.01G020900	0.847543	0.0055781	AT4G37980.1|Symbols:ELI3-1, ELI3, ATCAD7, CAD7|elicitor-activated gene 3-1|chr4:17852670-17854302 FORWARD LENGTH=357	5e-177	GO:0009617 GO:0009626 GO:0009809 GO:0055114	lignin biosynthetic process; oxidation-reduction process; plant-type hypersensitive response; response to bacterium
Glyma.01G021200	-2.54312	0.000175627	AT2G22610.2|Symbols:|Di-glucose binding protein with Kinesin motor domain|chr2:9599550-9604626 FORWARD LENGTH=1062	0	GO:0000226 GO:0000278 GO:0000911 GO:0006306 GO:0006342 GO:0009909 GO:0016458 GO:0016570 GO:0016572 GO:0031047 GO:0034968 GO:0048449 GO:0048451 GO:0048453 GO:0051567	DNA methylation; chromatin silencing; cytokinesis by cell plate formation; floral organ formation; gene silencing; gene silencing by RNA; histone H3-K9 methylation; histone lysine methylation; histone modification; histone phosphorylation; microtubule cytoskeleton organization; mitotic cell cycle; petal formation; regulation of flower development; sepal formation
Glyma.01G022100	-1.33922	0.000722813	AT5G54640.1|Symbols:HTA1, RAT5, ATHTA1|Histone superfamily protein|chr5:22196540-22197279 FORWARD LENGTH=130	2e-82	GO:0006334 GO:0009294 GO:0009611 GO:0009617	DNA mediated transformation; nucleosome assembly; response to bacterium; response to wounding
Glyma.01G023300	1.15529	1.94e-05	AT5G65470.1|Symbols:|O-fucosyltransferase family protein|chr5:26172432-26174904 FORWARD LENGTH=504	0	GO:0008150	biological process
Glyma.01G025000	-1.71778	0.000224401	AT4G24660.1|Symbols:ATHB22, MEE68, HB22, ZHD2|homeobox protein 22|chr4:12724851-12725513 REVERSE LENGTH=220	1e-66	GO:0009686 GO:0009737 GO:0009740 GO:0009793 GO:0009845 GO:0010162 GO:0048608	embryo development ending in seed dormancy; gibberellic acid mediated signaling pathway; gibberellin biosynthetic process; reproductive structure development; response to abscisic acid stimulus; seed dormancy process; seed germination
Glyma.01G031300	-2.1631	0.000535416	AT1G23790.1|Symbols:|Plant protein of unknown function (DUF936)|chr1:8410099-8411917 FORWARD LENGTH=518	0	GO:0000226 GO:0000911 GO:0008150 GO:0008283 GO:0048451 GO:0048453	biological process; cell proliferation; cytokinesis by cell plate formation; microtubule cytoskeleton organization; petal formation; sepal formation
Glyma.01G031800	1.05189	0.00547708	AT1G70300.1|Symbols:KUP6|K+ uptake permease 6|chr1:26477993-26481233 REVERSE LENGTH=782	0	GO:0006813 GO:0071805	potassium ion transmembrane transport; potassium ion transport
Glyma.01G032000	0.907282	0.00430351	AT1G70280.2|Symbols:|NHL domain-containing protein|chr1:26466086-26468471 REVERSE LENGTH=509	0	GO:0000394 GO:0008150 GO:0009086	RNA splicing, via endonucleolytic cleavage and ligation; biological process; methionine biosynthetic process
Glyma.01G035100	1.39374	6.02e-08	AT1G07420.1|Symbols:ATSMO2, SMO2-1|sterol 4-alpha-methyl-oxidase 2-1|chr1:2277910-2280033 FORWARD LENGTH=266	2e-168	GO:0006333 GO:0006633 GO:0016126 GO:0046520 GO:0055114	chromatin assembly or disassembly; fatty acid biosynthetic process; oxidation-reduction process; sphingoid biosynthetic process; sterol biosynthetic process
Glyma.01G037900	0.953921	0.00247061	AT1G70090.2|Symbols:GATL9, LGT8|glucosyl transferase family 8|chr1:26400927-26402099 FORWARD LENGTH=390	0	GO:0016051	carbohydrate biosynthetic process
Glyma.01G038100	-0.85415	0.00151453	AT1G70070.1|Symbols:EMB25, PDE317, ISE2|DEAD/DEAH box helicase, putative|chr1:26390016-26394148 REVERSE LENGTH=1171	0	GO:0009793 GO:0010497 GO:0016441 GO:0016556	embryo development ending in seed dormancy; mRNA modification; plasmodesmata-mediated intercellular transport; posttranscriptional gene silencing
Glyma.01G043000	-1.47126	1.49e-05	AT1G14410.1|Symbols:ATWHY1, PTAC1, WHY1|ssDNA-binding transcriptional regulator|chr1:4929352-4930810 REVERSE LENGTH=263	2e-75	GO:0006281 GO:0006952 GO:0032211	DNA repair; defense response; negative regulation of telomere maintenance via telomerase
Glyma.01G044300	-2.46976	1.5e-08	AT2G02820.2|Symbols:MYB88|myb domain protein 88|chr2:804716-807139 REVERSE LENGTH=484	3e-177	GO:0006355 GO:0010052	guard cell differentiation; regulation of transcription, DNA-dependent
Glyma.01G046400	-2.68532	6.26e-05	AT1G26840.1|Symbols:ORC6, ATORC6|origin recognition complex protein 6|chr1:9298822-9300603 FORWARD LENGTH=284	7e-131	GO:0006260 GO:0006261	DNA-dependent DNA replication; DNA replication
Glyma.01G052600	1.10793	0.003032	AT1G14000.1|Symbols:VIK|VH1-interacting kinase|chr1:4797606-4800043 FORWARD LENGTH=438	0	GO:0000165 GO:0006468 GO:0006612 GO:0007154 GO:0007165 GO:0009409 GO:0009414 GO:0009723 GO:0009733 GO:0009734 GO:0009738 GO:0009742 GO:0009753 GO:0009862 GO:0009863 GO:0009867 GO:0009966 GO:0010305 GO:0010363 GO:0030968 GO:0031348 GO:0035556 GO:0042538 GO:0043069 GO:0050832	MAPK cascade; abscisic acid mediated signaling pathway; auxin mediated signaling pathway; brassinosteroid mediated signaling pathway; cell communication; defense response to fungus; endoplasmic reticulum unfolded protein response; hyperosmotic salinity response; intracellular signal transduction; jasmonic acid mediated signaling pathway; leaf vascular tissue pattern formation; negative regulation…
Glyma.01G054100	-3.53077	1.62e-06	AT1G69400.1|Symbols:|Transducin/WD40 repeat-like superfamily protein|chr1:26087027-26088806 FORWARD LENGTH=314	1e-115	NA	NA
Glyma.01G058300	0.902286	0.000619394	AT1G18650.1|Symbols:PDCB3|plasmodesmata callose-binding protein 3|chr1:6419036-6420413 REVERSE LENGTH=184	1e-41	GO:0008150	biological process
Glyma.01G061100	4.18291	5.94e-08	AT1G13710.1|Symbols:CYP78A5, KLU|cytochrome P450, family 78, subfamily A, polypeptide 5|chr1:4702932-4704592 REVERSE LENGTH=517	0	GO:0008284 GO:0010075 GO:0010338 GO:0035265 GO:0040009 GO:0046622 GO:0048437 GO:0055114	floral organ development; leaf formation; organ growth; oxidation-reduction process; positive regulation of cell proliferation; positive regulation of organ growth; regulation of growth rate; regulation of meristem growth
Glyma.01G062000	1.07152	0.000176052	AT1G13700.1|Symbols:PGL1|6-phosphogluconolactonase 1|chr1:4694475-4695600 REVERSE LENGTH=268	2e-128	GO:0005975 GO:0006098	carbohydrate metabolic process; pentose-phosphate shunt
Glyma.01G062100	-2.39718	2.67e-06	AT1G69200.1|Symbols:FLN2|fructokinase-like 2|chr1:26016018-26018365 FORWARD LENGTH=616	0	GO:0006364 GO:0006399 GO:0009220 GO:0009658 GO:0009662 GO:0042793 GO:0045036 GO:0045893	chloroplast organization; etioplast organization; positive regulation of transcription, DNA-dependent; protein targeting to chloroplast; pyrimidine ribonucleotide biosynthetic process; rRNA processing; tRNA metabolic process; transcription from plastid promoter
Glyma.01G063700	1.40996	0.00816888	AT1G69170.1|Symbols:|Squamosa promoter-binding protein-like (SBP domain) transcription factor family protein|chr1:26005626-26007041 FORWARD LENGTH=405	1e-64	GO:0006355 GO:0010468 GO:0042742	defense response to bacterium; regulation of gene expression; regulation of transcription, DNA-dependent
Glyma.01G068000	-0.978722	0.0071681	AT2G04030.1|Symbols:CR88, EMB1956, HSP90.5, Hsp88.1, AtHsp90.5|Chaperone protein htpG family protein|chr2:1281983-1285909 FORWARD LENGTH=780	0	GO:0006457 GO:0009408 GO:0009414 GO:0009651 GO:0009658 GO:0009704 GO:0009793 GO:0010157 GO:0045037 GO:0048481	chloroplast organization; de-etiolation; embryo development ending in seed dormancy; ovule development; protein folding; protein import into chloroplast stroma; response to chlorate; response to heat; response to salt stress; response to water deprivation
Glyma.01G071300	1.09502	0.00243115	AT3G25570.2|Symbols:|Adenosylmethionine decarboxylase family protein|chr3:9287413-9288462 REVERSE LENGTH=349	3e-172	GO:0006597 GO:0008295	spermidine biosynthetic process; spermine biosynthetic process
Glyma.01G073400	-1.80842	0.00658249	AT2G44980.2|Symbols:|SNF2 domain-containing protein / helicase domain-containing protein|chr2:18552343-18556669 REVERSE LENGTH=877	0	NA	NA
Glyma.01G081300	-1.01253	0.00083861	AT1G68560.1|Symbols:ATXYL1, XYL1, TRG1|alpha-xylosidase 1|chr1:25734435-25737897 REVERSE LENGTH=915	0	GO:0000272 GO:0005975 GO:0005982 GO:0009664 GO:0009832 GO:0010411 GO:0045493 GO:0046686	carbohydrate metabolic process; plant-type cell wall biogenesis; plant-type cell wall organization; polysaccharide catabolic process; response to cadmium ion; starch metabolic process; xylan catabolic process; xyloglucan metabolic process
Glyma.01G083000	1.33772	3.19e-05	AT1G13340.1|Symbols:|Regulator of Vps4 activity in the MVB pathway protein|chr1:4569622-4571043 REVERSE LENGTH=409	1e-90	GO:0006979 GO:0009697 GO:0009863 GO:0031348 GO:0045087	innate immune response; negative regulation of defense response; response to oxidative stress; salicylic acid biosynthetic process; salicylic acid mediated signaling pathway
Glyma.01G083100	-2.82555	0.000198903	AT1G13330.1|Symbols:AHP2|Arabidopsis Hop2 homolog|chr1:4568008-4569410 FORWARD LENGTH=226	1e-117	GO:0006261 GO:0006302 GO:0010332 GO:0051026	DNA-dependent DNA replication; chiasma assembly; double-strand break repair; response to gamma radiation
Glyma.01G084800	1.75874	0.00141861	AT1G25530.1|Symbols:|Transmembrane amino acid transporter family protein|chr1:8964827-8967391 REVERSE LENGTH=440	0	GO:0006865	amino acid transport
Glyma.01G093900	-1.99112	0.00263403	AT1G26170.1|Symbols:|ARM repeat superfamily protein|chr1:9047539-9054438 REVERSE LENGTH=1022	5e-67	GO:0000059 GO:0000226 GO:0000911 GO:0006886	cytokinesis by cell plate formation; intracellular protein transport; microtubule cytoskeleton organization; protein import into nucleus, docking
Glyma.01G095500	-0.86733	0.00320172	AT5G46690.1|Symbols:bHLH071|beta HLH protein 71|chr5:18945639-18947434 FORWARD LENGTH=327	6e-69	GO:0006355	regulation of transcription, DNA-dependent
Glyma.01G097900	1.27584	0.000106456	AT2G22680.1|Symbols:|Zinc finger (C3HC4-type RING finger) family protein|chr2:9645433-9647484 FORWARD LENGTH=683	1e-147	GO:0009062 GO:0009690 GO:0016132	brassinosteroid biosynthetic process; cytokinin metabolic process; fatty acid catabolic process
Glyma.01G099000	-1.65621	2.38e-06	AT3G51840.1|Symbols:ACX4, ATSCX, ATG6|acyl-CoA oxidase 4|chr3:19225653-19229008 REVERSE LENGTH=436	1e-32	GO:0006623 GO:0006635 GO:0007030 GO:0007033 GO:0008152 GO:0009793 GO:0016192 GO:0016558 GO:0044265 GO:0046459 GO:0055114	Golgi organization; cellular macromolecule catabolic process; embryo development ending in seed dormancy; fatty acid beta-oxidation; metabolic process; oxidation-reduction process; protein import into peroxisome matrix; protein targeting to vacuole; short-chain fatty acid metabolic process; vacuole organization; vesicle-mediated transport
Glyma.01G100000	-2.29746	0.0012375	AT5G02110.1|Symbols:CYCD7;1, CYCD7|CYCLIN D7;1|chr5:417087-418553 FORWARD LENGTH=341	4e-42	GO:0009790 GO:0051726	embryo development; regulation of cell cycle
Glyma.01G109100	-0.759385	0.00738592	AT3G09210.1|Symbols:PTAC13|plastid transcriptionally active 13|chr3:2825422-2826850 REVERSE LENGTH=333	2e-116	GO:0006655 GO:0009902 GO:0010027 GO:0019288 GO:0032968 GO:0034660 GO:0042793 GO:0045893	chloroplast relocation; isopentenyl diphosphate biosynthetic process, mevalonate-independent pathway; ncRNA metabolic process; phosphatidylglycerol biosynthetic process; positive regulation of transcription, DNA-dependent; positive regulation of transcription elongation from RNA polymerase II promoter; thylakoid membrane organization; transcription from plastid promoter
Glyma.01G109700	-1.37701	0.00206385	AT3G54090.1|Symbols:FLN1|fructokinase-like 1|chr3:20028145-20029835 FORWARD LENGTH=471	0	GO:0006364 GO:0006399 GO:0009658 GO:0009793 GO:0010027 GO:0010228 GO:0016226 GO:0042793 GO:0045893 GO:0048481	chloroplast organization; embryo development ending in seed dormancy; iron-sulfur cluster assembly; ovule development; positive regulation of transcription, DNA-dependent; rRNA processing; tRNA metabolic process; thylakoid membrane organization; transcription from plastid promoter; vegetative to reproductive phase transition of meristem
Glyma.01G112900	1.30798	0.00540698	AT5G01210.1|Symbols:|HXXXD-type acyl-transferase family protein|chr5:84554-85981 FORWARD LENGTH=475	0	NA	NA
Glyma.01G113200	1.1466	0.00692704	AT2G38110.1|Symbols:ATGPAT6, GPAT6|glycerol-3-phosphate acyltransferase 6|chr2:15952816-15955364 REVERSE LENGTH=501	0	GO:0006655 GO:0008152 GO:0009908 GO:0010143	cutin biosynthetic process; flower development; metabolic process; phosphatidylglycerol biosynthetic process
Glyma.01G114800	-0.932113	0.00605547	AT2G38140.1|Symbols:PSRP4|plastid-specific ribosomal protein 4|chr2:15980948-15981459 FORWARD LENGTH=118	6e-26	GO:0006412 GO:0032544	plastid translation; translation
Glyma.01G123500	2.36328	0.00145655	NA	NA	NA	NA
Glyma.01G125800	-2.37392	6.76e-07	AT3G51740.1|Symbols:IMK2|inflorescence meristem receptor-like kinase 2|chr3:19189248-19191842 FORWARD LENGTH=836	0	GO:0006468 GO:0007169 GO:0008283	cell proliferation; protein phosphorylation; transmembrane receptor protein tyrosine kinase signaling pathway
Glyma.01G127500	-1.20086	0.00243852	AT3G51670.1|Symbols:|SEC14 cytosolic factor family protein / phosphoglyceride transfer family protein|chr3:19168912-19170848 FORWARD LENGTH=409	0	GO:0006810	transport
Glyma.01G132000	1.51049	0.000275094	AT3G51630.2|Symbols:WNK5|with no lysine (K) kinase 5|chr3:19149487-19151924 FORWARD LENGTH=549	0	GO:0006468 GO:0048573	photoperiodism, flowering; protein phosphorylation
Glyma.01G132600	-2.37781	0.00301769	AT2G38540.1|Symbols:LP1, LTP1, ATLTP1|lipid transfer protein 1|chr2:16130418-16130893 FORWARD LENGTH=118	1e-27	GO:0006869	lipid transport
Glyma.01G132700	-5.27704	3.58e-09	AT2G04865.1|Symbols:|Aminotransferase-like, plant mobile domain family protein|chr2:1712149-1714599 FORWARD LENGTH=667	2e-16	GO:0008150	biological process
Glyma.01G137000	-2.7826	0.00465665	AT3G60660.1|Symbols:|unknown protein; CONTAINS InterPro DOMAIN/s: Protein of unknown function DUF1395 (InterPro:IPR009829); Has 131 Blast hits to 131 proteins in 44 species: Archae - 0; Bacteria - 0; Metazoa - 83; Fungi - 0; Plants - 45; Viruses - 0; Other Eukaryotes - 3 (source: NCBI BLink).|chr3:22421481-22423167 FORWARD LENGTH=272	2e-136	GO:0006261 GO:0008150	DNA-dependent DNA replication; biological process
Glyma.01G137200	-1.03193	0.00136473	AT2G45190.1|Symbols:AFO, FIL, YAB1|Plant-specific transcription factor YABBY family protein|chr2:18628450-18630552 REVERSE LENGTH=229	1e-97	GO:0006333 GO:0009737 GO:0009793 GO:0009845 GO:0009909 GO:0009933 GO:0009944 GO:0010027 GO:0010093 GO:0010103 GO:0010154 GO:0010158 GO:0010159 GO:0010162 GO:0010228 GO:0010450 GO:0016226 GO:0045165 GO:0048481	abaxial cell fate specification; cell fate commitment; chromatin assembly or disassembly; embryo development ending in seed dormancy; fruit development; inflorescence meristem growth; iron-sulfur cluster assembly; meristem structural organization; ovule development; polarity specification of adaxial/abaxial axis; regulation of flower development; response to abscisic acid stimulus; seed dormancy …
Glyma.01G140100	-1.16824	0.00192292	AT3G16780.1|Symbols:|Ribosomal protein L19e family protein|chr3:5708982-5710249 FORWARD LENGTH=209	4e-105	GO:0001510 GO:0006342 GO:0006412 GO:0009165 GO:0009220 GO:0042254 GO:0051567	RNA methylation; chromatin silencing; histone H3-K9 methylation; nucleotide biosynthetic process; pyrimidine ribonucleotide biosynthetic process; ribosome biogenesis; translation
Glyma.01G143100	-1.15037	0.00346128	AT4G12080.1|Symbols:AHL1, ATAHL1|AT-hook motif nuclear-localized protein 1|chr4:7239466-7241246 FORWARD LENGTH=356	2e-97	GO:0016132	brassinosteroid biosynthetic process
Glyma.01G152900	2.76165	0.000677972	AT4G19380.1|Symbols:|Long-chain fatty alcohol dehydrogenase family protein|chr4:10568427-10572288 REVERSE LENGTH=726	0	GO:0055114	oxidation-reduction process
Glyma.01G153300	1.8582	0.00648554	AT4G19230.1|Symbols:CYP707A1|cytochrome P450, family 707, subfamily A, polypeptide 1|chr4:10521524-10523517 FORWARD LENGTH=467	0	GO:0009639 GO:0009687 GO:0048838 GO:0050832 GO:0055114	abscisic acid metabolic process; defense response to fungus; oxidation-reduction process; release of seed from dormancy; response to red or far red light
Glyma.01G154800	1.9865	0.000104372	AT1G79660.1|Symbols:|unknown protein; BEST Arabidopsis thaliana protein match is: unknown protein (TAIR:AT1G16170.1); Has 30201 Blast hits to 17322 proteins in 780 species: Archae - 12; Bacteria - 1396; Metazoa - 17338; Fungi - 3422; Plants - 5037; Viruses - 0; Other Eukaryotes - 2996 (source: NCBI BLink).|chr1:29976294-29976575 FORWARD LENGTH=93	3e-26	GO:0008150	biological process
Glyma.01G159100	-2.02967	0.0072039	AT4G39530.1|Symbols:|Tetratricopeptide repeat (TPR)-like superfamily protein|chr4:18374736-18377240 REVERSE LENGTH=834	2e-140	GO:0008150	biological process
Glyma.01G159700	-2.29556	4.2e-05	AT1G20610.1|Symbols:CYCB2;3|Cyclin B2;3|chr1:7135073-7137273 REVERSE LENGTH=429	2e-170	GO:0000079 GO:0051726	regulation of cell cycle; regulation of cyclin-dependent protein serine/threonine kinase activity
Glyma.01G160300	-3.60607	7.64e-12	AT1G80740.1|Symbols:CMT1, DMT4|chromomethylase 1|chr1:30342394-30346831 FORWARD LENGTH=791	0	GO:0006306 GO:0009294	DNA mediated transformation; DNA methylation
Glyma.01G168300	1.3691	0.00722086	NA	NA	NA	NA
Glyma.01G169400	-1.48369	0.00185461	AT5G66320.2|Symbols:GATA5|GATA transcription factor 5|chr5:26496208-26497309 REVERSE LENGTH=339	5e-77	GO:0006355 GO:0045893	positive regulation of transcription, DNA-dependent; regulation of transcription, DNA-dependent
Glyma.01G169500	-1.62727	0.000568749	AT5G66330.1|Symbols:|Leucine-rich repeat (LRR) family protein|chr5:26500531-26501787 REVERSE LENGTH=418	3e-154	GO:0007165	signal transduction
Glyma.01G170300	1.07271	0.000697184	AT3G51030.1|Symbols:ATTRX1, ATTRX H1, TRX1|thioredoxin H-type 1|chr3:18951123-18951955 REVERSE LENGTH=114	3e-63	GO:0006662 GO:0043085 GO:0045454	cell redox homeostasis; glycerol ether metabolic process; positive regulation of catalytic activity
Glyma.01G175300	-1.89943	0.000729961	AT5G66750.1|Symbols:DDM1, CHR01, CHR1, CHA1, SOM4, SOM1, ATDDM1|chromatin remodeling 1|chr5:26649050-26652869 FORWARD LENGTH=764	0	GO:0006342 GO:0006344 GO:0006346 GO:0006349 GO:0008283 GO:0009294 GO:0016246 GO:0016572 GO:0031048 GO:0032197 GO:0044030 GO:0051567 GO:0051574 GO:0090241	DNA mediated transformation; RNA interference; cell proliferation; chromatin silencing; chromatin silencing by small RNA; histone H3-K9 methylation; histone phosphorylation; maintenance of chromatin silencing; methylation-dependent chromatin silencing; negative regulation of histone H4 acetylation; positive regulation of histone H3-K9 methylation; regulation of DNA methylation; regulation of gene…
Glyma.01G180400	-3.44716	1.27e-19	AT5G66590.1|Symbols:|CAP (Cysteine-rich secretory proteins, Antigen 5, and Pathogenesis-related 1 protein) superfamily protein|chr5:26574255-26574812 FORWARD LENGTH=185	8e-52	GO:0008150	biological process
Glyma.01G181700	-2.99389	0.00183733	AT2G23530.1|Symbols:|Zinc-finger domain of monoamine-oxidase A repressor R1|chr2:10020652-10022804 REVERSE LENGTH=552	9e-104	GO:0008150	biological process
Glyma.01G184600	2.52686	8.95e-13	AT4G37080.3|Symbols:|Protein of unknown function, DUF547|chr4:17473719-17476716 FORWARD LENGTH=610	0	GO:0008150	biological process
Glyma.01G185500	2.85091	0.00208621	AT5G66800.1|Symbols:|unknown protein; BEST Arabidopsis thaliana protein match is: unknown protein (TAIR:AT3G50640.1); Has 1807 Blast hits to 1807 proteins in 277 species: Archae - 0; Bacteria - 0; Metazoa - 736; Fungi - 347; Plants - 385; Viruses - 0; Other Eukaryotes - 339 (source: NCBI BLink).|chr5:26671433-26672116 FORWARD LENGTH=183	9e-26	GO:0008150	biological process
Glyma.01G185600	2.07616	0.000960475	AT2G15680.1|Symbols:|Calcium-binding EF-hand family protein|chr2:6831024-6831587 FORWARD LENGTH=187	6e-46	GO:0008150	biological process
Glyma.01G186600	1.29375	0.000330086	AT5G42930.1|Symbols:|alpha/beta-Hydrolases superfamily protein|chr5:17210738-17214152 REVERSE LENGTH=467	1e-175	GO:0006629	lipid metabolic process
Glyma.01G187300	1.46559	2.12e-06	AT4G02630.1|Symbols:|Protein kinase superfamily protein|chr4:1151683-1153161 FORWARD LENGTH=492	0	GO:0006468 GO:0007623 GO:0042546 GO:0046777	cell wall biogenesis; circadian rhythm; protein autophosphorylation; protein phosphorylation
Glyma.01G187400	-1.91835	1.42e-05	AT5G67100.1|Symbols:ICU2|DNA-directed DNA polymerases|chr5:26776994-26785104 FORWARD LENGTH=1524	0	GO:0000076 GO:0000278 GO:0000724 GO:0000731 GO:0000911 GO:0003002 GO:0006260 GO:0006261 GO:0006269 GO:0006270 GO:0006271 GO:0006275 GO:0006306 GO:0007155 GO:0008283 GO:0009910 GO:0009965 GO:0010090 GO:0010389 GO:0033043 GO:0042023 GO:0045010 GO:0048449 GO:0051567 GO:0051726	DNA-dependent DNA replication; DNA endoreduplication; DNA methylation; DNA replication; DNA replication, synthesis of RNA primer; DNA replication checkpoint; DNA replication initiation; DNA strand elongation involved in DNA replication; DNA synthesis involved in DNA repair; actin nucleation; cell adhesion; cell proliferation; cytokinesis by cell plate formation; double-strand break repair via hom…
Glyma.01G187600	-2.14124	0.00275101	AT4G36930.1|Symbols:SPT|basic helix-loop-helix (bHLH) DNA-binding superfamily protein|chr4:17414167-17415945 FORWARD LENGTH=373	8e-51	GO:0006355 GO:0007623 GO:0009409 GO:0009908 GO:0010114 GO:0010154 GO:0010187 GO:0048440	carpel development; circadian rhythm; flower development; fruit development; negative regulation of seed germination; regulation of transcription, DNA-dependent; response to cold; response to red light
Glyma.01G188000	-0.977158	0.00151837	AT2G23380.1|Symbols:CLF, ICU1, SDG1, SET1|SET domain-containing protein|chr2:9955570-9960117 FORWARD LENGTH=902	0	GO:0006306 GO:0006349 GO:0009294 GO:0009965 GO:0010048 GO:0010228 GO:0016571 GO:0031047 GO:0045857 GO:0051567	DNA mediated transformation; DNA methylation; gene silencing by RNA; histone H3-K9 methylation; histone methylation; leaf morphogenesis; negative regulation of molecular function, epigenetic; regulation of gene expression by genetic imprinting; vegetative to reproductive phase transition of meristem; vernalization response
Glyma.01G190000	-2.64675	0.000384305	AT5G67270.1|Symbols:ATEB1C, EB1C, ATEB1H1|end binding protein 1C|chr5:26840248-26841984 REVERSE LENGTH=329	2e-153	GO:0000278 GO:0009652 GO:0010228 GO:0016572 GO:0030865	cortical cytoskeleton organization; histone phosphorylation; mitotic cell cycle; thigmotropism; vegetative to reproductive phase transition of meristem
Glyma.01G190900	1.13799	2.23e-05	AT4G37450.1|Symbols:AGP18, ATAGP18|arabinogalactan protein _x0001_18|chr4:17605926-17606734 REVERSE LENGTH=209	7e-14	NA	NA
Glyma.01G192700	2.22913	0.000619644	NA	NA	NA	NA
Glyma.01G192900	-1.20019	4.15e-05	NA	NA	NA	NA
Glyma.01G193500	-3.00083	8.76e-06	AT1G64960.1|Symbols:|ARM repeat superfamily protein|chr1:24129918-24134049 FORWARD LENGTH=1203	0	NA	NA
Glyma.01G196800	2.1741	5.29e-11	AT5G65730.1|Symbols:XTH6|xyloglucan endotransglucosylase/hydrolase 6|chr5:26299080-26300290 FORWARD LENGTH=292	2e-169	GO:0005975 GO:0006073 GO:0009269 GO:0009409 GO:0009414 GO:0009651 GO:0009737	carbohydrate metabolic process; cellular glucan metabolic process; response to abscisic acid stimulus; response to cold; response to desiccation; response to salt stress; response to water deprivation
Glyma.01G205400	-0.901516	0.002532	AT4G17560.1|Symbols:|Ribosomal protein L19 family protein|chr4:9780343-9781752 FORWARD LENGTH=225	4e-71	GO:0006412 GO:0010267 GO:0019288 GO:0035196 GO:0042254 GO:0051607	defense response to virus; isopentenyl diphosphate biosynthetic process, mevalonate-independent pathway; production of miRNAs involved in gene silencing by miRNA; production of ta-siRNAs involved in RNA interference; ribosome biogenesis; translation
Glyma.01G206100	-3.07446	0.000473709	AT4G16807.1|Symbols:|unknown protein; FUNCTIONS IN: molecular_function unknown; INVOLVED IN: biological_process unknown; LOCATED IN: cellular_component unknown; BEST Arabidopsis thaliana protein match is: unknown protein (TAIR:AT3G33528.1); Has 30201 Blast hits to 17322 proteins in 780 species: Archae - 12; Bacteria - 1396; Metazoa - 17338; Fungi - 3422; Plants - 5037; Viruses - 0; Other Eukaryot…	1e-29	GO:0008150	biological process
Glyma.01G208000	0.831207	0.00521253	AT4G17360.1|Symbols:|Formyl transferase|chr4:9703698-9705468 REVERSE LENGTH=328	1e-159	GO:0000023 GO:0006189 GO:0009058 GO:0009152 GO:0009853 GO:0019252 GO:0043085 GO:0046653	de novo' IMP biosynthetic process; biosynthetic process; maltose metabolic process; photorespiration; positive regulation of catalytic activity; purine ribonucleotide biosynthetic process; starch biosynthetic process; tetrahydrofolate metabolic process
Glyma.01G208200	1.85028	0.00470769	AT5G47450.1|Symbols:ATTIP2;3, TIP2;3, DELTA-TIP3|tonoplast intrinsic protein 2;3|chr5:19248509-19249466 REVERSE LENGTH=250	3e-130	GO:0000041 GO:0006810 GO:0006826 GO:0006833 GO:0009651 GO:0010106 GO:0010167 GO:0010413 GO:0015706 GO:0045492 GO:0055085	cellular response to iron ion starvation; glucuronoxylan metabolic process; iron ion transport; nitrate transport; response to nitrate; response to salt stress; transition metal ion transport; transmembrane transport; transport; water transport; xylan biosynthetic process
Glyma.01G209500	-2.92463	6.72e-15	AT5G47500.1|Symbols:|Pectin lyase-like superfamily protein|chr5:19271262-19272845 REVERSE LENGTH=362	0	GO:0016572 GO:0042545	cell wall modification; histone phosphorylation
Glyma.01G210700	-1.97286	0.00235409	AT1G62520.1|Symbols:|unknown protein; BEST Arabidopsis thaliana protein match is: unknown protein (TAIR:AT4G12450.1); Has 388 Blast hits to 388 proteins in 26 species: Archae - 0; Bacteria - 1; Metazoa - 0; Fungi - 8; Plants - 376; Viruses - 0; Other Eukaryotes - 3 (source: NCBI BLink).|chr1:23144506-23145348 FORWARD LENGTH=280	6e-92	GO:0008150	biological process
Glyma.01G213800	-2.27067	7.69e-06	AT4G22860.1|Symbols:|Cell cycle regulated microtubule associated protein|chr4:11997735-12001281 FORWARD LENGTH=509	5e-133	GO:0000226 GO:0000911 GO:0006342 GO:0006346 GO:0008150 GO:0009909 GO:0016458 GO:0031048 GO:0034968 GO:0042127 GO:0051567	biological process; chromatin silencing; chromatin silencing by small RNA; cytokinesis by cell plate formation; gene silencing; histone H3-K9 methylation; histone lysine methylation; methylation-dependent chromatin silencing; microtubule cytoskeleton organization; regulation of cell proliferation; regulation of flower development
Glyma.01G218400	1.14586	0.0048797	AT5G23850.1|Symbols:|Arabidopsis thaliana protein of unknown function (DUF821)|chr5:8038126-8040741 FORWARD LENGTH=542	0	GO:0008150	biological process
Glyma.01G219500	1.61995	3.94e-08	AT1G63460.1|Symbols:GPX8, ATGPX8|glutathione peroxidase 8|chr1:23535118-23536326 FORWARD LENGTH=167	3e-23	GO:0006979 GO:0009407	response to oxidative stress; toxin catabolic process
Glyma.01G221600	-1.98928	7.79e-09	AT5G41460.1|Symbols:|Protein of unknown function (DUF604)|chr5:16589724-16592197 REVERSE LENGTH=524	0	GO:0008150	biological process
Glyma.01G223000	-2.15284	0.000659099	AT1G64080.1|Symbols:|unknown protein; FUNCTIONS IN: molecular_function unknown; INVOLVED IN: biological_process unknown; LOCATED IN: plasma membrane; BEST Arabidopsis thaliana protein match is: unknown protein (TAIR:AT5G52870.1); Has 1546 Blast hits to 738 proteins in 176 species: Archae - 0; Bacteria - 143; Metazoa - 278; Fungi - 131; Plants - 95; Viruses - 4; Other Eukaryotes - 895 (source: NCB…	4e-65	GO:0008150	biological process
Glyma.01G227400	-0.890867	0.00529873	AT5G08280.1|Symbols:HEMC|hydroxymethylbilane synthase|chr5:2663763-2665596 REVERSE LENGTH=382	0	GO:0006098 GO:0006364 GO:0006744 GO:0006779 GO:0009073 GO:0009409 GO:0009697 GO:0009814 GO:0009965 GO:0015995 GO:0018160 GO:0019288 GO:0019344 GO:0019684 GO:0030154 GO:0033014 GO:0042742 GO:0045893	aromatic amino acid family biosynthetic process; cell differentiation; chlorophyll biosynthetic process; cysteine biosynthetic process; defense response, incompatible interaction; defense response to bacterium; isopentenyl diphosphate biosynthetic process, mevalonate-independent pathway; leaf morphogenesis; pentose-phosphate shunt; peptidyl-pyrromethane cofactor linkage; photosynthesis, light rea…
Glyma.01G227500	1.42779	0.0013391	NA	NA	NA	NA
Glyma.01G228000	-1.71596	0.00443322	AT4G20770.1|Symbols:|Pentatricopeptide repeat (PPR) superfamily protein|chr4:11130762-11133086 REVERSE LENGTH=774	0	GO:0008150	biological process
Glyma.01G229600	-2.20516	9.38e-05	AT4G33270.1|Symbols:CDC20.1|Transducin family protein / WD-40 repeat family protein|chr4:16044545-16046590 REVERSE LENGTH=457	0	GO:0007165	signal transduction
Glyma.01G230900	1.38564	3.01e-07	AT4G10040.1|Symbols:CYTC-2|cytochrome c-2|chr4:6277083-6278281 FORWARD LENGTH=112	7e-74	NA	NA
Glyma.01G233700	0.952228	0.00906985	AT1G11755.1|Symbols:LEW1|Undecaprenyl pyrophosphate synthetase family protein|chr1:3969987-3971488 REVERSE LENGTH=254	2e-80	GO:0006487 GO:0009414 GO:0009645 GO:0019408 GO:0030968	dolichol biosynthetic process; endoplasmic reticulum unfolded protein response; protein N-linked glycosylation; response to low light intensity stimulus; response to water deprivation
Glyma.01G236300	-3.16124	6.42e-19	AT4G14770.1|Symbols:TCX2, ATTCX2|TESMIN/TSO1-like CXC 2|chr4:8481522-8484825 REVERSE LENGTH=674	2e-162	GO:0006261 GO:0006355 GO:0010075 GO:0010103 GO:0042127	DNA-dependent DNA replication; regulation of cell proliferation; regulation of meristem growth; regulation of transcription, DNA-dependent; stomatal complex morphogenesis
Glyma.01G238000	-1.01593	0.00060298	AT4G14890.1|Symbols:FdC2|2Fe-2S ferredoxin-like superfamily protein|chr4:8520887-8521351 FORWARD LENGTH=154	6e-63	GO:0006098 GO:0006364 GO:0015995 GO:0019288 GO:0022900 GO:0045893	chlorophyll biosynthetic process; electron transport chain; isopentenyl diphosphate biosynthetic process, mevalonate-independent pathway; pentose-phosphate shunt; positive regulation of transcription, DNA-dependent; rRNA processing
Glyma.01G241200	1.96957	0.00130084	AT1G10020.1|Symbols:|Protein of unknown function (DUF1005)|chr1:3269939-3271732 REVERSE LENGTH=461	1e-122	GO:0008150	biological process
Glyma.01G243400	1.29499	0.000405564	NA	NA	NA	NA
Glyma.01G244700	-2.08411	4.28e-05	AT3G19210.1|Symbols:ATRAD54, CHR25, RAD54|homolog of RAD54|chr3:6652799-6658876 REVERSE LENGTH=910	0	GO:0000724 GO:0006281 GO:0006302 GO:0006310 GO:0006355 GO:0007126 GO:0007129 GO:0007131 GO:0007140 GO:0010212 GO:0010228 GO:0010332 GO:0016444 GO:0032204 GO:0043247 GO:0043687 GO:0045003 GO:0045893	DNA recombination; DNA repair; double-strand break repair; double-strand break repair via homologous recombination; double-strand break repair via synthesis-dependent strand annealing; male meiosis; meiosis; positive regulation of transcription, DNA-dependent; post-translational protein modification; reciprocal meiotic recombination; regulation of telomere maintenance; regulation of transcription…
Glyma.02G000500	1.45182	0.00066093	AT5G43700.1|Symbols:ATAUX2-11, IAA4|AUX/IAA transcriptional regulator family protein|chr5:17550465-17551206 FORWARD LENGTH=186	4e-79	GO:0006355 GO:0006417 GO:0007020 GO:0009733 GO:0009736 GO:0010583	cytokinin mediated signaling pathway; microtubule nucleation; regulation of transcription, DNA-dependent; regulation of translation; response to auxin stimulus; response to cyclopentenone
Glyma.02G003800	-3.7202	1.09e-09	AT4G14310.1|Symbols:|Transducin/WD40 repeat-like superfamily protein|chr4:8237137-8240324 REVERSE LENGTH=893	0	GO:0008150	biological process
Glyma.02G005200	-1.08395	0.0023794	AT1G04420.1|Symbols:|NAD(P)-linked oxidoreductase superfamily protein|chr1:1191634-1193699 FORWARD LENGTH=412	0	GO:0019288	isopentenyl diphosphate biosynthetic process, mevalonate-independent pathway
Glyma.02G009700	0.713611	0.00852952	AT1G02420.1|Symbols:|Pentatricopeptide repeat (PPR) superfamily protein|chr1:493683-495158 FORWARD LENGTH=491	0	GO:0008150	biological process
Glyma.02G010200	-0.964203	0.00412474	AT4G01935.1|Symbols:|unknown protein; FUNCTIONS IN: molecular_function unknown; INVOLVED IN: biological_process unknown; LOCATED IN: chloroplast; Has 37 Blast hits to 37 proteins in 17 species: Archae - 0; Bacteria - 0; Metazoa - 0; Fungi - 0; Plants - 30; Viruses - 0; Other Eukaryotes - 7 (source: NCBI BLink).|chr4:841102-842228 FORWARD LENGTH=256	4e-107	GO:0008150	biological process
Glyma.02G013500	-2.94081	1.43e-07	AT4G02110.1|Symbols:|transcription coactivators|chr4:935191-940191 FORWARD LENGTH=1329	6e-115	NA	NA
Glyma.02G015100	-2.1388	7.49e-09	AT2G30620.2|Symbols:|winged-helix DNA-binding transcription factor family protein|chr2:13045360-13046267 FORWARD LENGTH=202	5e-26	GO:0006334	nucleosome assembly
Glyma.02G015500	-1.85864	4.75e-08	AT2G47500.1|Symbols:|P-loop nucleoside triphosphate hydrolases superfamily protein with CH (Calponin Homology) domain|chr2:19493247-19497882 FORWARD LENGTH=983	0	GO:0007018	microtubule-based movement
Glyma.02G015600	2.38093	8.41e-11	AT3G16850.1|Symbols:|Pectin lyase-like superfamily protein|chr3:5748692-5750981 FORWARD LENGTH=455	0	GO:0005975 GO:0006816 GO:0007030 GO:0009637 GO:0009651 GO:0010155 GO:0046777 GO:0048767	Golgi organization; calcium ion transport; carbohydrate metabolic process; protein autophosphorylation; regulation of proton transport; response to blue light; response to salt stress; root hair elongation
Glyma.02G015800	1.21021	0.000169576	AT5G50950.2|Symbols:FUM2|FUMARASE 2|chr5:20729687-20733636 FORWARD LENGTH=499	0	GO:0006099 GO:0006106 GO:0009651 GO:0042128	fumarate metabolic process; nitrate assimilation; response to salt stress; tricarboxylic acid cycle
Glyma.02G016500	-3.40961	6.9e-12	AT4G02320.1|Symbols:|Plant invertase/pectin methylesterase inhibitor superfamily|chr4:1022725-1026118 REVERSE LENGTH=518	0	GO:0042545	cell wall modification
Glyma.02G017100	2.03464	5.92e-06	AT4G02380.1|Symbols:SAG21, AtLEA5|senescence-associated gene 21|chr4:1046414-1046807 REVERSE LENGTH=97	8e-21	GO:0000165 GO:0000302 GO:0006612 GO:0006979 GO:0007154 GO:0009409 GO:0009611 GO:0009738 GO:0009790 GO:0009862 GO:0009867 GO:0010363 GO:0016036 GO:0019375 GO:0030968 GO:0031348 GO:0042631 GO:0043069 GO:0050832	MAPK cascade; abscisic acid mediated signaling pathway; cell communication; cellular response to phosphate starvation; cellular response to water deprivation; defense response to fungus; embryo development; endoplasmic reticulum unfolded protein response; galactolipid biosynthetic process; jasmonic acid mediated signaling pathway; negative regulation of defense response; negative regulation of pr…
Glyma.02G019300	-1.08979	0.00521253	AT2G02820.2|Symbols:MYB88|myb domain protein 88|chr2:804716-807139 REVERSE LENGTH=484	5e-178	GO:0006355 GO:0010052	guard cell differentiation; regulation of transcription, DNA-dependent
Glyma.02G022500	-1.13303	0.00104846	AT1G27070.1|Symbols:|5'-AMP-activated protein kinase-related|chr1:9396945-9399225 REVERSE LENGTH=532	9e-122	NA	NA
Glyma.02G025200	1.12976	0.0023794	AT1G59650.1|Symbols:CW14|Protein of unknown function (DUF1336)|chr1:21920099-21922670 FORWARD LENGTH=492	0	GO:0006499	N-terminal protein myristoylation
Glyma.02G028000	-5.43505	1.18e-19	AT1G59970.1|Symbols:|Matrixin family protein|chr1:22073601-22074683 FORWARD LENGTH=360	3e-36	GO:0006508 GO:0008152	metabolic process; proteolysis
Glyma.02G028100	-4.42166	1.19e-09	AT1G59970.1|Symbols:|Matrixin family protein|chr1:22073601-22074683 FORWARD LENGTH=360	4e-39	GO:0006508 GO:0008152	metabolic process; proteolysis
Glyma.02G028400	-4.73906	1.59e-11	NA	NA	NA	NA
Glyma.02G028700	-2.65798	1.14e-06	AT1G59970.1|Symbols:|Matrixin family protein|chr1:22073601-22074683 FORWARD LENGTH=360	3e-41	GO:0006508 GO:0008152	metabolic process; proteolysis
Glyma.02G028800	-2.74374	2.16e-07	AT1G59970.1|Symbols:|Matrixin family protein|chr1:22073601-22074683 FORWARD LENGTH=360	9e-37	GO:0006508 GO:0008152	metabolic process; proteolysis
Glyma.02G029800	-1.03658	0.00519833	AT1G10510.1|Symbols:emb2004|RNI-like superfamily protein|chr1:3461771-3465590 FORWARD LENGTH=605	0	GO:0009793	embryo development ending in seed dormancy
Glyma.02G029900	-3.08832	0.000380147	AT1G24100.1|Symbols:UGT74B1|UDP-glucosyl transferase 74B1|chr1:8525547-8527010 REVERSE LENGTH=460	1e-164	GO:0006569 GO:0008152 GO:0009684 GO:0019761 GO:0042742 GO:0048767 GO:0052544	defense response by callose deposition in cell wall; defense response to bacterium; glucosinolate biosynthetic process; indoleacetic acid biosynthetic process; metabolic process; root hair elongation; tryptophan catabolic process
Glyma.02G030100	-0.919452	0.000926085	AT1G70200.1|Symbols:|RNA-binding (RRM/RBD/RNP motifs) family protein|chr1:26432514-26434351 REVERSE LENGTH=538	3e-55	GO:0006364 GO:0006399 GO:0009658 GO:0010027 GO:0045036	chloroplast organization; protein targeting to chloroplast; rRNA processing; tRNA metabolic process; thylakoid membrane organization
Glyma.02G030900	0.821424	0.00201468	AT1G07420.1|Symbols:ATSMO2, SMO2-1|sterol 4-alpha-methyl-oxidase 2-1|chr1:2277910-2280033 FORWARD LENGTH=266	4e-170	GO:0006333 GO:0006633 GO:0016126 GO:0046520 GO:0055114	chromatin assembly or disassembly; fatty acid biosynthetic process; oxidation-reduction process; sphingoid biosynthetic process; sterol biosynthetic process
Glyma.02G033600	1.4648	0.000251524	AT1G70300.1|Symbols:KUP6|K+ uptake permease 6|chr1:26477993-26481233 REVERSE LENGTH=782	0	GO:0006813 GO:0071805	potassium ion transmembrane transport; potassium ion transport
Glyma.02G034500	-2.1888	0.000804659	AT1G23790.1|Symbols:|Plant protein of unknown function (DUF936)|chr1:8410099-8411917 FORWARD LENGTH=518	0	GO:0000226 GO:0000911 GO:0008150 GO:0008283 GO:0048451 GO:0048453	biological process; cell proliferation; cytokinesis by cell plate formation; microtubule cytoskeleton organization; petal formation; sepal formation
Glyma.02G035000	1.21755	0.000804276	AT5G14740.2|Symbols:CA2, CA18, BETA CA2|carbonic anhydrase 2|chr5:4760536-4762382 FORWARD LENGTH=259	2e-133	GO:0000165 GO:0006612 GO:0009409 GO:0009595 GO:0009697 GO:0009814 GO:0009862 GO:0009867 GO:0010200 GO:0010310 GO:0010363 GO:0015976 GO:0019243 GO:0019684 GO:0031348 GO:0042742 GO:0043900 GO:0050832	MAPK cascade; carbon utilization; defense response, incompatible interaction; defense response to bacterium; defense response to fungus; detection of biotic stimulus; jasmonic acid mediated signaling pathway; methylglyoxal catabolic process to D-lactate; negative regulation of defense response; photosynthesis, light reaction; protein targeting to membrane; regulation of hydrogen peroxide metaboli…
Glyma.02G039700	1.33411	0.00112237	NA	NA	NA	NA
Glyma.02G040700	1.91351	0.00142948	AT2G22500.1|Symbols:UCP5, ATPUMP5, DIC1|uncoupling protein 5|chr2:9563531-9564472 REVERSE LENGTH=313	2e-168	GO:0006810 GO:0006839 GO:0010200 GO:0015992	mitochondrial transport; proton transport; response to chitin; transport
Glyma.02G042100	0.991826	0.00841176	AT4G35260.1|Symbols:IDH1, IDH-I|isocitrate dehydrogenase 1|chr4:16774494-16776233 REVERSE LENGTH=367	0	GO:0006096 GO:0006098 GO:0006099 GO:0006102 GO:0008152 GO:0009060 GO:0009651 GO:0009853 GO:0046686 GO:0055114	aerobic respiration; glycolysis; isocitrate metabolic process; metabolic process; oxidation-reduction process; pentose-phosphate shunt; photorespiration; response to cadmium ion; response to salt stress; tricarboxylic acid cycle
Glyma.02G043200	-2.57175	0.000136744	AT4G35730.1|Symbols:|Regulator of Vps4 activity in the MVB pathway protein|chr4:16931111-16933241 FORWARD LENGTH=466	1e-145	GO:0008150	biological process
Glyma.02G044600	1.95961	8.38e-06	AT5G54380.1|Symbols:THE1|protein kinase family protein|chr5:22077313-22079880 REVERSE LENGTH=855	4e-78	GO:0006468 GO:0009741 GO:0009742 GO:0009791 GO:0009826 GO:0046777 GO:0051510	brassinosteroid mediated signaling pathway; post-embryonic development; protein autophosphorylation; protein phosphorylation; regulation of unidimensional cell growth; response to brassinosteroid stimulus; unidimensional cell growth
Glyma.02G045100	1.87824	0.000343947	AT2G17760.1|Symbols:|Eukaryotic aspartyl protease family protein|chr2:7713488-7716269 FORWARD LENGTH=513	6e-170	GO:0006508 GO:0006865	amino acid transport; proteolysis
Glyma.02G045600	-2.1182	0.000710691	AT4G19350.1|Symbols:EMB3006|embryo defective 3006|chr4:10562214-10563676 REVERSE LENGTH=180	1e-44	GO:0009793	embryo development ending in seed dormancy
Glyma.02G045900	-2.79903	0.00132336	AT4G35930.1|Symbols:|F-box family protein|chr4:17019482-17020744 FORWARD LENGTH=321	1e-89	GO:0008150	biological process
Glyma.02G046200	-2.44849	6.24e-06	AT3G51280.1|Symbols:|Tetratricopeptide repeat (TPR)-like superfamily protein|chr3:19037229-19038781 FORWARD LENGTH=430	0	GO:0006260 GO:0006270 GO:0006275 GO:0006306 GO:0008283 GO:0051567 GO:0051726	DNA methylation; DNA replication; DNA replication initiation; cell proliferation; histone H3-K9 methylation; regulation of DNA replication; regulation of cell cycle
Glyma.02G047400	-3.87425	2.5e-06	AT4G38660.1|Symbols:|Pathogenesis-related thaumatin superfamily protein|chr4:18066448-18067984 REVERSE LENGTH=345	3e-108	GO:0009664 GO:0010075 GO:0042545 GO:0048653 GO:0051707	anther development; cell wall modification; plant-type cell wall organization; regulation of meristem growth; response to other organism
Glyma.02G048700	-2.44527	2.68e-06	AT5G66230.1|Symbols:|Chalcone-flavanone isomerase family protein|chr5:26462704-26463873 FORWARD LENGTH=329	2e-66	GO:0008283 GO:0009813 GO:0042398 GO:0048451 GO:0048453	cell proliferation; cellular modified amino acid biosynthetic process; flavonoid biosynthetic process; petal formation; sepal formation
Glyma.02G049200	1.71391	0.00252402	AT4G34760.1|Symbols:|SAUR-like auxin-responsive protein family|chr4:16582471-16582794 REVERSE LENGTH=107	2e-53	GO:0009733	response to auxin stimulus
Glyma.02G051600	0.851812	0.00577561	AT4G36380.1|Symbols:ROT3|Cytochrome P450 superfamily protein|chr4:17187973-17192202 REVERSE LENGTH=524	0	GO:0009965 GO:0010268 GO:0016132 GO:0042814 GO:0048366 GO:0048441 GO:0048443 GO:0055114	brassinosteroid biosynthetic process; brassinosteroid homeostasis; leaf development; leaf morphogenesis; monopolar cell growth; oxidation-reduction process; petal development; stamen development
Glyma.02G055900	1.91853	1.64e-06	AT4G39250.1|Symbols:ATRL1, RSM2, RL1|RAD-like 1|chr4:18271457-18271857 REVERSE LENGTH=100	1e-26	GO:0006355	regulation of transcription, DNA-dependent
Glyma.02G059500	0.873519	0.00257108	AT4G36850.1|Symbols:|PQ-loop repeat family protein / transmembrane family protein|chr4:17353415-17355822 REVERSE LENGTH=392	8e-162	GO:0008150	biological process
Glyma.02G063400	1.91818	0.000160964	AT2G23620.1|Symbols:ATMES1, MES1|methyl esterase 1|chr2:10047462-10049248 REVERSE LENGTH=263	9e-109	GO:0009627 GO:0009696 GO:0009817	defense response to fungus, incompatible interaction; salicylic acid metabolic process; systemic acquired resistance
Glyma.02G066800	1.15751	3.15e-05	AT3G19340.1|Symbols:|Protein of unknown function (DUF3754)|chr3:6701387-6704071 REVERSE LENGTH=487	0	NA	NA
Glyma.02G068400	1.09896	0.00258552	AT2G31600.1|Symbols:|unknown protein; FUNCTIONS IN: molecular_function unknown; INVOLVED IN: biological_process unknown; LOCATED IN: chloroplast; BEST Arabidopsis thaliana protein match is: unknown protein (TAIR:AT3G53860.1); Has 35333 Blast hits to 34131 proteins in 2444 species: Archae - 798; Bacteria - 22429; Metazoa - 974; Fungi - 991; Plants - 531; Viruses - 0; Other Eukaryotes - 9610 (sourc…	6e-56	GO:0008150	biological process
Glyma.02G068600	1.36716	5.82e-06	AT2G31600.1|Symbols:|unknown protein; FUNCTIONS IN: molecular_function unknown; INVOLVED IN: biological_process unknown; LOCATED IN: chloroplast; BEST Arabidopsis thaliana protein match is: unknown protein (TAIR:AT3G53860.1); Has 35333 Blast hits to 34131 proteins in 2444 species: Archae - 798; Bacteria - 22429; Metazoa - 974; Fungi - 991; Plants - 531; Viruses - 0; Other Eukaryotes - 9610 (sourc…	6e-56	GO:0008150	biological process
Glyma.02G069700	-2.29503	3.14e-05	AT1G08560.1|Symbols:SYP111, KN, ATSYP111|syntaxin of plants 111|chr1:2709778-2710710 REVERSE LENGTH=310	5e-127	GO:0000226 GO:0000910 GO:0000911 GO:0006084 GO:0006886 GO:0006944 GO:0008283 GO:0010583 GO:0016126 GO:0016192 GO:0051225	acetyl-CoA metabolic process; cell proliferation; cellular membrane fusion; cytokinesis; cytokinesis by cell plate formation; intracellular protein transport; microtubule cytoskeleton organization; response to cyclopentenone; spindle assembly; sterol biosynthetic process; vesicle-mediated transport
Glyma.02G069800	-4.13632	0.000134776	AT5G18290.2|Symbols:SIP1;2|Aquaporin-like superfamily protein|chr5:6055198-6056407 REVERSE LENGTH=243	3e-79	GO:0006810 GO:0046685	response to arsenic-containing substance; transport
Glyma.02G071300	-0.784808	0.00912695	AT5G18230.1|Symbols:|transcription regulator NOT2/NOT3/NOT5 family protein|chr5:6021610-6027031 REVERSE LENGTH=843	0	GO:0006355 GO:0045892	negative regulation of transcription, DNA-dependent; regulation of transcription, DNA-dependent
Glyma.02G071700	-1.5744	0.00710241	AT1G54385.2|Symbols:|ARM repeat superfamily protein|chr1:20301289-20303048 REVERSE LENGTH=560	0	GO:0000245 GO:0000398	mRNA splicing, via spliceosome; spliceosomal complex assembly
Glyma.02G073600	0.983515	0.00763377	AT2G37170.1|Symbols:PIP2B, PIP2;2|plasma membrane intrinsic protein 2|chr2:15613624-15614791 REVERSE LENGTH=285	1e-175	GO:0006810 GO:0006833 GO:0009414 GO:0009651 GO:0009737 GO:0055085	response to abscisic acid stimulus; response to salt stress; response to water deprivation; transmembrane transport; transport; water transport
Glyma.02G074400	1.65656	6.94e-06	AT1G34380.2|Symbols:|5'-3' exonuclease family protein|chr1:12552839-12554299 REVERSE LENGTH=347	2e-31	NA	NA
Glyma.02G074500	-2.87307	0.000398636	AT1G34355.1|Symbols:ATPS1, PS1|forkhead-associated (FHA) domain-containing protein|chr1:12536497-12541730 FORWARD LENGTH=1477	7e-77	GO:0006275 GO:0006306 GO:0006342 GO:0007267 GO:0008283 GO:0009555 GO:0009616 GO:0009909 GO:0010267 GO:0010389 GO:0016458 GO:0031047 GO:0034968 GO:0035196 GO:0048451 GO:0048453 GO:0051567	DNA methylation; cell-cell signaling; cell proliferation; chromatin silencing; gene silencing; gene silencing by RNA; histone H3-K9 methylation; histone lysine methylation; petal formation; pollen development; production of miRNAs involved in gene silencing by miRNA; production of ta-siRNAs involved in RNA interference; regulation of DNA replication; regulation of G2/M transition of mitotic cell …
Glyma.02G076700	1.47229	0.0047271	NA	NA	NA	NA
Glyma.02G078100	-1.21399	0.000132468	AT4G09730.1|Symbols:RH39|RH39|chr4:6136333-6139510 FORWARD LENGTH=621	0	GO:0006364 GO:0006399 GO:0009658 GO:0080158 GO:1901259	chloroplast organization; chloroplast rRNA processing; chloroplast ribulose bisphosphate carboxylase complex biogenesis; rRNA processing; tRNA metabolic process
Glyma.02G080700	-3.52297	2.31e-09	AT1G76740.1|Symbols:|unknown protein; BEST Arabidopsis thaliana protein match is: unknown protein (TAIR:AT1G76840.1); Has 3683 Blast hits to 2942 proteins in 407 species: Archae - 9; Bacteria - 440; Metazoa - 1472; Fungi - 269; Plants - 192; Viruses - 8; Other Eukaryotes - 1293 (source: NCBI BLink).|chr1:28805235-28810477 FORWARD LENGTH=1532	3e-10	GO:0008150 GO:0048451 GO:0048453	biological process; petal formation; sepal formation
Glyma.02G084100	-1.27051	0.00653008	AT5G42140.1|Symbols:|Regulator of chromosome condensation (RCC1) family with FYVE zinc finger domain|chr5:16837547-16841640 REVERSE LENGTH=1073	0	GO:0007165	signal transduction
Glyma.02G086100	-0.829014	0.00522642	AT1G14790.1|Symbols:RDR1, ATRDRP1|RNA-dependent RNA polymerase 1|chr1:5094317-5097817 REVERSE LENGTH=1107	0	GO:0000165 GO:0006355 GO:0006612 GO:0009615 GO:0009617 GO:0009751 GO:0009862 GO:0009867 GO:0010025 GO:0010310 GO:0010363 GO:0016441 GO:0031348 GO:0035304 GO:0060148	MAPK cascade; jasmonic acid mediated signaling pathway; negative regulation of defense response; positive regulation of posttranscriptional gene silencing; posttranscriptional gene silencing; protein targeting to membrane; regulation of hydrogen peroxide metabolic process; regulation of plant-type hypersensitive response; regulation of protein dephosphorylation; regulation of transcription, DNA-d…
Glyma.02G086200	-1.65933	0.000536362	AT1G68020.2|Symbols:ATTPS6, TPS6|UDP-Glycosyltransferase / trehalose-phosphatase family protein|chr1:25497493-25500241 FORWARD LENGTH=860	0	GO:0005992 GO:0008152	metabolic process; trehalose biosynthetic process
Glyma.02G087300	-1.06606	0.00245515	AT5G31412.1|Symbols:|hAT transposon superfamily protein|chr5:11541463-11543768 REVERSE LENGTH=433	1e-07	GO:0008150	biological process
Glyma.02G087700	-1.31616	0.000466882	AT5G51100.1|Symbols:FSD2|Fe superoxide dismutase 2|chr5:20773357-20775635 REVERSE LENGTH=305	1e-129	GO:0006364 GO:0006399 GO:0009411 GO:0009658 GO:0042793 GO:0045893 GO:0055114	chloroplast organization; oxidation-reduction process; positive regulation of transcription, DNA-dependent; rRNA processing; response to UV; tRNA metabolic process; transcription from plastid promoter
Glyma.02G088900	1.92911	4.7e-05	AT3G18280.1|Symbols:|Bifunctional inhibitor/lipid-transfer protein/seed storage 2S albumin superfamily protein|chr3:6267102-6267392 FORWARD LENGTH=96	3e-31	GO:0006612 GO:0006869 GO:0009963 GO:0010363	lipid transport; positive regulation of flavonoid biosynthetic process; protein targeting to membrane; regulation of plant-type hypersensitive response
Glyma.02G092700	-1.04886	0.00146387	AT3G55370.1|Symbols:OBP3|OBF-binding protein 3|chr3:20527198-20528876 FORWARD LENGTH=323	1e-44	GO:0006355 GO:0009640 GO:0045893	photomorphogenesis; positive regulation of transcription, DNA-dependent; regulation of transcription, DNA-dependent
Glyma.02G106600	-2.58345	0.00092562	AT1G26840.1|Symbols:ORC6, ATORC6|origin recognition complex protein 6|chr1:9298822-9300603 FORWARD LENGTH=284	9e-135	GO:0006260 GO:0006261	DNA-dependent DNA replication; DNA replication
Glyma.02G109500	2.08098	0.00135662	NA	NA	NA	NA
Glyma.02G112400	1.37478	5.66e-05	AT1G13950.1|Symbols:EIF-5A, ELF5A-1, ATELF5A-1, EIF5A|eukaryotic elongation factor 5A-1|chr1:4773631-4774668 FORWARD LENGTH=158	3e-100	GO:0006413 GO:0006452 GO:0008612 GO:0010089 GO:0045901 GO:0045905	peptidyl-lysine modification to hypusine; positive regulation of translational elongation; positive regulation of translational termination; translational frameshifting; translational initiation; xylem development
Glyma.02G112900	1.19558	0.000228354	AT2G03350.1|Symbols:|Protein of unknown function, DUF538|chr2:1019733-1021071 REVERSE LENGTH=179	3e-96	GO:0008150	biological process
Glyma.02G115200	1.50568	0.00418504	AT1G69310.2|Symbols:WRKY57, ATWRKY57|WRKY DNA-binding protein 57|chr1:26056118-26057909 REVERSE LENGTH=287	1e-73	GO:0006355 GO:0006970 GO:0009414 GO:0009651	regulation of transcription, DNA-dependent; response to osmotic stress; response to salt stress; response to water deprivation
Glyma.02G116100	0.971949	0.00130197	AT1G18650.1|Symbols:PDCB3|plasmodesmata callose-binding protein 3|chr1:6419036-6420413 REVERSE LENGTH=184	3e-41	GO:0008150	biological process
Glyma.02G120300	-2.98686	0.000564518	AT1G69200.1|Symbols:FLN2|fructokinase-like 2|chr1:26016018-26018365 FORWARD LENGTH=616	0	GO:0006364 GO:0006399 GO:0009220 GO:0009658 GO:0009662 GO:0042793 GO:0045036 GO:0045893	chloroplast organization; etioplast organization; positive regulation of transcription, DNA-dependent; protein targeting to chloroplast; pyrimidine ribonucleotide biosynthetic process; rRNA processing; tRNA metabolic process; transcription from plastid promoter
Glyma.02G121300	0.966144	0.00188178	AT1G69170.1|Symbols:|Squamosa promoter-binding protein-like (SBP domain) transcription factor family protein|chr1:26005626-26007041 FORWARD LENGTH=405	4e-63	GO:0006355 GO:0010468 GO:0042742	defense response to bacterium; regulation of gene expression; regulation of transcription, DNA-dependent
Glyma.02G124500	-1.54449	0.000303704	AT2G04030.1|Symbols:CR88, EMB1956, HSP90.5, Hsp88.1, AtHsp90.5|Chaperone protein htpG family protein|chr2:1281983-1285909 FORWARD LENGTH=780	0	GO:0006457 GO:0009408 GO:0009414 GO:0009651 GO:0009658 GO:0009704 GO:0009793 GO:0010157 GO:0045037 GO:0048481	chloroplast organization; de-etiolation; embryo development ending in seed dormancy; ovule development; protein folding; protein import into chloroplast stroma; response to chlorate; response to heat; response to salt stress; response to water deprivation
Glyma.02G126300	-1.30173	6.75e-05	AT1G26230.1|Symbols:|TCP-1/cpn60 chaperonin family protein|chr1:9072388-9075272 REVERSE LENGTH=611	0	GO:0000023 GO:0006457 GO:0006655 GO:0016556 GO:0019252 GO:0019288 GO:0042026 GO:0043085 GO:0044267	cellular protein metabolic process; isopentenyl diphosphate biosynthetic process, mevalonate-independent pathway; mRNA modification; maltose metabolic process; phosphatidylglycerol biosynthetic process; positive regulation of catalytic activity; protein folding; protein refolding; starch biosynthetic process
Glyma.02G127500	-1.49864	0.00824103	AT5G35630.3|Symbols:GS2, GLN2, ATGSL1|glutamine synthetase 2|chr5:13831220-13833239 FORWARD LENGTH=430	3e-40	GO:0006096 GO:0006098 GO:0006542 GO:0006807 GO:0006833 GO:0006972 GO:0007030 GO:0007568 GO:0009266 GO:0009409 GO:0009637 GO:0009644 GO:0009651 GO:0009744 GO:0009749 GO:0009750 GO:0010114 GO:0010155 GO:0010218 GO:0019344 GO:0019676 GO:0046686	Golgi organization; aging; ammonia assimilation cycle; cysteine biosynthetic process; glutamine biosynthetic process; glycolysis; hyperosmotic response; nitrogen compound metabolic process; pentose-phosphate shunt; regulation of proton transport; response to blue light; response to cadmium ion; response to cold; response to far red light; response to fructose stimulus; response to glucose stimulu…
Glyma.02G129100	-1.88123	2.75e-08	AT3G24140.1|Symbols:FMA|basic helix-loop-helix (bHLH) DNA-binding superfamily protein|chr3:8715525-8717772 REVERSE LENGTH=414	3e-144	GO:0000165 GO:0006355 GO:0006612 GO:0009617 GO:0009862 GO:0009867 GO:0009965 GO:0010052 GO:0010103 GO:0010310 GO:0010363 GO:0030154 GO:0031348 GO:0035304 GO:0045597 GO:0045893 GO:0051782	MAPK cascade; cell differentiation; guard cell differentiation; jasmonic acid mediated signaling pathway; leaf morphogenesis; negative regulation of cell division; negative regulation of defense response; positive regulation of cell differentiation; positive regulation of transcription, DNA-dependent; protein targeting to membrane; regulation of hydrogen peroxide metabolic process; regulation of …
Glyma.02G133900	-1.0361	0.00357185	AT3G48690.1|Symbols:ATCXE12, CXE12|alpha/beta-Hydrolases superfamily protein|chr3:18037186-18038160 REVERSE LENGTH=324	1e-79	GO:0008152	metabolic process
Glyma.02G135500	-1.53175	0.000111112	AT4G33950.1|Symbols:OST1, SNRK2-6, SRK2E, SNRK2.6, P44, ATOST1|Protein kinase superfamily protein|chr4:16272364-16274657 FORWARD LENGTH=362	0	GO:0005985 GO:0006468 GO:0006636 GO:0006970 GO:0009414 GO:0009651 GO:0009737 GO:0009738 GO:0010118 GO:0010119 GO:0019432 GO:0040007 GO:0042742 GO:0042744 GO:0048366 GO:2000377	abscisic acid mediated signaling pathway; defense response to bacterium; growth; hydrogen peroxide catabolic process; leaf development; protein phosphorylation; regulation of reactive oxygen species metabolic process; regulation of stomatal movement; response to abscisic acid stimulus; response to osmotic stress; response to salt stress; response to water deprivation; stomatal movement; sucrose m…
Glyma.02G135700	-3.01817	2.58e-09	AT3G19050.1|Symbols:POK2|phragmoplast orienting kinesin 2|chr3:6578047-6590106 FORWARD LENGTH=2771	0	GO:0000910 GO:0007018	cytokinesis; microtubule-based movement
Glyma.02G137400	1.33211	0.00455054	AT1G05710.5|Symbols:|basic helix-loop-helix (bHLH) DNA-binding superfamily protein|chr1:1716198-1717023 FORWARD LENGTH=149	9e-60	GO:0009723	response to ethylene stimulus
Glyma.02G137900	-2.23305	0.00118399	AT3G59680.2|Symbols:|unknown protein; FUNCTIONS IN: molecular_function unknown; INVOLVED IN: biological_process unknown; LOCATED IN: endomembrane system; EXPRESSED IN: 17 plant structures; EXPRESSED DURING: 13 growth stages; Has 34 Blast hits to 34 proteins in 10 species: Archae - 0; Bacteria - 0; Metazoa - 0; Fungi - 0; Plants - 34; Viruses - 0; Other Eukaryotes - 0 (source: NCBI BLink).|chr3:22…	2e-57	GO:0008150	biological process
Glyma.02G142400	1.27829	0.00169243	AT3G04730.1|Symbols:IAA16|indoleacetic acid-induced protein 16|chr3:1288993-1290415 REVERSE LENGTH=236	2e-29	GO:0006355 GO:0006970 GO:0009733 GO:0010583 GO:0046686	regulation of transcription, DNA-dependent; response to auxin stimulus; response to cadmium ion; response to cyclopentenone; response to osmotic stress
Glyma.02G143200	-3.42326	9.57e-09	AT3G54560.1|Symbols:HTA11|histone H2A 11|chr3:20196532-20197466 FORWARD LENGTH=136	7e-79	GO:0006338 GO:0009908 GO:0009909 GO:0010468 GO:0016048 GO:0042742 GO:0044030	chromatin remodeling; defense response to bacterium; detection of temperature stimulus; flower development; regulation of DNA methylation; regulation of flower development; regulation of gene expression
Glyma.02G147100	-2.98644	1.33e-05	AT3G63200.1|Symbols:PLP9, PLA IIIB|PATATIN-like protein 9|chr3:23346140-23347379 FORWARD LENGTH=384	0	GO:0006629 GO:0008152 GO:0010075	lipid metabolic process; metabolic process; regulation of meristem growth
Glyma.02G147200	-1.64742	4.26e-05	AT3G63130.2|Symbols:RANGAP1|RAN GTPase activating protein 1|chr3:23325108-23326715 FORWARD LENGTH=535	0	GO:0000072 GO:0000280 GO:0000910 GO:0000911 GO:0006346 GO:0006406 GO:0006606 GO:0006913 GO:0007000 GO:0009407 GO:0031048 GO:0048527 GO:0051567	M phase specific microtubule process; chromatin silencing by small RNA; cytokinesis; cytokinesis by cell plate formation; histone H3-K9 methylation; lateral root development; mRNA export from nucleus; methylation-dependent chromatin silencing; nuclear division; nucleocytoplasmic transport; nucleolus organization; protein import into nucleus; toxin catabolic process
Glyma.02G150500	1.29793	0.000969519	AT2G48030.1|Symbols:|DNAse I-like superfamily protein|chr2:19647834-19649988 REVERSE LENGTH=438	1e-135	NA	NA
Glyma.02G151000	-1.05616	0.00846037	AT4G03020.2|Symbols:|transducin family protein / WD-40 repeat family protein|chr4:1331704-1334472 REVERSE LENGTH=493	9e-142	GO:0008150	biological process
Glyma.02G151800	-1.93281	0.00141408	AT4G03100.1|Symbols:|Rho GTPase activating protein with PAK-box/P21-Rho-binding domain|chr4:1374361-1375913 FORWARD LENGTH=430	0	GO:0000226 GO:0000911 GO:0007165 GO:0008283	cell proliferation; cytokinesis by cell plate formation; microtubule cytoskeleton organization; signal transduction
Glyma.02G152400	-0.840487	0.00714852	AT2G47940.1|Symbols:DEGP2|DEGP protease 2|chr2:19618372-19622164 REVERSE LENGTH=607	0	GO:0006508 GO:0009658 GO:0010075 GO:0010206 GO:0019288 GO:0030163	chloroplast organization; isopentenyl diphosphate biosynthetic process, mevalonate-independent pathway; photosystem II repair; protein catabolic process; proteolysis; regulation of meristem growth
Glyma.02G152700	-0.790243	0.00161715	AT2G47900.2|Symbols:AtTLP3, TLP3|tubby like protein 3|chr2:19611196-19612766 REVERSE LENGTH=406	0	GO:0006355 GO:0009620 GO:0009651 GO:0042542 GO:0043687 GO:0045893 GO:0071470	cellular response to osmotic stress; positive regulation of transcription, DNA-dependent; post-translational protein modification; regulation of transcription, DNA-dependent; response to fungus; response to hydrogen peroxide; response to salt stress
Glyma.02G153000	1.46207	0.000826454	AT2G47880.1|Symbols:|Glutaredoxin family protein|chr2:19605124-19605432 FORWARD LENGTH=102	1e-49	GO:0045454 GO:0048653	anther development; cell redox homeostasis
Glyma.02G153500	1.5101	0.000508017	AT1G03010.1|Symbols:|Phototropic-responsive NPH3 family protein|chr1:693480-696188 FORWARD LENGTH=634	0	GO:0009416 GO:0009860	pollen tube growth; response to light stimulus
Glyma.02G157700	-3.76724	2.95e-09	AT3G57060.2|Symbols:|binding|chr3:21115078-21121051 REVERSE LENGTH=1415	0	GO:0000910 GO:0007017 GO:0007067 GO:0009957 GO:0030261	chromosome condensation; cytokinesis; epidermal cell fate specification; microtubule-based process; mitosis
Glyma.02G162500	-0.852124	0.00127301	AT3G56680.1|Symbols:|Single-stranded nucleic acid binding R3H protein|chr3:20991537-20993446 FORWARD LENGTH=353	2e-117	GO:0008150 GO:0015995	biological process; chlorophyll biosynthetic process
Glyma.02G166500	1.05736	9.77e-05	AT5G06560.1|Symbols:|Protein of unknown function, DUF593|chr5:2003678-2005543 REVERSE LENGTH=518	5e-166	GO:0008150	biological process
Glyma.02G168400	0.978049	0.0066445	AT3G11950.2|Symbols:|TRAF-like superfamily protein|chr3:3783273-3785098 REVERSE LENGTH=572	2e-145	GO:0016117	carotenoid biosynthetic process
Glyma.02G171300	-1.61357	0.00385183	AT5G06710.1|Symbols:HAT14|homeobox from Arabidopsis thaliana|chr5:2068305-2070284 REVERSE LENGTH=336	4e-87	GO:0006355	regulation of transcription, DNA-dependent
Glyma.02G172800	1.51231	7.06e-06	AT3G53750.1|Symbols:ACT3|actin 3|chr3:19915924-19917371 FORWARD LENGTH=377	0	GO:0007010	cytoskeleton organization
Glyma.02G174700	-1.78231	0.00264419	AT4G27510.1|Symbols:|unknown protein; Has 25 Blast hits to 23 proteins in 8 species: Archae - 0; Bacteria - 0; Metazoa - 0; Fungi - 0; Plants - 25; Viruses - 0; Other Eukaryotes - 0 (source: NCBI BLink).|chr4:13746284-13748996 REVERSE LENGTH=728	7e-85	GO:0008150 GO:0048451 GO:0048453	biological process; petal formation; sepal formation
Glyma.02G178400	-1.30199	0.00682733	AT5G06790.1|Symbols:|unknown protein; FUNCTIONS IN: molecular_function unknown; INVOLVED IN: biological_process unknown; LOCATED IN: chloroplast; EXPRESSED IN: 9 plant structures; EXPRESSED DURING: LP.04 four leaves visible, LP.02 two leaves visible, petal differentiation and expansion stage, D bilateral stage; BEST Arabidopsis thaliana protein match is: unknown protein (TAIR:AT3G57950.1); Has 18…	3e-34	GO:0008150	biological process
Glyma.02G181600	-2.49538	0.000542344	AT3G57600.1|Symbols:|Integrase-type DNA-binding superfamily protein|chr3:21332841-21333674 FORWARD LENGTH=277	4e-79	GO:0006355 GO:0010093 GO:0048440 GO:0048507	carpel development; meristem development; regulation of transcription, DNA-dependent; specification of floral organ identity
Glyma.02G182400	1.32708	2.86e-06	AT3G57550.1|Symbols:AGK2, GK-2|guanylate kinase|chr3:21307269-21309193 FORWARD LENGTH=389	2e-170	GO:0006163 GO:0009117 GO:0010200 GO:0030968 GO:0050832	defense response to fungus; endoplasmic reticulum unfolded protein response; nucleotide metabolic process; purine nucleotide metabolic process; response to chitin
Glyma.02G188300	0.77908	0.0057168	AT5G06530.1|Symbols:|ABC-2 type transporter family protein|chr5:1990060-1994605 REVERSE LENGTH=751	0	GO:0009414 GO:0010148	response to water deprivation; transpiration
Glyma.02G189100	-1.49272	0.0098778	AT5G13420.1|Symbols:|Aldolase-type TIM barrel family protein|chr5:4302080-4304212 REVERSE LENGTH=438	3e-136	GO:0006096 GO:0009060 GO:0009809 GO:0033587 GO:0046686	aerobic respiration; glycolysis; lignin biosynthetic process; response to cadmium ion; shikimate biosynthetic process
Glyma.02G192600	0.880751	0.00151619	AT2G35880.1|Symbols:|TPX2 (targeting protein for Xklp2) protein family|chr2:15063204-15065259 REVERSE LENGTH=432	4e-54	GO:0016126 GO:0052541 GO:0052546	cell wall pectin metabolic process; plant-type cell wall cellulose metabolic process; sterol biosynthetic process
Glyma.02G193500	2.9008	0.00597706	AT4G24050.1|Symbols:|NAD(P)-binding Rossmann-fold superfamily protein|chr4:12497287-12499661 FORWARD LENGTH=332	1e-35	GO:0008152	metabolic process
Glyma.02G200500	-1.42997	0.006664	AT5G06250.2|Symbols:|AP2/B3-like transcriptional factor family protein|chr5:1892714-1894058 REVERSE LENGTH=282	5e-65	GO:0006355 GO:0009062 GO:0010073 GO:0010358 GO:0045892 GO:0048366	fatty acid catabolic process; leaf development; leaf shaping; meristem maintenance; negative regulation of transcription, DNA-dependent; regulation of transcription, DNA-dependent
Glyma.02G201300	-0.678998	0.00974464	AT3G11540.1|Symbols:SPY|Tetratricopeptide repeat (TPR)-like superfamily protein|chr3:3632842-3637547 FORWARD LENGTH=914	0	GO:0000278 GO:0000956 GO:0006346 GO:0006355 GO:0006396 GO:0009736 GO:0009740 GO:0009938 GO:0016246 GO:0043687 GO:0045893 GO:2000377	RNA interference; RNA processing; cytokinin mediated signaling pathway; gibberellic acid mediated signaling pathway; methylation-dependent chromatin silencing; mitotic cell cycle; negative regulation of gibberellic acid mediated signaling pathway; nuclear-transcribed mRNA catabolic process; positive regulation of transcription, DNA-dependent; post-translational protein modification; regulation of…
Glyma.02G201600	-1.27707	0.00405905	AT5G06130.2|Symbols:|chaperone protein dnaJ-related|chr5:1853754-1855763 REVERSE LENGTH=315	3e-140	NA	NA
Glyma.02G202000	-2.24425	0.00809327	AT3G52610.1|Symbols:|unknown protein; Has 68 Blast hits to 67 proteins in 21 species: Archae - 0; Bacteria - 11; Metazoa - 0; Fungi - 0; Plants - 55; Viruses - 0; Other Eukaryotes - 2 (source: NCBI BLink).|chr3:19510513-19512547 FORWARD LENGTH=475	8e-129	GO:0008150	biological process
Glyma.02G204700	1.1115	0.000292598	AT4G30610.1|Symbols:BRS1, SCPL24|alpha/beta-Hydrolases superfamily protein|chr4:14944219-14948391 FORWARD LENGTH=465	0	GO:0006508 GO:0009742	brassinosteroid mediated signaling pathway; proteolysis
Glyma.02G206000	1.03902	0.00166968	AT4G30710.1|Symbols:QWRF8|Family of unknown function (DUF566) _x0001_|chr4:14965538-14967881 REVERSE LENGTH=644	2e-178	GO:0008150	biological process
Glyma.02G206100	1.22634	0.0088927	AT3G18430.2|Symbols:|Calcium-binding EF-hand family protein|chr3:6326180-6327476 FORWARD LENGTH=175	1e-47	GO:0006499 GO:0030048 GO:0051645 GO:0051646 GO:0060151	Golgi localization; N-terminal protein myristoylation; actin filament-based movement; mitochondrion localization; peroxisome localization
Glyma.02G206700	-1.01019	0.00367235	AT2G24090.1|Symbols:|Ribosomal protein L35|chr2:10242038-10243416 FORWARD LENGTH=145	5e-43	GO:0006098 GO:0006412	pentose-phosphate shunt; translation
Glyma.02G207900	-1.3456	0.000389623	AT2G23820.2|Symbols:|Metal-dependent phosphohydrolase|chr2:10140595-10142672 FORWARD LENGTH=257	7e-104	NA	NA
Glyma.02G209100	-0.865014	0.00895844	AT1G22460.1|Symbols:|O-fucosyltransferase family protein|chr1:7927530-7930351 REVERSE LENGTH=565	0	GO:0008150	biological process
Glyma.02G211900	-1.9274	0.00316775	AT4G24660.1|Symbols:ATHB22, MEE68, HB22, ZHD2|homeobox protein 22|chr4:12724851-12725513 REVERSE LENGTH=220	1e-68	GO:0009686 GO:0009737 GO:0009740 GO:0009793 GO:0009845 GO:0010162 GO:0048608	embryo development ending in seed dormancy; gibberellic acid mediated signaling pathway; gibberellin biosynthetic process; reproductive structure development; response to abscisic acid stimulus; seed dormancy process; seed germination
Glyma.02G214300	-0.770825	0.00634621	AT5G60930.1|Symbols:|P-loop containing nucleoside triphosphate hydrolases superfamily protein|chr5:24515398-24522511 REVERSE LENGTH=1294	0	GO:0000911 GO:0007018 GO:0008283	cell proliferation; cytokinesis by cell plate formation; microtubule-based movement
Glyma.02G215800	1.34587	0.00861136	AT1G58250.1|Symbols:SAB|Golgi-body localisation protein domain ;RNA pol II promoter Fmp27 protein domain|chr1:21587317-21601373 REVERSE LENGTH=2607	0	GO:0009723 GO:0009825 GO:0016049	cell growth; multidimensional cell growth; response to ethylene stimulus
Glyma.02G217500	2.56872	0.000815164	AT5G64430.1|Symbols:|Octicosapeptide/Phox/Bem1p family protein|chr5:25762540-25764081 REVERSE LENGTH=513	2e-49	GO:0008150	biological process
Glyma.02G217800	2.13226	0.00985771	AT5G65640.1|Symbols:bHLH093|beta HLH protein 93|chr5:26237137-26238904 FORWARD LENGTH=351	7e-77	NA	NA
Glyma.02G221600	1.34865	0.00546204	AT1G18010.1|Symbols:|Major facilitator superfamily protein|chr1:6199980-6201359 FORWARD LENGTH=459	0	GO:0055085	transmembrane transport
Glyma.02G224100	-3.95115	9.74e-09	AT5G59970.1|Symbols:|Histone superfamily protein|chr5:24146352-24146663 REVERSE LENGTH=103	7e-67	GO:0006334	nucleosome assembly
Glyma.02G228100	4.07763	1.43e-14	AT3G47340.1|Symbols:ASN1, DIN6, AT-ASN1|glutamine-dependent asparagine synthase 1|chr3:17438136-17441043 REVERSE LENGTH=584	0	GO:0006529 GO:0009063 GO:0009416 GO:0009646 GO:0009744 GO:0009749 GO:0009750 GO:0043617	asparagine biosynthetic process; cellular amino acid catabolic process; cellular response to sucrose starvation; response to absence of light; response to fructose stimulus; response to glucose stimulus; response to light stimulus; response to sucrose stimulus
Glyma.02G231000	-1.8401	0.00186407	AT2G30150.1|Symbols:|UDP-Glycosyltransferase superfamily protein|chr2:12874706-12876122 FORWARD LENGTH=440	1e-165	GO:0008152	metabolic process
Glyma.02G233300	1.78908	2.6e-08	AT2G40435.1|Symbols:|BEST Arabidopsis thaliana protein match is: transcription regulators (TAIR:AT3G56220.1); Has 289 Blast hits to 289 proteins in 30 species: Archae - 0; Bacteria - 0; Metazoa - 0; Fungi - 0; Plants - 289; Viruses - 0; Other Eukaryotes - 0 (source: NCBI BLink).|chr2:16887048-16888407 FORWARD LENGTH=158	8e-43	NA	NA
Glyma.02G238300	-1.14358	0.000785929	AT5G58270.1|Symbols:STA1, ATATM3, ATM3|ABC transporter of the mitochondrion 3|chr5:23562168-23567040 FORWARD LENGTH=728	0	GO:0006200 GO:0006777 GO:0006879 GO:0009555 GO:0009630 GO:0009658 GO:0010288 GO:0010380 GO:0040014 GO:0046686 GO:0048364 GO:0050790 GO:0051276 GO:0055085	ATP catabolic process; Mo-molybdopterin cofactor biosynthetic process; cellular iron ion homeostasis; chloroplast organization; chromosome organization; gravitropism; pollen development; regulation of catalytic activity; regulation of chlorophyll biosynthetic process; regulation of multicellular organism growth; response to cadmium ion; response to lead ion; root development; transmembrane transp…
Glyma.02G239000	-2.74235	8.35e-05	AT5G37010.1|Symbols:|unknown protein; FUNCTIONS IN: molecular_function unknown; INVOLVED IN: N-terminal protein myristoylation; EXPRESSED IN: 22 plant structures; EXPRESSED DURING: 13 growth stages; BEST Arabidopsis thaliana protein match is: unknown protein (TAIR:AT1G65710.1); Has 6746 Blast hits to 5259 proteins in 486 species: Archae - 7; Bacteria - 485; Metazoa - 3508; Fungi - 577; Plants - 3…	1e-58	GO:0000226 GO:0000911 GO:0006260 GO:0006275 GO:0006306 GO:0006342 GO:0006346 GO:0006499 GO:0008283 GO:0009909 GO:0009957 GO:0010389 GO:0016458 GO:0016572 GO:0031048 GO:0034968 GO:0051567	DNA methylation; DNA replication; N-terminal protein myristoylation; cell proliferation; chromatin silencing; chromatin silencing by small RNA; cytokinesis by cell plate formation; epidermal cell fate specification; gene silencing; histone H3-K9 methylation; histone lysine methylation; histone phosphorylation; methylation-dependent chromatin silencing; microtubule cytoskeleton organization; regul…
Glyma.02G239500	-1.28415	0.00518175	AT5G16370.1|Symbols:AAE5|acyl activating enzyme 5|chr5:5356823-5358481 REVERSE LENGTH=552	0	GO:0008152	metabolic process
Glyma.02G242800	1.37344	1.13e-06	AT1G66150.1|Symbols:TMK1|transmembrane kinase 1|chr1:24631503-24634415 FORWARD LENGTH=942	1e-164	GO:0006468 GO:0007165	protein phosphorylation; signal transduction
Glyma.02G244300	2.6649	6.15e-08	AT5G37670.1|Symbols:|HSP20-like chaperones superfamily protein|chr5:14969035-14969448 FORWARD LENGTH=137	5e-55	GO:0000302 GO:0006457 GO:0009408 GO:0009644 GO:0042542	protein folding; response to heat; response to high light intensity; response to hydrogen peroxide; response to reactive oxygen species
Glyma.02G245000	-2.97892	2.1e-09	AT1G14900.1|Symbols:HMGA|high mobility group A|chr1:5138665-5139353 REVERSE LENGTH=204	3e-36	GO:0001708 GO:0006334 GO:0006355 GO:0008283	cell fate specification; cell proliferation; nucleosome assembly; regulation of transcription, DNA-dependent
Glyma.02G245100	-2.93492	4.91e-11	AT1G14900.1|Symbols:HMGA|high mobility group A|chr1:5138665-5139353 REVERSE LENGTH=204	7e-37	GO:0001708 GO:0006334 GO:0006355 GO:0008283	cell fate specification; cell proliferation; nucleosome assembly; regulation of transcription, DNA-dependent
Glyma.02G245600	1.62675	0.00761782	AT1G74670.1|Symbols:|Gibberellin-regulated family protein|chr1:28053378-28053893 FORWARD LENGTH=101	7e-34	GO:0009739 GO:0009740 GO:0009744 GO:0009749 GO:0009750 GO:0010162 GO:0080167	gibberellic acid mediated signaling pathway; response to fructose stimulus; response to gibberellin stimulus; response to glucose stimulus; response to karrikin; response to sucrose stimulus; seed dormancy process
Glyma.02G247700	-1.50269	0.000317764	AT2G39670.1|Symbols:|Radical SAM superfamily protein|chr2:16534303-16536986 FORWARD LENGTH=428	0	GO:0006364 GO:0006399 GO:0009658 GO:0045036	chloroplast organization; protein targeting to chloroplast; rRNA processing; tRNA metabolic process
Glyma.02G252600	-3.27872	9.55e-08	AT5G05940.1|Symbols:ATROPGEF5, ROPGEF5|ROP guanine nucleotide exchange factor 5|chr5:1786028-1788363 FORWARD LENGTH=611	0	GO:0010089 GO:0044036	cell wall macromolecule metabolic process; xylem development
Glyma.02G253600	0.844547	0.00324774	AT3G11320.1|Symbols:|Nucleotide-sugar transporter family protein|chr3:3547017-3548539 REVERSE LENGTH=308	0	GO:0006863 GO:0016132	brassinosteroid biosynthetic process; purine nucleobase transport
Glyma.02G253900	1.73764	0.00513432	AT2G39920.3|Symbols:|HAD superfamily, subfamily IIIB acid phosphatase|chr2:16663201-16664305 REVERSE LENGTH=283	3e-62	GO:0046686	response to cadmium ion
Glyma.02G254200	1.68379	0.000312193	AT2G38090.1|Symbols:|Duplicated homeodomain-like superfamily protein|chr2:15945278-15946775 FORWARD LENGTH=298	8e-91	GO:0006355	regulation of transcription, DNA-dependent
Glyma.02G255800	1.56347	0.00402249	AT2G38120.1|Symbols:AUX1, WAV5, PIR1, MAP1|Transmembrane amino acid transporter family protein|chr2:15973493-15976792 FORWARD LENGTH=485	0	GO:0000271 GO:0001736 GO:0006865 GO:0006949 GO:0007155 GO:0007389 GO:0008361 GO:0009624 GO:0009723 GO:0009733 GO:0009825 GO:0009926 GO:0009932 GO:0009958 GO:0010015 GO:0010090 GO:0010218 GO:0010311 GO:0010817 GO:0040007 GO:0043481 GO:0045010 GO:0048765 GO:0048767 GO:0048829 GO:0071555	actin nucleation; amino acid transport; anthocyanin accumulation in tissues in response to UV light; auxin polar transport; cell adhesion; cell tip growth; cell wall organization; establishment of planar polarity; growth; lateral root formation; multidimensional cell growth; pattern specification process; polysaccharide biosynthetic process; positive gravitropism; regulation of cell size; regulat…
Glyma.02G258100	-1.32286	0.00110556	AT5G05560.1|Symbols:EMB2771|E3 ubiquitin ligase, putative|chr5:1641452-1654685 FORWARD LENGTH=1678	0	GO:0006302 GO:0006312 GO:0006511 GO:0007062 GO:0007129 GO:0007131 GO:0007276 GO:0009553 GO:0009793 GO:0010252 GO:0032875 GO:0042023 GO:0042138 GO:0043161 GO:0043248 GO:0045132 GO:0048481 GO:0051302 GO:0051510 GO:0051788	DNA endoreduplication; auxin homeostasis; double-strand break repair; embryo development ending in seed dormancy; embryo sac development; gamete generation; meiotic DNA double-strand break formation; meiotic chromosome segregation; mitotic recombination; ovule development; proteasomal ubiquitin-dependent protein catabolic process; proteasome assembly; reciprocal meiotic recombination; regulation …
Glyma.02G259900	-6.0645	0.00114534	NA	NA	NA	NA
Glyma.02G260100	0.887079	0.00628671	AT3G56200.1|Symbols:|Transmembrane amino acid transporter family protein|chr3:20850087-20851779 FORWARD LENGTH=435	3e-176	GO:0006865	amino acid transport
Glyma.02G260800	-1.25535	0.00435126	AT4G14270.1|Symbols:|Protein containing PAM2 motif which mediates interaction with the PABC domain of polyadenyl binding proteins.|chr4:8218517-8219037 FORWARD LENGTH=143	2e-13	GO:0008150	biological process
Glyma.02G263600	-1.41984	0.000483362	AT2G31820.1|Symbols:|Ankyrin repeat family protein|chr2:13530350-13532562 FORWARD LENGTH=662	4e-13	NA	NA
Glyma.02G265700	1.13227	0.00238139	NA	NA	NA	NA
Glyma.02G265800	1.55314	0.00121417	NA	NA	NA	NA
Glyma.02G265900	-4.64417	1.18e-05	AT2G44310.1|Symbols:|Calcium-binding EF-hand family protein|chr2:18309285-18309713 FORWARD LENGTH=142	3e-36	GO:0008150	biological process
Glyma.02G266200	-2.01995	0.000158169	AT2G04530.1|Symbols:CPZ, TRZ2|Metallo-hydrolase/oxidoreductase superfamily protein|chr2:1576808-1578611 FORWARD LENGTH=354	0	GO:0006364 GO:0006399 GO:0008033 GO:0009658 GO:0016556 GO:0042780	chloroplast organization; mRNA modification; rRNA processing; tRNA 3'-end processing; tRNA metabolic process; tRNA processing
Glyma.02G266600	1.92714	0.000256519	AT2G42990.1|Symbols:|GDSL-like Lipase/Acylhydrolase superfamily protein|chr2:17879056-17880200 FORWARD LENGTH=350	1e-159	GO:0006629	lipid metabolic process
Glyma.02G267500	1.07472	0.00566702	AT1G04990.1|Symbols:|Zinc finger C-x8-C-x5-C-x3-H type family protein|chr1:1419368-1421454 REVERSE LENGTH=404	3e-112	GO:0007623 GO:0008150	biological process; circadian rhythm
Glyma.02G267900	2.51377	1.07e-07	AT1G05000.1|Symbols:|Phosphotyrosine protein phosphatases superfamily protein|chr1:1425660-1428393 FORWARD LENGTH=215	2e-100	GO:0007243 GO:0016311 GO:0043407	dephosphorylation; intracellular protein kinase cascade; negative regulation of MAP kinase activity
Glyma.02G277600	-2.70537	1.41e-07	AT2G26760.1|Symbols:CYCB1;4|Cyclin B1;4|chr2:11401551-11403205 FORWARD LENGTH=387	2e-140	GO:0000079 GO:0010440 GO:0051726	regulation of cell cycle; regulation of cyclin-dependent protein serine/threonine kinase activity; stomatal lineage progression
Glyma.02G277700	1.09469	0.00413044	AT1G08500.1|Symbols:ENODL18, AtENODL18|early nodulin-like protein 18|chr1:2689110-2689881 FORWARD LENGTH=228	2e-83	NA	NA
Glyma.02G279000	-1.07344	0.00138998	AT5G19370.1|Symbols:|rhodanese-like domain-containing protein / PPIC-type PPIASE domain-containing protein|chr5:6524247-6526629 REVERSE LENGTH=299	4e-101	NA	NA
Glyma.02G282400	-0.784469	0.00568241	AT3G10260.3|Symbols:|Reticulon family protein|chr3:3171413-3172568 REVERSE LENGTH=267	7e-107	GO:0006612 GO:0009963 GO:0010363	positive regulation of flavonoid biosynthetic process; protein targeting to membrane; regulation of plant-type hypersensitive response
Glyma.02G286600	-2.95558	0.000253766	AT5G41880.1|Symbols:POLA3, POLA4|DNA primases;DNA primases|chr5:16761071-16764074 FORWARD LENGTH=451	0	GO:0006260 GO:0006261 GO:0006269 GO:0006306 GO:0008283 GO:0051567	DNA-dependent DNA replication; DNA methylation; DNA replication; DNA replication, synthesis of RNA primer; cell proliferation; histone H3-K9 methylation
Glyma.02G287400	-2.97811	0.000819627	NA	NA	NA	NA
Glyma.02G287600	1.34124	0.00129127	AT3G58790.1|Symbols:GAUT15|galacturonosyltransferase 15|chr3:21742455-21745972 REVERSE LENGTH=540	0	GO:0016051	carbohydrate biosynthetic process
Glyma.02G291300	-1.10827	0.00181259	AT3G20410.1|Symbols:CPK9|calmodulin-domain protein kinase 9|chr3:7116388-7118824 FORWARD LENGTH=541	0	GO:0000165 GO:0006468 GO:0006499 GO:0006612 GO:0007154 GO:0007165 GO:0009409 GO:0009723 GO:0009738 GO:0009862 GO:0009867 GO:0010363 GO:0030968 GO:0031348 GO:0043069 GO:0050832	MAPK cascade; N-terminal protein myristoylation; abscisic acid mediated signaling pathway; cell communication; defense response to fungus; endoplasmic reticulum unfolded protein response; jasmonic acid mediated signaling pathway; negative regulation of defense response; negative regulation of programmed cell death; protein phosphorylation; protein targeting to membrane; regulation of plant-type h…
Glyma.02G291500	1.24114	0.0020623	AT5G54940.2|Symbols:|Translation initiation factor SUI1 family protein|chr5:22308420-22308758 REVERSE LENGTH=112	3e-60	GO:0006413	translational initiation
Glyma.02G292400	-2.59368	0.000731277	AT1G50732.1|Symbols:|unknown protein.|chr1:18802781-18803263 FORWARD LENGTH=118	6e-07	NA	NA
Glyma.02G295800	-1.02086	0.00173184	AT5G55280.1|Symbols:FTSZ1-1, ATFTSZ1-1, CPFTSZ|homolog of bacterial cytokinesis Z-ring protein FTSZ 1-1|chr5:22420740-22422527 REVERSE LENGTH=433	0	GO:0006184 GO:0007017 GO:0009220 GO:0009637 GO:0009658 GO:0009902 GO:0010020 GO:0043572 GO:0051258	GTP catabolic process; chloroplast fission; chloroplast organization; chloroplast relocation; microtubule-based process; plastid fission; protein polymerization; pyrimidine ribonucleotide biosynthetic process; response to blue light
Glyma.02G296300	1.84814	9e-06	AT4G26700.2|Symbols:ATFIM1, FIM1|fimbrin 1|chr4:13463760-13467426 FORWARD LENGTH=687	0	GO:0007623 GO:0030048 GO:0051645 GO:0051646 GO:0060151	Golgi localization; actin filament-based movement; circadian rhythm; mitochondrion localization; peroxisome localization
Glyma.02G296400	0.919909	0.00725481	AT1G66970.1|Symbols:SVL2|SHV3-like 2|chr1:24992746-24996005 REVERSE LENGTH=763	0	GO:0006071 GO:0006629 GO:0030643	cellular phosphate ion homeostasis; glycerol metabolic process; lipid metabolic process
Glyma.02G296800	-2.99128	3.94e-08	AT3G20150.1|Symbols:|Kinesin motor family protein|chr3:7031412-7036499 FORWARD LENGTH=1114	0	GO:0006260 GO:0006270 GO:0006275 GO:0006306 GO:0006342 GO:0006346 GO:0007018 GO:0008283 GO:0010089 GO:0016246 GO:0044036 GO:0051567 GO:0051726	DNA methylation; DNA replication; DNA replication initiation; RNA interference; cell proliferation; cell wall macromolecule metabolic process; chromatin silencing; histone H3-K9 methylation; methylation-dependent chromatin silencing; microtubule-based movement; regulation of DNA replication; regulation of cell cycle; xylem development
Glyma.02G296900	-0.922659	0.00123524	AT5G55530.2|Symbols:|Calcium-dependent lipid-binding (CaLB domain) family protein|chr5:22494439-22495656 FORWARD LENGTH=405	2e-146	GO:0008150	biological process
Glyma.02G297900	-1.16107	0.000744075	AT5G55580.1|Symbols:|Mitochondrial transcription termination factor family protein|chr5:22515601-22517408 FORWARD LENGTH=496	0	GO:0048364 GO:0048367	root development; shoot system development
Glyma.02G298900	-1.41125	0.00528002	AT3G06920.1|Symbols:|Tetratricopeptide repeat (TPR)-like superfamily protein|chr3:2181717-2184449 FORWARD LENGTH=871	0	GO:0008150	biological process
Glyma.02G299100	-2.62012	2.07e-06	AT3G13110.1|Symbols:ATSERAT2;2, SAT-1, SAT-A, SAT3, SAT-M, SERAT2;2|serine acetyltransferase 2;2|chr3:4214939-4216114 REVERSE LENGTH=391	1e-143	GO:0006535 GO:0006569 GO:0009684 GO:0019344 GO:0019761 GO:0046686	cysteine biosynthetic process; cysteine biosynthetic process from serine; glucosinolate biosynthetic process; indoleacetic acid biosynthetic process; response to cadmium ion; tryptophan catabolic process
Glyma.02G300200	-1.06156	0.00521289	AT4G14540.1|Symbols:NF-YB3|nuclear factor Y, subunit B3|chr4:8344663-8345148 FORWARD LENGTH=161	7e-73	GO:0006355	regulation of transcription, DNA-dependent
Glyma.02G301000	-0.886003	0.00200909	AT3G13180.1|Symbols:|NOL1/NOP2/sun family protein / antitermination NusB domain-containing protein|chr3:4236326-4239966 REVERSE LENGTH=523	0	GO:0006355 GO:0006364 GO:0006399 GO:0009658 GO:0045036	chloroplast organization; protein targeting to chloroplast; rRNA processing; regulation of transcription, DNA-dependent; tRNA metabolic process
Glyma.02G302800	-1.94512	4.34e-06	AT3G44730.1|Symbols:ATKP1, KP1|kinesin-like protein 1|chr3:16285888-16290852 FORWARD LENGTH=1087	0	GO:0007018 GO:0009060	aerobic respiration; microtubule-based movement
Glyma.02G305500	1.45801	0.00280884	NA	NA	NA	NA
Glyma.02G308700	1.10692	9.25e-05	AT4G12730.1|Symbols:FLA2|FASCICLIN-like arabinogalactan 2|chr4:7491598-7492809 REVERSE LENGTH=403	2e-150	GO:0006084 GO:0006816 GO:0007030 GO:0009651 GO:0010583 GO:0016126 GO:0016132 GO:0048767	Golgi organization; acetyl-CoA metabolic process; brassinosteroid biosynthetic process; calcium ion transport; response to cyclopentenone; response to salt stress; root hair elongation; sterol biosynthetic process
Glyma.02G309100	-2.93348	0.000418164	AT1G57820.1|Symbols:VIM1, ORTH2|Zinc finger (C3HC4-type RING finger) family protein|chr1:21414342-21417902 REVERSE LENGTH=645	0	GO:0000278 GO:0000280 GO:0000724 GO:0000911 GO:0006260 GO:0006261 GO:0006270 GO:0006275 GO:0006306 GO:0006325 GO:0006342 GO:0006355 GO:0007000 GO:0008283 GO:0009555 GO:0010424 GO:0016444 GO:0016567 GO:0016568 GO:0016572 GO:0031047 GO:0031508 GO:0032776 GO:0051301 GO:0051567 GO:0051726 GO:0090309	DNA-dependent DNA replication; DNA methylation; DNA methylation on cytosine; DNA methylation on cytosine within a CG sequence; DNA replication; DNA replication initiation; cell division; cell proliferation; centromeric heterochromatin assembly; chromatin modification; chromatin organization; chromatin silencing; cytokinesis by cell plate formation; double-strand break repair via homologous recomb…
Glyma.02G311900	1.2572	1.57e-05	AT4G35320.1|Symbols:|unknown protein; BEST Arabidopsis thaliana protein match is: unknown protein (TAIR:AT2G17300.1); Has 30201 Blast hits to 17322 proteins in 780 species: Archae - 12; Bacteria - 1396; Metazoa - 17338; Fungi - 3422; Plants - 5037; Viruses - 0; Other Eukaryotes - 2996 (source: NCBI BLink).|chr4:16806139-16806582 REVERSE LENGTH=147	1e-30	GO:0008150 GO:0042546	biological process; cell wall biogenesis
Glyma.03G002600	-1.43686	0.0023648	AT4G01037.1|Symbols:WTF1, AtWTF1|Ubiquitin carboxyl-terminal hydrolase family protein|chr4:451444-453030 REVERSE LENGTH=528	0	NA	NA
Glyma.03G006700	-1.77943	0.00408614	AT3G03630.1|Symbols:CS26|cysteine synthase 26|chr3:878388-880400 REVERSE LENGTH=404	8e-169	GO:0009643 GO:0010310 GO:0015979 GO:0019344 GO:0090322	cysteine biosynthetic process; photosynthesis; photosynthetic acclimation; regulation of hydrogen peroxide metabolic process; regulation of superoxide metabolic process
Glyma.03G008300	-1.29174	0.00383123	AT4G00400.1|Symbols:GPAT8, AtGPAT8|glycerol-3-phosphate acyltransferase 8|chr4:174312-176734 REVERSE LENGTH=500	0	GO:0006655 GO:0008152 GO:0010075 GO:0010143	cutin biosynthetic process; metabolic process; phosphatidylglycerol biosynthetic process; regulation of meristem growth
Glyma.03G012000	1.53551	0.00347826	NA	NA	NA	NA
Glyma.03G013400	0.805707	0.00498176	AT3G61260.1|Symbols:|Remorin family protein|chr3:22675403-22676701 REVERSE LENGTH=212	2e-61	GO:0008150	biological process
Glyma.03G015700	-0.950932	0.000273001	AT2G31890.1|Symbols:ATRAP, RAP|RAP|chr2:13557100-13559715 REVERSE LENGTH=671	0	GO:0008150	biological process
Glyma.03G017100	-2.25732	0.000139238	AT2G45720.2|Symbols:|ARM repeat superfamily protein|chr2:18834468-18836129 FORWARD LENGTH=553	0	GO:0008150 GO:0010413 GO:0045492	biological process; glucuronoxylan metabolic process; xylan biosynthetic process
Glyma.03G017500	2.32626	0.00895759	AT4G10160.1|Symbols:|RING/U-box superfamily protein|chr4:6336023-6337301 FORWARD LENGTH=225	4e-19	GO:0016567	protein ubiquitination
Glyma.03G017800	0.916518	0.000192302	AT4G00770.1|Symbols:|unknown protein; Has 127 Blast hits to 120 proteins in 33 species: Archae - 0; Bacteria - 2; Metazoa - 6; Fungi - 8; Plants - 62; Viruses - 3; Other Eukaryotes - 46 (source: NCBI BLink).|chr4:331195-333050 FORWARD LENGTH=440	3e-41	GO:0008150	biological process
Glyma.03G018800	-1.32736	0.00163122	AT2G45680.1|Symbols:|TCP family transcription factor|chr2:18820717-18821787 REVERSE LENGTH=356	2e-88	GO:0006355 GO:0008361 GO:0048364 GO:1900056	negative regulation of leaf senescence; regulation of cell size; regulation of transcription, DNA-dependent; root development
Glyma.03G021700	-3.62191	3.01e-07	AT2G45490.1|Symbols:AtAUR3, AUR3|ataurora3|chr2:18747658-18749044 REVERSE LENGTH=288	3e-166	GO:0000226 GO:0000278 GO:0000911 GO:0006342 GO:0006468 GO:0009640 GO:0010388 GO:0016567 GO:0016571 GO:0016572 GO:0016579 GO:0043987 GO:0043988 GO:0045893 GO:0051567	chromatin silencing; cullin deneddylation; cytokinesis by cell plate formation; histone H3-K9 methylation; histone H3-S10 phosphorylation; histone H3-S28 phosphorylation; histone methylation; histone phosphorylation; microtubule cytoskeleton organization; mitotic cell cycle; photomorphogenesis; positive regulation of transcription, DNA-dependent; protein deubiquitination; protein phosphorylation;…
Glyma.03G022000	-2.16594	0.00219844	AT4G32430.1|Symbols:|Pentatricopeptide repeat (PPR) superfamily protein|chr4:15652982-15655273 FORWARD LENGTH=763	0	GO:0008150	biological process
Glyma.03G026700	-1.1624	0.000999667	AT2G45350.1|Symbols:CRR4|Pentatricopeptide repeat (PPR) superfamily protein|chr2:18694816-18696657 REVERSE LENGTH=613	0	GO:0016556	mRNA modification
Glyma.03G030600	1.33195	0.0096512	AT4G31500.1|Symbols:CYP83B1, SUR2, RNT1, RED1, ATR4|cytochrome P450, family 83, subfamily B, polypeptide 1|chr4:15273677-15275271 REVERSE LENGTH=499	1e-159	GO:0000096 GO:0000162 GO:0006520 GO:0006546 GO:0006569 GO:0006636 GO:0006733 GO:0006766 GO:0008652 GO:0009072 GO:0009106 GO:0009108 GO:0009117 GO:0009641 GO:0009682 GO:0009684 GO:0009695 GO:0009759 GO:0010114 GO:0019288 GO:0019748 GO:0019761 GO:0042742 GO:0044272 GO:0048830 GO:0052544 GO:0055114	adventitious root development; aromatic amino acid family metabolic process; cellular amino acid biosynthetic process; cellular amino acid metabolic process; coenzyme biosynthetic process; defense response by callose deposition in cell wall; defense response to bacterium; glucosinolate biosynthetic process; glycine catabolic process; indole glucosinolate biosynthetic process; indoleacetic acid bi…
Glyma.03G033200	-0.928925	0.00395857	AT1G12244.1|Symbols:|Polynucleotidyl transferase, ribonuclease H-like superfamily protein|chr1:4157719-4158893 FORWARD LENGTH=254	8e-82	GO:0006139 GO:0006281 GO:0006310 GO:0006974	DNA recombination; DNA repair; nucleobase-containing compound metabolic process; response to DNA damage stimulus
Glyma.03G035400	-1.12492	0.000549623	AT3G42630.1|Symbols:|Pentatricopeptide repeat (PPR) superfamily protein|chr3:14722314-14723635 FORWARD LENGTH=415	8e-153	NA	NA
Glyma.03G035500	-2.20974	5.77e-05	AT2G04865.1|Symbols:|Aminotransferase-like, plant mobile domain family protein|chr2:1712149-1714599 FORWARD LENGTH=667	2e-23	GO:0008150	biological process
Glyma.03G035600	-4.53475	0.00265083	AT3G08770.1|Symbols:LTP6|lipid transfer protein 6|chr3:2664349-2664784 REVERSE LENGTH=113	2e-25	GO:0006869 GO:0009414	lipid transport; response to water deprivation
Glyma.03G036600	-1.25379	0.00856121	AT5G01840.1|Symbols:ATOFP1, OFP1|ovate family protein 1|chr5:324552-325364 FORWARD LENGTH=270	2e-37	GO:0006499 GO:0045892 GO:0048513 GO:0051510	N-terminal protein myristoylation; negative regulation of transcription, DNA-dependent; organ development; regulation of unidimensional cell growth
Glyma.03G040100	-3.80697	4.34e-09	AT2G38540.1|Symbols:LP1, LTP1, ATLTP1|lipid transfer protein 1|chr2:16130418-16130893 FORWARD LENGTH=118	9e-32	GO:0006869	lipid transport
Glyma.03G040400	-4.67135	1.88e-06	AT2G38540.1|Symbols:LP1, LTP1, ATLTP1|lipid transfer protein 1|chr2:16130418-16130893 FORWARD LENGTH=118	2e-33	GO:0006869	lipid transport
Glyma.03G043300	1.51521	0.00276881	AT5G01710.1|Symbols:|methyltransferases|chr5:263709-265250 REVERSE LENGTH=513	1e-53	GO:0006944 GO:0008152 GO:0048193	Golgi vesicle transport; cellular membrane fusion; metabolic process
Glyma.03G045400	1.00965	0.00931002	AT5G01710.1|Symbols:|methyltransferases|chr5:263709-265250 REVERSE LENGTH=513	0	GO:0006944 GO:0008152 GO:0048193	Golgi vesicle transport; cellular membrane fusion; metabolic process
Glyma.03G046200	0.984167	0.00772956	AT3G51660.1|Symbols:|Tautomerase/MIF superfamily protein|chr3:19164229-19165076 REVERSE LENGTH=112	8e-45	GO:0006569 GO:0006954 GO:0009684 GO:0051707	indoleacetic acid biosynthetic process; inflammatory response; response to other organism; tryptophan catabolic process
Glyma.03G047100	-1.78445	0.003249	AT3G51740.1|Symbols:IMK2|inflorescence meristem receptor-like kinase 2|chr3:19189248-19191842 FORWARD LENGTH=836	0	GO:0006468 GO:0007169 GO:0008283	cell proliferation; protein phosphorylation; transmembrane receptor protein tyrosine kinase signaling pathway
Glyma.03G050000	1.35678	0.00138172	AT3G08890.2|Symbols:|Protein of unknown function, DUF538|chr3:2706701-2707775 FORWARD LENGTH=170	8e-97	GO:0008150	biological process
Glyma.03G050400	-1.28947	0.000413887	AT5G01590.1|Symbols:|unknown protein; FUNCTIONS IN: molecular_function unknown; INVOLVED IN: biological_process unknown; LOCATED IN: chloroplast, chloroplast envelope; EXPRESSED IN: 22 plant structures; EXPRESSED DURING: 13 growth stages; Has 60 Blast hits to 59 proteins in 31 species: Archae - 0; Bacteria - 20; Metazoa - 1; Fungi - 2; Plants - 33; Viruses - 0; Other Eukaryotes - 4 (source: NCBI …	0	GO:0000272 GO:0005982 GO:0009664 GO:0010075 GO:0045037	plant-type cell wall organization; polysaccharide catabolic process; protein import into chloroplast stroma; regulation of meristem growth; starch metabolic process
Glyma.03G058300	1.62807	0.000396623	AT3G51860.1|Symbols:CAX3, ATHCX1, CAX1-LIKE, ATCAX3|cation exchanger 3|chr3:19239458-19242519 FORWARD LENGTH=459	0	GO:0006793 GO:0006812 GO:0006814 GO:0006816 GO:0006874 GO:0006882 GO:0009624 GO:0010351 GO:0030026 GO:0051592 GO:0055062 GO:0055085	calcium ion transport; cation transport; cellular calcium ion homeostasis; cellular manganese ion homeostasis; cellular zinc ion homeostasis; lithium ion transport; phosphate ion homeostasis; phosphorus metabolic process; response to calcium ion; response to nematode; sodium ion transport; transmembrane transport
Glyma.03G061300	6.67334	0.000413505	NA	NA	NA	NA
Glyma.03G063200	-0.835513	0.00957598	AT2G38140.1|Symbols:PSRP4|plastid-specific ribosomal protein 4|chr2:15980948-15981459 FORWARD LENGTH=118	3e-29	GO:0006412 GO:0032544	plastid translation; translation
Glyma.03G063900	1.51508	0.000320395	AT2G38120.1|Symbols:AUX1, WAV5, PIR1, MAP1|Transmembrane amino acid transporter family protein|chr2:15973493-15976792 FORWARD LENGTH=485	0	GO:0000271 GO:0001736 GO:0006865 GO:0006949 GO:0007155 GO:0007389 GO:0008361 GO:0009624 GO:0009723 GO:0009733 GO:0009825 GO:0009926 GO:0009932 GO:0009958 GO:0010015 GO:0010090 GO:0010218 GO:0010311 GO:0010817 GO:0040007 GO:0043481 GO:0045010 GO:0048765 GO:0048767 GO:0048829 GO:0071555	actin nucleation; amino acid transport; anthocyanin accumulation in tissues in response to UV light; auxin polar transport; cell adhesion; cell tip growth; cell wall organization; establishment of planar polarity; growth; lateral root formation; multidimensional cell growth; pattern specification process; polysaccharide biosynthetic process; positive gravitropism; regulation of cell size; regulat…
Glyma.03G066800	1.53429	0.000626671	AT5G01670.1|Symbols:|NAD(P)-linked oxidoreductase superfamily protein|chr5:252000-253856 FORWARD LENGTH=322	2e-90	GO:0010048 GO:0048573 GO:0055114	oxidation-reduction process; photoperiodism, flowering; vernalization response
Glyma.03G067400	2.30841	0.00684656	AT3G14200.1|Symbols:|Chaperone DnaJ-domain superfamily protein|chr3:4712881-4714361 REVERSE LENGTH=230	4e-07	GO:0006457	protein folding
Glyma.03G074400	-0.913677	0.00645	AT5G23860.2|Symbols:TUB8|tubulin beta 8|chr5:8042962-8044528 FORWARD LENGTH=449	0	GO:0006094 GO:0006184 GO:0007010 GO:0007017 GO:0007018 GO:0009409 GO:0009651 GO:0010498 GO:0010583 GO:0051258	GTP catabolic process; cytoskeleton organization; gluconeogenesis; microtubule-based movement; microtubule-based process; proteasomal protein catabolic process; protein polymerization; response to cold; response to cyclopentenone; response to salt stress
Glyma.03G074800	-2.33775	5.78e-07	AT3G54090.1|Symbols:FLN1|fructokinase-like 1|chr3:20028145-20029835 FORWARD LENGTH=471	0	GO:0006364 GO:0006399 GO:0009658 GO:0009793 GO:0010027 GO:0010228 GO:0016226 GO:0042793 GO:0045893 GO:0048481	chloroplast organization; embryo development ending in seed dormancy; iron-sulfur cluster assembly; ovule development; positive regulation of transcription, DNA-dependent; rRNA processing; tRNA metabolic process; thylakoid membrane organization; transcription from plastid promoter; vegetative to reproductive phase transition of meristem
Glyma.03G078000	1.8184	9.83e-06	AT2G38090.1|Symbols:|Duplicated homeodomain-like superfamily protein|chr2:15945278-15946775 FORWARD LENGTH=298	3e-120	GO:0006355	regulation of transcription, DNA-dependent
Glyma.03G078600	0.992457	0.00974464	AT2G38110.1|Symbols:ATGPAT6, GPAT6|glycerol-3-phosphate acyltransferase 6|chr2:15952816-15955364 REVERSE LENGTH=501	0	GO:0006655 GO:0008152 GO:0009908 GO:0010143	cutin biosynthetic process; flower development; metabolic process; phosphatidylglycerol biosynthetic process
Glyma.03G080200	-0.858389	0.0010052	AT4G13200.1|Symbols:|unknown protein; FUNCTIONS IN: molecular_function unknown; INVOLVED IN: biological_process unknown; LOCATED IN: thylakoid, chloroplast thylakoid membrane, chloroplast, plastoglobule; EXPRESSED IN: 22 plant structures; EXPRESSED DURING: 13 growth stages; Has 97 Blast hits to 97 proteins in 46 species: Archae - 0; Bacteria - 65; Metazoa - 2; Fungi - 0; Plants - 28; Viruses - 0;…	2e-35	GO:0008150	biological process
Glyma.03G082100	1.11655	0.000195871	AT3G09390.1|Symbols:MT2A, ATMT-K, ATMT-1|metallothionein 2A|chr3:2889737-2890188 REVERSE LENGTH=81	1e-09	GO:0006878	cellular copper ion homeostasis
Glyma.03G082900	-2.91574	3.72e-08	AT5G02440.1|Symbols:|unknown protein; Has 71 Blast hits to 71 proteins in 12 species: Archae - 0; Bacteria - 0; Metazoa - 0; Fungi - 0; Plants - 71; Viruses - 0; Other Eukaryotes - 0 (source: NCBI BLink).|chr5:531066-532725 FORWARD LENGTH=176	6e-28	GO:0008150	biological process
Glyma.03G086200	-1.10334	0.00416739	AT3G25230.1|Symbols:ROF1, ATFKBP62, FKBP62|rotamase FKBP 1|chr3:9188257-9191137 FORWARD LENGTH=551	0	GO:0000413 GO:0006457 GO:0006499 GO:0006970 GO:0009408 GO:0009611 GO:0009644 GO:0009845 GO:0018208 GO:0034976 GO:0042542 GO:0046686 GO:0070370	N-terminal protein myristoylation; cellular heat acclimation; peptidyl-proline modification; protein folding; protein peptidyl-prolyl isomerization; response to cadmium ion; response to endoplasmic reticulum stress; response to heat; response to high light intensity; response to hydrogen peroxide; response to osmotic stress; response to wounding; seed germination
Glyma.03G086800	1.23711	0.00205143	AT3G07340.1|Symbols:|basic helix-loop-helix (bHLH) DNA-binding superfamily protein|chr3:2341188-2343288 REVERSE LENGTH=456	2e-108	GO:0006355	regulation of transcription, DNA-dependent
Glyma.03G089700	-1.03661	0.00308503	AT5G48470.1|Symbols:|unknown protein; FUNCTIONS IN: molecular_function unknown; INVOLVED IN: biological_process unknown; LOCATED IN: chloroplast; EXPRESSED IN: 22 plant structures; EXPRESSED DURING: 13 growth stages; Has 30201 Blast hits to 17322 proteins in 780 species: Archae - 12; Bacteria - 1396; Metazoa - 17338; Fungi - 3422; Plants - 5037; Viruses - 0; Other Eukaryotes - 2996 (source: NCBI …	0	GO:0008150	biological process
Glyma.03G094800	1.23163	0.00117048	AT5G41761.1|Symbols:|unknown protein; FUNCTIONS IN: molecular_function unknown; INVOLVED IN: biological_process unknown; LOCATED IN: cellular_component unknown; BEST Arabidopsis thaliana protein match is: unknown protein (TAIR:AT3G55570.1); Has 30201 Blast hits to 17322 proteins in 780 species: Archae - 12; Bacteria - 1396; Metazoa - 17338; Fungi - 3422; Plants - 5037; Viruses - 0; Other Eukaryot…	8e-24	GO:0008150	biological process
Glyma.03G101800	-7.98887	9.34e-15	AT1G02205.3|Symbols:CER1|Fatty acid hydroxylase superfamily|chr1:418818-422154 FORWARD LENGTH=630	0	GO:0009414 GO:0010025 GO:0042335 GO:0042742 GO:0043447 GO:0046185 GO:0050832	aldehyde catabolic process; alkane biosynthetic process; cuticle development; defense response to bacterium; defense response to fungus; response to water deprivation; wax biosynthetic process
Glyma.03G102700	0.880086	0.00103397	AT5G26667.3|Symbols:PYR6|P-loop containing nucleoside triphosphate hydrolases superfamily protein|chr5:9276659-9278091 FORWARD LENGTH=202	1e-121	GO:0006139 GO:0009173 GO:0046939	nucleobase-containing compound metabolic process; nucleotide phosphorylation; pyrimidine ribonucleoside monophosphate metabolic process
Glyma.03G103500	-1.55445	0.000337937	AT2G44640.1|Symbols:|FUNCTIONS IN: molecular_function unknown; INVOLVED IN: biological_process unknown; LOCATED IN: mitochondrion, chloroplast, plasma membrane, plastid, chloroplast envelope; EXPRESSED IN: 23 plant structures; EXPRESSED DURING: 13 growth stages; CONTAINS InterPro DOMAIN/s: Protein of unknown function DUF3769 (InterPro:IPR022244); BEST Arabidopsis thaliana protein match is: pigmen…	2e-166	GO:0008150	biological process
Glyma.03G103600	-1.2454	0.000981679	AT3G60210.1|Symbols:|GroES-like family protein|chr3:22251443-22252709 REVERSE LENGTH=138	9e-59	GO:0006457	protein folding
Glyma.03G104000	-2.19959	3.6e-05	AT1G02180.1|Symbols:|ferredoxin-related|chr1:413619-414505 REVERSE LENGTH=226	2e-84	GO:0008150	biological process
Glyma.03G105400	1.00197	0.000427011	AT2G44670.1|Symbols:|Protein of unknown function (DUF581)|chr2:18425279-18425673 FORWARD LENGTH=93	5e-30	GO:0008150	biological process
Glyma.03G105700	2.94705	3.11e-07	AT4G37850.1|Symbols:|basic helix-loop-helix (bHLH) DNA-binding superfamily protein|chr4:17796362-17797647 REVERSE LENGTH=328	1e-39	GO:0006355	regulation of transcription, DNA-dependent
Glyma.03G107800	1.84167	5.4e-05	AT2G44740.1|Symbols:CYCP4;1|cyclin p4;1|chr2:18442287-18443304 REVERSE LENGTH=202	1e-99	GO:0010440 GO:0051726	regulation of cell cycle; stomatal lineage progression
Glyma.03G108300	-1.90934	0.00366435	AT1G71460.1|Symbols:|Pentatricopeptide repeat (PPR-like) superfamily protein|chr1:26928247-26930316 REVERSE LENGTH=689	3e-137	GO:0008150	biological process
Glyma.03G109000	-0.922061	0.00232907	AT3G13490.1|Symbols:OVA5, ATKRS-2|Lysyl-tRNA synthetase, class II|chr3:4395984-4399302 REVERSE LENGTH=602	0	GO:0006364 GO:0006399 GO:0006418 GO:0006430 GO:0009658 GO:0009793 GO:0010027 GO:0010228 GO:0016226 GO:0048481	chloroplast organization; embryo development ending in seed dormancy; iron-sulfur cluster assembly; lysyl-tRNA aminoacylation; ovule development; rRNA processing; tRNA aminoacylation for protein translation; tRNA metabolic process; thylakoid membrane organization; vegetative to reproductive phase transition of meristem
Glyma.03G109300	-2.42468	6.49e-05	AT4G16970.1|Symbols:|Protein kinase superfamily protein|chr4:9551516-9555766 REVERSE LENGTH=889	5e-178	GO:0006468 GO:0045727 GO:0046777	positive regulation of translation; protein autophosphorylation; protein phosphorylation
Glyma.03G114300	-1.64516	0.00433024	AT3G60390.1|Symbols:HAT3|homeobox-leucine zipper protein 3|chr3:22320788-22322370 REVERSE LENGTH=315	3e-99	GO:0006351 GO:0006355	regulation of transcription, DNA-dependent; transcription, DNA-dependent
Glyma.03G117500	-1.23182	0.00224645	AT1G02065.1|Symbols:SPL8|squamosa promoter binding protein-like 8|chr1:365625-367149 FORWARD LENGTH=333	3e-82	GO:0009554 GO:0009556 GO:0048653	anther development; megasporogenesis; microsporogenesis
Glyma.03G121300	3.82143	0.00161091	AT1G78950.1|Symbols:|Terpenoid cyclases family protein|chr1:29684558-29688673 REVERSE LENGTH=759	0	GO:0016126 GO:0019745	pentacyclic triterpenoid biosynthetic process; sterol biosynthetic process
Glyma.03G122200	1.47323	2.76e-05	AT5G07050.1|Symbols:|nodulin MtN21 /EamA-like transporter family protein|chr5:2191533-2193416 REVERSE LENGTH=402	2e-174	NA	NA
Glyma.03G122500	1.88853	4.3e-05	AT1G68570.1|Symbols:|Major facilitator superfamily protein|chr1:25746811-25750110 FORWARD LENGTH=596	0	GO:0006857	oligopeptide transport
Glyma.03G123600	-2.23771	1.98e-05	AT5G06150.1|Symbols:CYC1BAT, CYCB1;2|Cyclin family protein|chr5:1859542-1861570 REVERSE LENGTH=445	8e-167	GO:0000079 GO:0009651 GO:0010332 GO:0051726	regulation of cell cycle; regulation of cyclin-dependent protein serine/threonine kinase activity; response to gamma radiation; response to salt stress
Glyma.03G125000	2.37438	3.72e-05	AT4G39250.1|Symbols:ATRL1, RSM2, RL1|RAD-like 1|chr4:18271457-18271857 REVERSE LENGTH=100	1e-37	GO:0006355	regulation of transcription, DNA-dependent
Glyma.03G130900	-1.7102	0.00110019	AT5G04040.1|Symbols:SDP1|Patatin-like phospholipase family protein|chr5:1090346-1093003 FORWARD LENGTH=825	0	GO:0006629 GO:0006635 GO:0008152 GO:0016558 GO:0019433 GO:0044265	cellular macromolecule catabolic process; fatty acid beta-oxidation; lipid metabolic process; metabolic process; protein import into peroxisome matrix; triglyceride catabolic process
Glyma.03G131100	-1.07687	0.0024335	AT4G33030.1|Symbols:SQD1|sulfoquinovosyldiacylglycerol 1|chr4:15936051-15937566 FORWARD LENGTH=477	0	GO:0009247 GO:0016036 GO:0019375 GO:0044237 GO:0046506	cellular metabolic process; cellular response to phosphate starvation; galactolipid biosynthetic process; glycolipid biosynthetic process; sulfolipid biosynthetic process
Glyma.03G134900	-2.33571	0.00133132	AT3G10310.1|Symbols:|P-loop nucleoside triphosphate hydrolases superfamily protein with CH (Calponin Homology) domain|chr3:3190208-3195005 FORWARD LENGTH=922	0	GO:0000226 GO:0000911 GO:0006342 GO:0007018 GO:0051567	chromatin silencing; cytokinesis by cell plate formation; histone H3-K9 methylation; microtubule-based movement; microtubule cytoskeleton organization
Glyma.03G138900	-2.85668	0.000431626	AT3G57600.1|Symbols:|Integrase-type DNA-binding superfamily protein|chr3:21332841-21333674 FORWARD LENGTH=277	1e-87	GO:0006355 GO:0010093 GO:0048440 GO:0048507	carpel development; meristem development; regulation of transcription, DNA-dependent; specification of floral organ identity
Glyma.03G139500	-1.42056	4.74e-06	AT3G52110.2|Symbols:|unknown protein; FUNCTIONS IN: molecular_function unknown; INVOLVED IN: biological_process unknown; LOCATED IN: cellular_component unknown; EXPRESSED IN: 20 plant structures; EXPRESSED DURING: 11 growth stages.|chr3:19323925-19325632 REVERSE LENGTH=334	9e-30	GO:0000226 GO:0000911 GO:0008150	biological process; cytokinesis by cell plate formation; microtubule cytoskeleton organization
Glyma.03G140700	-1.93104	2.05e-06	AT5G06940.1|Symbols:|Leucine-rich repeat receptor-like protein kinase family protein|chr5:2148078-2150771 REVERSE LENGTH=872	0	GO:0006468	protein phosphorylation
Glyma.03G141500	2.9988	1.33e-05	AT3G12180.1|Symbols:|Cornichon family protein|chr3:3883464-3884570 FORWARD LENGTH=146	1e-38	GO:0006891 GO:0006944 GO:0035556	cellular membrane fusion; intra-Golgi vesicle-mediated transport; intracellular signal transduction
Glyma.03G141600	1.08385	0.00224645	AT3G57830.1|Symbols:|Leucine-rich repeat protein kinase family protein|chr3:21419778-21422320 FORWARD LENGTH=662	0	GO:0006468 GO:0007169	protein phosphorylation; transmembrane receptor protein tyrosine kinase signaling pathway
Glyma.03G141700	1.31882	1.08e-05	AT2G42280.1|Symbols:|basic helix-loop-helix (bHLH) DNA-binding superfamily protein|chr2:17611428-17613163 REVERSE LENGTH=359	1e-76	GO:0006355 GO:0046685 GO:0048573	photoperiodism, flowering; regulation of transcription, DNA-dependent; response to arsenic-containing substance
Glyma.03G141800	-3.97638	2.96e-07	AT2G42260.1|Symbols:UVI4, PYM|uv-b-insensitive 4|chr2:17602240-17603283 REVERSE LENGTH=259	4e-44	GO:0010091 GO:0010224 GO:0042023	DNA endoreduplication; response to UV-B; trichome branching
Glyma.03G144800	0.862022	0.00582845	AT5G09810.1|Symbols:ACT7|actin 7|chr5:3052809-3054220 FORWARD LENGTH=377	0	GO:0006007 GO:0006094 GO:0007010 GO:0009416 GO:0009611 GO:0009733 GO:0009845 GO:0010053 GO:0010498 GO:0032880 GO:0048364 GO:0048767 GO:0051301	cell division; cytoskeleton organization; gluconeogenesis; glucose catabolic process; proteasomal protein catabolic process; regulation of protein localization; response to auxin stimulus; response to light stimulus; response to wounding; root development; root epidermal cell differentiation; root hair elongation; seed germination
Glyma.03G146600	-1.18703	0.00646333	AT2G41950.1|Symbols:|unknown protein; FUNCTIONS IN: molecular_function unknown; INVOLVED IN: biological_process unknown; LOCATED IN: chloroplast, plant-type cell wall; EXPRESSED IN: 22 plant structures; EXPRESSED DURING: 13 growth stages; Has 53 Blast hits to 53 proteins in 24 species: Archae - 0; Bacteria - 27; Metazoa - 0; Fungi - 0; Plants - 26; Viruses - 0; Other Eukaryotes - 0 (source: NCBI …	9e-79	GO:0008150	biological process
Glyma.03G148100	-3.56853	8.02e-09	AT1G08880.1|Symbols:HTA5, H2AXA, G-H2AX, GAMMA-H2AX|Histone superfamily protein|chr1:2847144-2847676 REVERSE LENGTH=142	1e-81	GO:0006334	nucleosome assembly
Glyma.03G149200	1.674	4.17e-07	AT2G48020.1|Symbols:|Major facilitator superfamily protein|chr2:19644441-19647007 FORWARD LENGTH=463	0	GO:0006810 GO:0055085	transmembrane transport; transport
Glyma.03G149900	1.1948	0.000253764	AT4G02940.1|Symbols:|oxidoreductase, 2OG-Fe(II) oxygenase family protein|chr4:1306658-1310699 FORWARD LENGTH=569	0	GO:0055114 GO:0080167	oxidation-reduction process; response to karrikin
Glyma.03G152300	-1.64516	3.68e-05	AT2G27310.1|Symbols:|F-box family protein|chr2:11683954-11684967 REVERSE LENGTH=337	2e-38	GO:0002679 GO:0008150 GO:0009414 GO:0009693 GO:0009723 GO:0009737 GO:0009738 GO:0009873 GO:0010200 GO:0010286 GO:0035556 GO:0042538	abscisic acid mediated signaling pathway; biological process; ethylene biosynthetic process; ethylene mediated signaling pathway; heat acclimation; hyperosmotic salinity response; intracellular signal transduction; respiratory burst involved in defense response; response to abscisic acid stimulus; response to chitin; response to ethylene stimulus; response to water deprivation
Glyma.03G153000	-2.16787	0.00207625	AT1G03180.1|Symbols:|unknown protein; Has 36 Blast hits to 36 proteins in 15 species: Archae - 0; Bacteria - 0; Metazoa - 3; Fungi - 0; Plants - 33; Viruses - 0; Other Eukaryotes - 0 (source: NCBI BLink).|chr1:773543-775179 FORWARD LENGTH=265	2e-92	GO:0008150	biological process
Glyma.03G154000	-3.56094	3.24e-11	AT5G19330.1|Symbols:ARIA|ARM repeat protein interacting with ABF2|chr5:6508095-6512701 REVERSE LENGTH=710	0	GO:0000956 GO:0009651 GO:0009737 GO:0010187	negative regulation of seed germination; nuclear-transcribed mRNA catabolic process; response to abscisic acid stimulus; response to salt stress
Glyma.03G155200	-1.53333	0.000308455	AT4G02725.1|Symbols:|unknown protein; FUNCTIONS IN: molecular_function unknown; INVOLVED IN: biological_process unknown; LOCATED IN: chloroplast, membrane; Has 35333 Blast hits to 34131 proteins in 2444 species: Archae - 798; Bacteria - 22429; Metazoa - 974; Fungi - 991; Plants - 531; Viruses - 0; Other Eukaryotes - 9610 (source: NCBI BLink).|chr4:1206055-1207290 FORWARD LENGTH=165	1e-55	GO:0008150	biological process
Glyma.03G156700	1.22876	0.000897097	AT3G51895.1|Symbols:SULTR3;1, AST12|sulfate transporter 3;1|chr3:19251503-19255677 REVERSE LENGTH=658	0	GO:0008272	sulfate transport
Glyma.03G158100	-1.74058	1.83e-06	AT3G54560.1|Symbols:HTA11|histone H2A 11|chr3:20196532-20197466 FORWARD LENGTH=136	3e-78	GO:0006338 GO:0009908 GO:0009909 GO:0010468 GO:0016048 GO:0042742 GO:0044030	chromatin remodeling; defense response to bacterium; detection of temperature stimulus; flower development; regulation of DNA methylation; regulation of flower development; regulation of gene expression
Glyma.03G158700	1.26651	0.00613135	AT4G14550.1|Symbols:IAA14, SLR|indole-3-acetic acid inducible 14|chr4:8348521-8349923 REVERSE LENGTH=228	1e-95	GO:0006355 GO:0009733 GO:0009741 GO:0010102 GO:0010583 GO:0045892 GO:0048527	lateral root development; lateral root morphogenesis; negative regulation of transcription, DNA-dependent; regulation of transcription, DNA-dependent; response to auxin stimulus; response to brassinosteroid stimulus; response to cyclopentenone
Glyma.03G162900	0.936593	0.00028209	AT2G31200.1|Symbols:ADF6, ATADF6|actin depolymerizing factor 6|chr2:13294171-13294948 FORWARD LENGTH=146	1e-87	GO:0008150	biological process
Glyma.03G165600	-1.62859	0.00139072	AT1G04020.1|Symbols:ATBARD1, BARD1, ROW1|breast cancer associated RING 1|chr1:1036610-1040045 FORWARD LENGTH=714	4e-153	GO:0000278 GO:0000724 GO:0006260 GO:0006261 GO:0006275 GO:0006281 GO:0006306 GO:0008283 GO:0009555 GO:0009934 GO:0009965 GO:0016444 GO:0016568 GO:0031047 GO:0048366 GO:0051567 GO:0051726	DNA-dependent DNA replication; DNA methylation; DNA repair; DNA replication; cell proliferation; chromatin modification; double-strand break repair via homologous recombination; gene silencing by RNA; histone H3-K9 methylation; leaf development; leaf morphogenesis; mitotic cell cycle; pollen development; regulation of DNA replication; regulation of cell cycle; regulation of meristem structural or…
Glyma.03G166000	-1.65468	7.64e-06	AT5G44040.1|Symbols:|unknown protein; BEST Arabidopsis thaliana protein match is: unknown protein (TAIR:AT1G04030.1); Has 1807 Blast hits to 1807 proteins in 277 species: Archae - 0; Bacteria - 0; Metazoa - 736; Fungi - 347; Plants - 385; Viruses - 0; Other Eukaryotes - 339 (source: NCBI BLink).|chr5:17719896-17721348 REVERSE LENGTH=416	1e-40	GO:0008150	biological process
Glyma.03G170300	0.866306	0.00256759	AT2G20180.3|Symbols:PIL5|phytochrome interacting factor 3-like 5|chr2:8704276-8706538 REVERSE LENGTH=478	2e-85	GO:0006355 GO:0006783 GO:0009686 GO:0009740 GO:0009845 GO:0009959 GO:0010029 GO:0010099 GO:0010100 GO:0010161 GO:0010187 GO:0015995 GO:0048608	chlorophyll biosynthetic process; gibberellic acid mediated signaling pathway; gibberellin biosynthetic process; heme biosynthetic process; negative gravitropism; negative regulation of photomorphogenesis; negative regulation of seed germination; red light signaling pathway; regulation of photomorphogenesis; regulation of seed germination; regulation of transcription, DNA-dependent; reproductive …
Glyma.03G170900	-3.35489	6.54e-09	NA	NA	NA	NA
Glyma.03G171400	-2.45602	3.84e-10	AT5G59970.1|Symbols:|Histone superfamily protein|chr5:24146352-24146663 REVERSE LENGTH=103	7e-67	GO:0006334	nucleosome assembly
Glyma.03G171900	-6.35052	1.74e-12	AT2G37540.1|Symbols:|NAD(P)-binding Rossmann-fold superfamily protein|chr2:15751695-15753820 REVERSE LENGTH=321	7e-162	GO:0008152 GO:0009860	metabolic process; pollen tube growth
Glyma.03G172500	-1.59276	0.000248353	AT2G37470.1|Symbols:|Histone superfamily protein|chr2:15736832-15737248 FORWARD LENGTH=138	1e-78	GO:0006334	nucleosome assembly
Glyma.03G173800	-1.01278	0.00680456	AT2G37400.1|Symbols:|Tetratricopeptide repeat (TPR)-like superfamily protein|chr2:15696365-15697366 REVERSE LENGTH=333	2e-83	GO:0006626 GO:0008150	biological process; protein targeting to mitochondrion
Glyma.03G174300	2.28318	1.6e-06	AT3G09520.1|Symbols:ATEXO70H4, EXO70H4|exocyst subunit exo70 family protein H4|chr3:2923743-2925629 FORWARD LENGTH=628	0	GO:0006887 GO:0006904	exocytosis; vesicle docking involved in exocytosis
Glyma.03G177900	-2.20926	0.000572731	AT3G53320.1|Symbols:|unknown protein; BEST Arabidopsis thaliana protein match is: unknown protein (TAIR:AT2G37070.1); Has 11044 Blast hits to 5993 proteins in 551 species: Archae - 8; Bacteria - 1486; Metazoa - 4078; Fungi - 1814; Plants - 348; Viruses - 112; Other Eukaryotes - 3198 (source: NCBI BLink).|chr3:19769397-19772278 REVERSE LENGTH=553	4e-36	GO:0008150	biological process
Glyma.03G178100	-1.28431	0.00966759	AT2G37080.1|Symbols:RIP3|ROP interactive partner 3|chr2:15581565-15584057 REVERSE LENGTH=583	1e-170	GO:0000911	cytokinesis by cell plate formation
Glyma.03G178700	-1.76164	0.00533275	AT5G03110.1|Symbols:|FUNCTIONS IN: molecular_function unknown; INVOLVED IN: biological_process unknown; LOCATED IN: plasma membrane; BEST Arabidopsis thaliana protein match is: protamine P1 family protein (TAIR:AT2G37100.1); Has 81 Blast hits to 73 proteins in 9 species: Archae - 0; Bacteria - 0; Metazoa - 0; Fungi - 0; Plants - 81; Viruses - 0; Other Eukaryotes - 0 (source: NCBI BLink).|chr5:730…	4e-36	GO:0008150	biological process
Glyma.03G179100	0.862167	0.00750166	AT2G42760.1|Symbols:|unknown protein; CONTAINS InterPro DOMAIN/s: Protein of unknown function DUF1685 (InterPro:IPR012881); Has 170 Blast hits to 164 proteins in 34 species: Archae - 0; Bacteria - 1; Metazoa - 26; Fungi - 10; Plants - 107; Viruses - 0; Other Eukaryotes - 26 (source: NCBI BLink).|chr2:17796382-17797185 REVERSE LENGTH=267	1e-12	GO:0008150	biological process
Glyma.03G180000	1.38495	0.00989413	AT5G03170.1|Symbols:FLA11, ATFLA11|FASCICLIN-like arabinogalactan-protein 11|chr5:752898-753638 REVERSE LENGTH=246	3e-81	GO:0009834	secondary cell wall biogenesis
Glyma.03G183400	-0.845481	0.00549484	AT3G46100.1|Symbols:ATHRS1, HRS1|Histidyl-tRNA synthetase 1|chr3:16928444-16930984 REVERSE LENGTH=486	0	GO:0006418 GO:0006427	histidyl-tRNA aminoacylation; tRNA aminoacylation for protein translation
Glyma.03G185900	1.066	0.00452525	AT2G36830.1|Symbols:GAMMA-TIP, TIP1;1, GAMMA-TIP1|gamma tonoplast intrinsic protein|chr2:15445490-15446336 FORWARD LENGTH=251	8e-145	GO:0006096 GO:0006598 GO:0006810 GO:0006816 GO:0006833 GO:0006972 GO:0007030 GO:0009266 GO:0009269 GO:0009409 GO:0009651 GO:0009698 GO:0009737 GO:0009740 GO:0015840 GO:0042398 GO:0046686 GO:0055085 GO:0080170	Golgi organization; calcium ion transport; cellular modified amino acid biosynthetic process; gibberellic acid mediated signaling pathway; glycolysis; hydrogen peroxide transmembrane transport; hyperosmotic response; phenylpropanoid metabolic process; polyamine catabolic process; response to abscisic acid stimulus; response to cadmium ion; response to cold; response to desiccation; response to sa…
Glyma.03G192000	1.67987	0.000361822	AT5G03670.1|Symbols:|unknown protein; BEST Arabidopsis thaliana protein match is: unknown protein (TAIR:AT2G36420.1); Has 700 Blast hits to 624 proteins in 104 species: Archae - 0; Bacteria - 18; Metazoa - 333; Fungi - 60; Plants - 73; Viruses - 24; Other Eukaryotes - 192 (source: NCBI BLink).|chr5:947311-949898 FORWARD LENGTH=516	7e-98	GO:0008150 GO:0009888 GO:0030154	biological process; cell differentiation; tissue development
Glyma.03G192200	-1.87274	0.00681169	AT3G52910.1|Symbols:AtGRF4, GRF4|growth-regulating factor 4|chr3:19616177-19618268 REVERSE LENGTH=380	1e-87	GO:0006355 GO:0006626 GO:0048366	leaf development; protein targeting to mitochondrion; regulation of transcription, DNA-dependent
Glyma.03G193200	1.27667	0.000319614	AT3G52870.1|Symbols:|IQ calmodulin-binding motif family protein|chr3:19593365-19595686 REVERSE LENGTH=456	1e-80	GO:0008150	biological process
Glyma.03G195600	-2.15581	9.7e-08	AT3G27060.1|Symbols:TSO2, ATTSO2|Ferritin/ribonucleotide reductase-like family protein|chr3:9979971-9981057 REVERSE LENGTH=332	0	GO:0006260 GO:0006261 GO:0006281 GO:0007275 GO:0009165 GO:0009186 GO:0012501 GO:0051726 GO:0055114	DNA-dependent DNA replication; DNA repair; DNA replication; deoxyribonucleoside diphosphate metabolic process; multicellular organismal development; nucleotide biosynthetic process; oxidation-reduction process; programmed cell death; regulation of cell cycle
Glyma.03G196400	-2.30516	5.37e-05	AT5G03870.1|Symbols:|Glutaredoxin family protein|chr5:1035813-1036967 REVERSE LENGTH=384	8e-103	GO:0006499 GO:0045454 GO:0048653	N-terminal protein myristoylation; anther development; cell redox homeostasis
Glyma.03G197300	-3.68566	6.58e-09	AT2G36200.1|Symbols:|P-loop containing nucleoside triphosphate hydrolases superfamily protein|chr2:15180078-15185189 REVERSE LENGTH=1009	0	GO:0000226 GO:0000911 GO:0006260 GO:0006270 GO:0006275 GO:0006306 GO:0006342 GO:0007018 GO:0007067 GO:0007129 GO:0007131 GO:0008283 GO:0009909 GO:0010228 GO:0010564 GO:0016458 GO:0034968 GO:0051567 GO:0051726	DNA methylation; DNA replication; DNA replication initiation; cell proliferation; chromatin silencing; cytokinesis by cell plate formation; gene silencing; histone H3-K9 methylation; histone lysine methylation; microtubule-based movement; microtubule cytoskeleton organization; mitosis; reciprocal meiotic recombination; regulation of DNA replication; regulation of cell cycle; regulation of cell cy…
Glyma.03G201700	1.63799	0.0072553	NA	NA	NA	NA
Glyma.03G201800	-3.63646	1.1e-06	AT4G31400.1|Symbols:CTF7|damaged DNA binding;DNA-directed DNA polymerases|chr4:15237411-15239266 FORWARD LENGTH=345	1e-14	GO:0000070 GO:0000724 GO:0007062 GO:0009553 GO:0009790 GO:0034089 GO:0045132 GO:0048364 GO:0048653 GO:0060772	anther development; double-strand break repair via homologous recombination; embryo development; embryo sac development; establishment of meiotic sister chromatid cohesion; leaf phyllotactic patterning; meiotic chromosome segregation; mitotic sister chromatid segregation; root development; sister chromatid cohesion
Glyma.03G202400	1.45495	0.000438709	AT3G05675.1|Symbols:|BTB/POZ domain-containing protein|chr3:1658425-1659859 REVERSE LENGTH=441	0	NA	NA
Glyma.03G202900	-0.878492	0.00432369	AT3G52380.1|Symbols:CP33, PDE322|chloroplast RNA-binding protein 33|chr3:19421619-19422855 FORWARD LENGTH=329	1e-99	GO:0009793 GO:0010027 GO:0010228 GO:0016226 GO:0019288 GO:0048481	embryo development ending in seed dormancy; iron-sulfur cluster assembly; isopentenyl diphosphate biosynthetic process, mevalonate-independent pathway; ovule development; thylakoid membrane organization; vegetative to reproductive phase transition of meristem
Glyma.03G205000	-2.59735	1.29e-05	AT3G54750.1|Symbols:|unknown protein; Has 145 Blast hits to 145 proteins in 60 species: Archae - 0; Bacteria - 0; Metazoa - 99; Fungi - 0; Plants - 40; Viruses - 0; Other Eukaryotes - 6 (source: NCBI BLink).|chr3:20264833-20268416 REVERSE LENGTH=589	1e-166	GO:0006260 GO:0006306 GO:0008150 GO:0008283 GO:0051567	DNA methylation; DNA replication; biological process; cell proliferation; histone H3-K9 methylation
Glyma.03G206000	-2.44245	0.000576309	AT5G06590.1|Symbols:|unknown protein; Has 38 Blast hits to 38 proteins in 14 species: Archae - 0; Bacteria - 2; Metazoa - 0; Fungi - 0; Plants - 36; Viruses - 0; Other Eukaryotes - 0 (source: NCBI BLink).|chr5:2016713-2018744 FORWARD LENGTH=314	5e-86	GO:0006260 GO:0006261 GO:0006306 GO:0008150 GO:0008283 GO:0009909 GO:0034968 GO:0051567	DNA-dependent DNA replication; DNA methylation; DNA replication; biological process; cell proliferation; histone H3-K9 methylation; histone lysine methylation; regulation of flower development
Glyma.03G209100	-0.995063	0.00614937	AT1G03470.2|Symbols:|Kinase interacting (KIP1-like) family protein|chr1:866217-867493 REVERSE LENGTH=269	5e-51	GO:0008150	biological process
Glyma.03G209700	-2.14967	0.00846241	AT4G15630.1|Symbols:|Uncharacterised protein family (UPF0497)|chr4:8917527-8918683 FORWARD LENGTH=190	2e-38	GO:0008150	biological process
Glyma.03G211900	-2.46025	0.00128868	AT1G02970.1|Symbols:WEE1, ATWEE1|WEE1 kinase homolog|chr1:673408-676127 FORWARD LENGTH=500	0	GO:0000076 GO:0000278 GO:0000280 GO:0000724 GO:0000911 GO:0006260 GO:0006261 GO:0006270 GO:0006275 GO:0006306 GO:0007050 GO:0008283 GO:0009555 GO:0010389 GO:0016444 GO:0016568 GO:0031047 GO:0042023 GO:0051225 GO:0051567 GO:0051726	DNA-dependent DNA replication; DNA endoreduplication; DNA methylation; DNA replication; DNA replication checkpoint; DNA replication initiation; cell cycle arrest; cell proliferation; chromatin modification; cytokinesis by cell plate formation; double-strand break repair via homologous recombination; gene silencing by RNA; histone H3-K9 methylation; mitotic cell cycle; nuclear division; pollen dev…
Glyma.03G215600	-2.76558	4.74e-05	AT3G61740.2|Symbols:SDG14, ATX3|SET domain protein 14|chr3:22851133-22856548 REVERSE LENGTH=982	0	GO:0006355	regulation of transcription, DNA-dependent
Glyma.03G216100	-3.80631	0.000412786	AT4G02290.1|Symbols:AtGH9B13, GH9B13|glycosyl hydrolase 9B13|chr4:1002654-1005125 REVERSE LENGTH=516	0	GO:0005975 GO:0010089 GO:0044036	carbohydrate metabolic process; cell wall macromolecule metabolic process; xylem development
Glyma.03G217000	-1.08889	0.000423833	AT2G47500.1|Symbols:|P-loop nucleoside triphosphate hydrolases superfamily protein with CH (Calponin Homology) domain|chr2:19493247-19497882 FORWARD LENGTH=983	0	GO:0007018	microtubule-based movement
Glyma.03G217500	-2.33694	1.81e-06	AT1G02730.1|Symbols:ATCSLD5, CSLD5, SOS6|cellulose synthase-like D5|chr1:594697-598473 REVERSE LENGTH=1181	0	GO:0000226 GO:0000271 GO:0000724 GO:0000911 GO:0006970 GO:0009414 GO:0009651 GO:0009832 GO:0009965 GO:0010583 GO:0030244 GO:0042127 GO:0042546 GO:0048367	cell wall biogenesis; cellulose biosynthetic process; cytokinesis by cell plate formation; double-strand break repair via homologous recombination; leaf morphogenesis; microtubule cytoskeleton organization; plant-type cell wall biogenesis; polysaccharide biosynthetic process; regulation of cell proliferation; response to cyclopentenone; response to osmotic stress; response to salt stress; respons…
Glyma.03G217700	-2.12201	0.000858853	AT2G47485.1|Symbols:|unknown protein; BEST Arabidopsis thaliana protein match is: unknown protein (TAIR:AT3G62650.1); Has 35333 Blast hits to 34131 proteins in 2444 species: Archae - 798; Bacteria - 22429; Metazoa - 974; Fungi - 991; Plants - 531; Viruses - 0; Other Eukaryotes - 9610 (source: NCBI BLink).|chr2:19486004-19486429 FORWARD LENGTH=141	3e-25	NA	NA
Glyma.03G218800	-5.4483	1.1e-06	AT4G02090.1|Symbols:|unknown protein; FUNCTIONS IN: molecular_function unknown; INVOLVED IN: N-terminal protein myristoylation; LOCATED IN: cellular_component unknown; EXPRESSED IN: root; Has 132 Blast hits to 132 proteins in 12 species: Archae - 0; Bacteria - 0; Metazoa - 0; Fungi - 0; Plants - 132; Viruses - 0; Other Eukaryotes - 0 (source: NCBI BLink).|chr4:923122-923730 FORWARD LENGTH=202	4e-30	GO:0006499	N-terminal protein myristoylation
Glyma.03G219200	-2.66705	7.02e-07	AT4G02060.2|Symbols:PRL|Minichromosome maintenance (MCM2/3/5) family protein|chr4:901484-905297 FORWARD LENGTH=716	0	GO:0006260 GO:0006268 GO:0006270 GO:0006306 GO:0006342 GO:0008283 GO:0010182 GO:0051567	DNA methylation; DNA replication; DNA replication initiation; DNA unwinding involved in replication; cell proliferation; chromatin silencing; histone H3-K9 methylation; sugar mediated signaling pathway
Glyma.03G221100	-3.96098	0.0011391	AT1G02390.1|Symbols:ATGPAT2, GPAT2|glycerol-3-phosphate acyltransferase 2|chr1:480921-483163 FORWARD LENGTH=530	0	GO:0006655 GO:0008152	metabolic process; phosphatidylglycerol biosynthetic process
Glyma.03G221300	-3.321	7.09e-06	AT1G02390.1|Symbols:ATGPAT2, GPAT2|glycerol-3-phosphate acyltransferase 2|chr1:480921-483163 FORWARD LENGTH=530	0	GO:0006655 GO:0008152	metabolic process; phosphatidylglycerol biosynthetic process
Glyma.03G221400	-4.96926	6.93e-23	AT2G47240.2|Symbols:LACS1|AMP-dependent synthetase and ligase family protein|chr2:19393835-19397616 FORWARD LENGTH=660	0	GO:0001676 GO:0006631 GO:0006633 GO:0009627 GO:0010025 GO:0010103 GO:0010143 GO:0034976	cutin biosynthetic process; fatty acid biosynthetic process; fatty acid metabolic process; long-chain fatty acid metabolic process; response to endoplasmic reticulum stress; stomatal complex morphogenesis; systemic acquired resistance; wax biosynthetic process
Glyma.03G222600	-3.47069	0.00389206	AT2G47140.1|Symbols:|NAD(P)-binding Rossmann-fold superfamily protein|chr2:19350970-19352059 REVERSE LENGTH=257	4e-113	GO:0008152	metabolic process
Glyma.03G224100	-0.931259	0.00430143	AT1G02520.1|Symbols:PGP11|P-glycoprotein 11|chr1:524134-528745 FORWARD LENGTH=1278	0	GO:0006810 GO:0055085	transmembrane transport; transport
Glyma.03G225500	1.08316	0.00129651	AT3G62040.1|Symbols:|Haloacid dehalogenase-like hydrolase (HAD) superfamily protein|chr3:22975328-22976518 REVERSE LENGTH=249	2e-125	GO:0010167 GO:0015706	nitrate transport; response to nitrate
Glyma.03G226600	-0.815394	0.00756558	AT5G26742.2|Symbols:emb1138|DEAD box RNA helicase (RH3)|chr5:9285540-9288871 REVERSE LENGTH=748	0	GO:0009793	embryo development ending in seed dormancy
Glyma.03G227300	1.25437	0.000386987	AT1G09570.1|Symbols:PHYA, FHY2, FRE1, HY8|phytochrome A|chr1:3095498-3099216 REVERSE LENGTH=1122	0	GO:0006355 GO:0007165 GO:0007623 GO:0009584 GO:0009585 GO:0009630 GO:0009638 GO:0009640 GO:0010017 GO:0010161 GO:0010201 GO:0010203 GO:0010218 GO:0017006 GO:0017148 GO:0018106 GO:0018298 GO:0046685	circadian rhythm; detection of visible light; gravitropism; negative regulation of translation; peptidyl-histidine phosphorylation; photomorphogenesis; phototropism; protein-chromophore linkage; protein-tetrapyrrole linkage; red, far-red light phototransduction; red light signaling pathway; red or far-red light signaling pathway; regulation of transcription, DNA-dependent; response to arsenic-con…
Glyma.03G230300	-0.971072	0.00164141	AT4G15510.1|Symbols:|Photosystem II reaction center PsbP family protein|chr4:8860701-8862529 FORWARD LENGTH=287	4e-107	GO:0048564	photosystem I assembly
Glyma.03G231200	7.39471	3.71e-07	AT1G09240.1|Symbols:NAS3, ATNAS3|nicotianamine synthase 3|chr1:2984950-2985912 FORWARD LENGTH=320	2e-135	GO:0009555 GO:0009860 GO:0010233 GO:0030418	nicotianamine biosynthetic process; phloem transport; pollen development; pollen tube growth
Glyma.03G237700	-4.83126	0.000275469	AT3G05330.1|Symbols:ATN, ATTAN|cyclin family|chr3:1519162-1521159 REVERSE LENGTH=444	5e-70	GO:0000226 GO:0000278 GO:0000911 GO:0000914 GO:0007108 GO:0016572	cytokinesis, initiation of separation; cytokinesis by cell plate formation; histone phosphorylation; microtubule cytoskeleton organization; mitotic cell cycle; phragmoplast assembly
Glyma.03G239800	1.87013	4.39e-05	AT3G06130.2|Symbols:|Heavy metal transport/detoxification superfamily protein|chr3:1853193-1854673 REVERSE LENGTH=349	3e-28	GO:0030001	metal ion transport
Glyma.03G241800	-1.85182	7.36e-05	AT1G54690.1|Symbols:HTA3, H2AXB, G-H2AX, GAMMA-H2AX|gamma histone variant H2AX|chr1:20414607-20415206 REVERSE LENGTH=142	7e-71	GO:0001510 GO:0006334 GO:0008283	RNA methylation; cell proliferation; nucleosome assembly
Glyma.03G244400	2.38724	8.02e-09	AT5G17540.1|Symbols:|HXXXD-type acyl-transferase family protein|chr5:5782061-5783682 REVERSE LENGTH=461	3e-159	NA	NA
Glyma.03G246000	-1.58437	0.00164141	AT5G28300.1|Symbols:|Duplicated homeodomain-like superfamily protein|chr5:10292789-10295101 REVERSE LENGTH=619	2e-85	GO:0006355 GO:0045893	positive regulation of transcription, DNA-dependent; regulation of transcription, DNA-dependent
Glyma.03G247000	-0.857434	0.00320035	AT5G28840.2|Symbols:GME|GDP-D-mannose 3',5'-epimerase|chr5:10862472-10864024 REVERSE LENGTH=377	0	GO:0009225 GO:0019853 GO:0044237	L-ascorbic acid biosynthetic process; cellular metabolic process; nucleotide-sugar metabolic process
Glyma.03G248600	1.38719	1.1e-06	AT1G60690.1|Symbols:|NAD(P)-linked oxidoreductase superfamily protein|chr1:22349892-22351668 REVERSE LENGTH=345	2e-137	NA	NA
Glyma.03G249800	1.76301	4.35e-05	AT3G04380.1|Symbols:SUVR4, SDG31|SET-domain containing protein lysine methyltransferase family protein|chr3:1161602-1164539 FORWARD LENGTH=492	1e-169	GO:0034968	histone lysine methylation
Glyma.03G252700	2.2267	3.85e-05	AT5G33370.1|Symbols:|GDSL-like Lipase/Acylhydrolase superfamily protein|chr5:12602773-12604670 REVERSE LENGTH=366	0	GO:0006629	lipid metabolic process
Glyma.03G252800	-2.41195	1.22e-06	AT5G33370.1|Symbols:|GDSL-like Lipase/Acylhydrolase superfamily protein|chr5:12602773-12604670 REVERSE LENGTH=366	0	GO:0006629	lipid metabolic process
Glyma.03G253400	-1.16169	0.000464359	AT5G18310.2|Symbols:|unknown protein; FUNCTIONS IN: molecular_function unknown; INVOLVED IN: biological_process unknown; LOCATED IN: plasma membrane; EXPRESSED IN: 22 plant structures; EXPRESSED DURING: 13 growth stages; Has 60 Blast hits to 60 proteins in 14 species: Archae - 0; Bacteria - 0; Metazoa - 7; Fungi - 0; Plants - 53; Viruses - 0; Other Eukaryotes - 0 (source: NCBI BLink).|chr5:606175…	7e-19	GO:0008150	biological process
Glyma.04G001100	-2.15608	0.00227325	AT1G20610.1|Symbols:CYCB2;3|Cyclin B2;3|chr1:7135073-7137273 REVERSE LENGTH=429	1e-157	GO:0000079 GO:0051726	regulation of cell cycle; regulation of cyclin-dependent protein serine/threonine kinase activity
Glyma.04G002300	-0.958382	0.00521439	AT2G43030.1|Symbols:|Ribosomal protein L3 family protein|chr2:17894898-17895713 FORWARD LENGTH=271	3e-132	GO:0006364 GO:0006412 GO:0010207 GO:0015995 GO:0019288 GO:0045036	chlorophyll biosynthetic process; isopentenyl diphosphate biosynthetic process, mevalonate-independent pathway; photosystem II assembly; protein targeting to chloroplast; rRNA processing; translation
Glyma.04G002500	-1.75654	0.00291129	AT5G38110.1|Symbols:SGA1, SGA01, ASF1B|anti- silencing function 1b|chr5:15208643-15210064 FORWARD LENGTH=218	2e-102	GO:0000724 GO:0006139 GO:0006261 GO:0006333 GO:0008361 GO:0009294 GO:0010091 GO:0031567 GO:0051301	DNA-dependent DNA replication; DNA mediated transformation; cell division; cell size control checkpoint; chromatin assembly or disassembly; double-strand break repair via homologous recombination; nucleobase-containing compound metabolic process; regulation of cell size; trichome branching
Glyma.04G002600	-1.10294	0.000768021	AT3G06980.1|Symbols:|DEA(D/H)-box RNA helicase family protein|chr3:2201531-2204662 FORWARD LENGTH=781	0	GO:0006364 GO:0006399 GO:0006655 GO:0009658 GO:0009793 GO:0010103 GO:0016226 GO:0019288	chloroplast organization; embryo development ending in seed dormancy; iron-sulfur cluster assembly; isopentenyl diphosphate biosynthetic process, mevalonate-independent pathway; phosphatidylglycerol biosynthetic process; rRNA processing; stomatal complex morphogenesis; tRNA metabolic process
Glyma.04G002900	-1.24477	0.000374496	AT3G48730.1|Symbols:GSA2|glutamate-1-semialdehyde 2,1-aminomutase 2|chr3:18049697-18051550 FORWARD LENGTH=472	0	GO:0006098 GO:0006364 GO:0006779 GO:0009073 GO:0009965 GO:0015995 GO:0019344 GO:0030154 GO:0033014 GO:0045036 GO:0045893	aromatic amino acid family biosynthetic process; cell differentiation; chlorophyll biosynthetic process; cysteine biosynthetic process; leaf morphogenesis; pentose-phosphate shunt; porphyrin-containing compound biosynthetic process; positive regulation of transcription, DNA-dependent; protein targeting to chloroplast; rRNA processing; tetrapyrrole biosynthetic process
Glyma.04G004500	1.42597	0.000827893	AT4G34950.1|Symbols:|Major facilitator superfamily protein|chr4:16642544-16644759 REVERSE LENGTH=567	0	GO:0007623 GO:0019761	circadian rhythm; glucosinolate biosynthetic process
Glyma.04G005100	1.57275	4.87e-09	AT2G16630.1|Symbols:|Pollen Ole e 1 allergen and extensin family protein|chr2:7209286-7210872 FORWARD LENGTH=359	3e-101	NA	NA
Glyma.04G005600	1.41661	1.01e-05	NA	NA	NA	NA
Glyma.04G007800	1.70268	0.00197527	AT2G21270.2|Symbols:UFD1|ubiquitin fusion degradation 1|chr2:9108126-9110012 FORWARD LENGTH=319	3e-128	GO:0006511	ubiquitin-dependent protein catabolic process
Glyma.04G008200	-1.29895	0.0031352	AT2G21300.2|Symbols:|ATP binding microtubule motor family protein|chr2:9114396-9118292 REVERSE LENGTH=862	0	GO:0007018	microtubule-based movement
Glyma.04G009400	1.12013	0.00179321	AT1G20440.1|Symbols:COR47, RD17, AtCOR47|cold-regulated 47|chr1:7084722-7085664 REVERSE LENGTH=265	5e-22	GO:0006096 GO:0006833 GO:0006970 GO:0006972 GO:0007030 GO:0009266 GO:0009409 GO:0009414 GO:0009415 GO:0009631 GO:0009651 GO:0009737 GO:0010286 GO:0046686 GO:0050832	Golgi organization; cold acclimation; defense response to fungus; glycolysis; heat acclimation; hyperosmotic response; response to abscisic acid stimulus; response to cadmium ion; response to cold; response to osmotic stress; response to salt stress; response to temperature stimulus; response to water deprivation; response to water stimulus; water transport
Glyma.04G009600	-1.23202	0.00171699	AT4G34610.2|Symbols:BLH6|BEL1-like homeodomain 6|chr4:16530546-16532498 REVERSE LENGTH=532	8e-129	GO:0006355 GO:0048513	organ development; regulation of transcription, DNA-dependent
Glyma.04G011900	1.20871	0.00011782	AT4G39210.1|Symbols:APL3|Glucose-1-phosphate adenylyltransferase family protein|chr4:18260332-18263181 FORWARD LENGTH=521	0	GO:0009058 GO:0009853 GO:0019252	biosynthetic process; photorespiration; starch biosynthetic process
Glyma.04G012700	1.14238	0.00359469	AT2G21660.1|Symbols:ATGRP7, CCR2, GR-RBP7, GRP7|cold, circadian rhythm, and rna binding 2|chr2:9265477-9266316 REVERSE LENGTH=176	1e-42	GO:0000380 GO:0006094 GO:0006096 GO:0006406 GO:0006833 GO:0006970 GO:0006972 GO:0007030 GO:0007623 GO:0009266 GO:0009409 GO:0009414 GO:0009651 GO:0010043 GO:0010119 GO:0010228 GO:0010501 GO:0032508 GO:0045087 GO:0046686	DNA duplex unwinding; Golgi organization; RNA secondary structure unwinding; alternative mRNA splicing, via spliceosome; circadian rhythm; gluconeogenesis; glycolysis; hyperosmotic response; innate immune response; mRNA export from nucleus; regulation of stomatal movement; response to cadmium ion; response to cold; response to osmotic stress; response to salt stress; response to temperature stimu…
Glyma.04G013400	3.016	2.95e-06	AT1G49310.1|Symbols:|unknown protein; FUNCTIONS IN: molecular_function unknown; INVOLVED IN: biological_process unknown; LOCATED IN: endomembrane system; EXPRESSED IN: 9 plant structures; EXPRESSED DURING: LP.04 four leaves visible, petal differentiation and expansion stage; Has 11 Blast hits to 11 proteins in 6 species: Archae - 0; Bacteria - 0; Metazoa - 0; Fungi - 0; Plants - 11; Viruses - 0; …	4e-11	GO:0000041 GO:0008150	biological process; transition metal ion transport
Glyma.04G014000	1.58504	0.000395076	AT3G18830.1|Symbols:ATPLT5, PMT5, ATPMT5|polyol/monosaccharide transporter 5|chr3:6489000-6491209 REVERSE LENGTH=539	0	GO:0006810 GO:0031348 GO:0043090 GO:0055085	amino acid import; negative regulation of defense response; transmembrane transport; transport
Glyma.04G014600	-1.54364	1.95e-05	AT2G33620.4|Symbols:|AT hook motif DNA-binding family protein|chr2:14234749-14236563 FORWARD LENGTH=351	8e-74	GO:0007389 GO:0048438 GO:0048439	floral whorl development; flower morphogenesis; pattern specification process
Glyma.04G015000	1.75047	1.16e-07	AT4G35300.4|Symbols:TMT2|tonoplast monosaccharide transporter2|chr4:16796432-16799071 REVERSE LENGTH=739	0	GO:0006810 GO:0055085	transmembrane transport; transport
Glyma.04G017400	1.85413	0.00758252	AT1G20640.2|Symbols:|Plant regulator RWP-RK family protein|chr1:7155201-7157986 FORWARD LENGTH=844	0	GO:0009877	nodulation
Glyma.04G017600	0.813022	0.00957598	AT5G54770.1|Symbols:THI1, TZ, THI4|thiazole biosynthetic enzyme, chloroplast (ARA6) (THI1) (THI4)|chr5:22246634-22247891 FORWARD LENGTH=349	3e-09	GO:0000023 GO:0006974 GO:0009228 GO:0009409 GO:0009637 GO:0010155 GO:0018131 GO:0019252 GO:0042742 GO:0043085 GO:0046777	defense response to bacterium; maltose metabolic process; oxazole or thiazole biosynthetic process; positive regulation of catalytic activity; protein autophosphorylation; regulation of proton transport; response to DNA damage stimulus; response to blue light; response to cold; starch biosynthetic process; thiamine biosynthetic process
Glyma.04G017800	-2.56188	0.000191248	AT5G42330.1|Symbols:|unknown protein; Has 35333 Blast hits to 34131 proteins in 2444 species: Archae - 798; Bacteria - 22429; Metazoa - 974; Fungi - 991; Plants - 531; Viruses - 0; Other Eukaryotes - 9610 (source: NCBI BLink).|chr5:16926672-16927370 FORWARD LENGTH=205	2e-39	GO:0008150	biological process
Glyma.04G023700	0.849195	0.00395328	AT1G75800.1|Symbols:|Pathogenesis-related thaumatin superfamily protein|chr1:28458889-28460447 FORWARD LENGTH=330	8e-137	GO:0051707	response to other organism
Glyma.04G024300	1.13999	8.56e-06	AT1G75760.1|Symbols:|ER lumen protein retaining receptor family protein|chr1:28446940-28448421 REVERSE LENGTH=272	2e-176	GO:0006007 GO:0006621 GO:0015031	glucose catabolic process; protein retention in ER lumen; protein transport
Glyma.04G026100	-0.746526	0.00843246	AT1G19880.1|Symbols:|Regulator of chromosome condensation (RCC1) family protein|chr1:6900648-6903818 REVERSE LENGTH=538	0	GO:0008150	biological process
Glyma.04G026400	5.15832	0.00331347	AT1G75620.1|Symbols:|glyoxal oxidase-related protein|chr1:28394951-28396594 REVERSE LENGTH=547	0	GO:0008150 GO:0010413 GO:0045492	biological process; glucuronoxylan metabolic process; xylan biosynthetic process
Glyma.04G026700	-3.05231	0.00435934	AT1G75640.1|Symbols:|Leucine-rich receptor-like protein kinase family protein|chr1:28403600-28407022 REVERSE LENGTH=1140	0	GO:0006468 GO:0007169	protein phosphorylation; transmembrane receptor protein tyrosine kinase signaling pathway
Glyma.04G029200	-1.7269	0.00981228	AT1G75430.1|Symbols:BLH11|BEL1-like homeodomain 11|chr1:28308121-28309517 REVERSE LENGTH=290	2e-104	GO:0006355	regulation of transcription, DNA-dependent
Glyma.04G033100	-2.15894	0.00645	AT1G75150.1|Symbols:|unknown protein; Has 38228 Blast hits to 24529 proteins in 1168 species: Archae - 169; Bacteria - 4103; Metazoa - 14594; Fungi - 5866; Plants - 1861; Viruses - 317; Other Eukaryotes - 11318 (source: NCBI BLink).|chr1:28204709-28208512 REVERSE LENGTH=784	8e-76	GO:0006270 GO:0006275 GO:0006346 GO:0008150 GO:0016246 GO:0051726	DNA replication initiation; RNA interference; biological process; methylation-dependent chromatin silencing; regulation of DNA replication; regulation of cell cycle
Glyma.04G034700	1.81375	0.00366435	AT1G47550.1|Symbols:SEC3A|exocyst complex component sec3A|chr1:17457171-17463896 FORWARD LENGTH=887	0	GO:0008150	biological process
Glyma.04G036100	-3.34435	0.00173341	AT1G27040.2|Symbols:|Major facilitator superfamily protein|chr1:9386893-9389838 REVERSE LENGTH=563	1e-155	GO:0006857	oligopeptide transport
Glyma.04G038800	-2.90694	2.31e-06	AT4G33400.1|Symbols:|Vacuolar import/degradation, Vid27-related protein|chr4:16078189-16080410 REVERSE LENGTH=645	0	GO:0006260 GO:0006275 GO:0006306 GO:0006342 GO:0006499 GO:0008283 GO:0009640 GO:0009909 GO:0010388 GO:0010389 GO:0016458 GO:0016567 GO:0016571 GO:0016572 GO:0016579 GO:0031047 GO:0034968 GO:0045893 GO:0051567	DNA methylation; DNA replication; N-terminal protein myristoylation; cell proliferation; chromatin silencing; cullin deneddylation; gene silencing; gene silencing by RNA; histone H3-K9 methylation; histone lysine methylation; histone methylation; histone phosphorylation; photomorphogenesis; positive regulation of transcription, DNA-dependent; protein deubiquitination; protein ubiquitination; regu…
Glyma.04G041300	0.948237	0.00528564	AT5G47820.2|Symbols:FRA1|P-loop containing nucleoside triphosphate hydrolases superfamily protein|chr5:19366505-19372229 FORWARD LENGTH=1035	0	GO:0000394 GO:0007018 GO:0009086 GO:0010075 GO:0010215	RNA splicing, via endonucleolytic cleavage and ligation; cellulose microfibril organization; methionine biosynthetic process; microtubule-based movement; regulation of meristem growth
Glyma.04G043400	-1.90912	0.00574168	AT5G43080.1|Symbols:CYCA3;1|Cyclin A3;1|chr5:17293227-17294789 FORWARD LENGTH=355	4e-117	GO:0000079 GO:0000724 GO:0010389 GO:0051726	double-strand break repair via homologous recombination; regulation of G2/M transition of mitotic cell cycle; regulation of cell cycle; regulation of cyclin-dependent protein serine/threonine kinase activity
Glyma.04G043500	-4.43655	5.1e-05	AT5G43080.1|Symbols:CYCA3;1|Cyclin A3;1|chr5:17293227-17294789 FORWARD LENGTH=355	2e-125	GO:0000079 GO:0000724 GO:0010389 GO:0051726	double-strand break repair via homologous recombination; regulation of G2/M transition of mitotic cell cycle; regulation of cell cycle; regulation of cyclin-dependent protein serine/threonine kinase activity
Glyma.04G043600	-2.66423	9.54e-08	AT5G43080.1|Symbols:CYCA3;1|Cyclin A3;1|chr5:17293227-17294789 FORWARD LENGTH=355	3e-132	GO:0000079 GO:0000724 GO:0010389 GO:0051726	double-strand break repair via homologous recombination; regulation of G2/M transition of mitotic cell cycle; regulation of cell cycle; regulation of cyclin-dependent protein serine/threonine kinase activity
Glyma.04G043700	-2.08388	0.00211067	AT5G43080.1|Symbols:CYCA3;1|Cyclin A3;1|chr5:17293227-17294789 FORWARD LENGTH=355	7e-126	GO:0000079 GO:0000724 GO:0010389 GO:0051726	double-strand break repair via homologous recombination; regulation of G2/M transition of mitotic cell cycle; regulation of cell cycle; regulation of cyclin-dependent protein serine/threonine kinase activity
Glyma.04G051200	-1.20828	0.00809327	AT4G33010.1|Symbols:AtGLDP1, GLDP1|glycine decarboxylase P-protein 1|chr4:15926852-15931150 REVERSE LENGTH=1037	0	GO:0000023 GO:0000096 GO:0006098 GO:0006544 GO:0006546 GO:0006636 GO:0006733 GO:0006766 GO:0008652 GO:0009069 GO:0009072 GO:0009073 GO:0009106 GO:0009108 GO:0009117 GO:0009695 GO:0009965 GO:0010304 GO:0015995 GO:0019252 GO:0019288 GO:0019344 GO:0019464 GO:0019748 GO:0030154 GO:0042545 GO:0043085 GO:0044272 GO:0045893 GO:0046686 GO:0055114	PSII associated light-harvesting complex II catabolic process; aromatic amino acid family biosynthetic process; aromatic amino acid family metabolic process; cell differentiation; cell wall modification; cellular amino acid biosynthetic process; chlorophyll biosynthetic process; coenzyme biosynthetic process; cysteine biosynthetic process; glycine catabolic process; glycine decarboxylation via gl…
Glyma.04G052200	-3.00163	0.000158351	AT2G26180.1|Symbols:IQD6|IQ-domain 6|chr2:11143433-11144982 REVERSE LENGTH=416	2e-144	NA	NA
Glyma.04G052600	1.65176	9.69e-06	AT5G11950.2|Symbols:|Putative lysine decarboxylase family protein|chr5:3855072-3856815 FORWARD LENGTH=216	7e-123	GO:0009089	lysine biosynthetic process via diaminopimelate
Glyma.04G055600	1.79019	0.00139476	AT5G21482.1|Symbols:CKX7, ATCKX5|cytokinin oxidase 7|chr5:7226842-7230052 FORWARD LENGTH=524	0	GO:0009690 GO:0009823 GO:0055114	cytokinin catabolic process; cytokinin metabolic process; oxidation-reduction process
Glyma.04G056400	-1.15546	0.00027279	AT4G33200.1|Symbols:XI-I, ATXI-I, XI-15|myosin, putative|chr4:16002768-16014792 REVERSE LENGTH=1522	0	GO:0006606 GO:0030048 GO:0051645 GO:0051646 GO:0060151	Golgi localization; actin filament-based movement; mitochondrion localization; peroxisome localization; protein import into nucleus
Glyma.04G057800	1.10588	0.0060978	AT2G26250.1|Symbols:FDH, KCS10|3-ketoacyl-CoA synthase 10|chr2:11170799-11173059 REVERSE LENGTH=550	0	GO:0000038 GO:0006633 GO:0008152 GO:0008610 GO:0009409 GO:0009416 GO:0009913 GO:0042335 GO:0080167	cuticle development; epidermal cell differentiation; fatty acid biosynthetic process; lipid biosynthetic process; metabolic process; response to cold; response to karrikin; response to light stimulus; very long-chain fatty acid metabolic process
Glyma.04G058400	-2.14953	2.61e-07	AT5G10720.1|Symbols:AHK5, CKI2, HK5|histidine kinase 5|chr5:3386835-3390541 FORWARD LENGTH=922	0	GO:0000160 GO:0006355 GO:0007165 GO:0009736 GO:0009788 GO:0010048 GO:0010105 GO:0016310 GO:0018106 GO:0043481 GO:0048364 GO:0048440 GO:0070301 GO:0071219 GO:0071732 GO:0090333	anthocyanin accumulation in tissues in response to UV light; carpel development; cellular response to hydrogen peroxide; cellular response to molecule of bacterial origin; cellular response to nitric oxide; cytokinin mediated signaling pathway; negative regulation of abscisic acid mediated signaling pathway; negative regulation of ethylene mediated signaling pathway; peptidyl-histidine phosphoryl…
Glyma.04G059800	-0.762487	0.00756105	AT2G24820.1|Symbols:TIC55-II|translocon at the inner envelope membrane of chloroplasts 55-II|chr2:10575038-10576829 FORWARD LENGTH=539	0	GO:0045036 GO:0055114	oxidation-reduction process; protein targeting to chloroplast
Glyma.04G060600	-1.87318	0.0040245	AT2G25060.1|Symbols:ENODL14, AtENODL14|early nodulin-like protein 14|chr2:10662308-10662930 FORWARD LENGTH=182	4e-58	GO:0000226 GO:0000911 GO:0016572	cytokinesis by cell plate formation; histone phosphorylation; microtubule cytoskeleton organization
Glyma.04G060800	-2.82099	3.83e-06	AT4G31820.1|Symbols:ENP, NPY1, MAB4|Phototropic-responsive NPH3 family protein|chr4:15390788-15393627 REVERSE LENGTH=571	0	GO:0009416 GO:0009908 GO:0009911 GO:0010229 GO:0010540 GO:0045176 GO:0048825 GO:0048827	apical protein localization; basipetal auxin transport; cotyledon development; flower development; inflorescence development; phyllome development; positive regulation of flower development; response to light stimulus
Glyma.04G062100	-0.934524	0.00597706	AT4G39952.1|Symbols:|Pentatricopeptide repeat (PPR) superfamily protein|chr4:18527680-18530007 FORWARD LENGTH=775	0	GO:0008150	biological process
Glyma.04G064500	-2.38836	9.04e-05	AT2G25270.1|Symbols:|unknown protein; LOCATED IN: plasma membrane; EXPRESSED IN: 18 plant structures; EXPRESSED DURING: 13 growth stages; BEST Arabidopsis thaliana protein match is: unknown protein (TAIR:AT2G12400.1); Has 35333 Blast hits to 34131 proteins in 2444 species: Archae - 798; Bacteria - 22429; Metazoa - 974; Fungi - 991; Plants - 531; Viruses - 0; Other Eukaryotes - 9610 (source: NCBI …	0	GO:0031507 GO:0045787	heterochromatin assembly; positive regulation of cell cycle
Glyma.04G065600	1.12805	0.000261395	AT2G45180.1|Symbols:|Bifunctional inhibitor/lipid-transfer protein/seed storage 2S albumin superfamily protein|chr2:18626377-18626781 FORWARD LENGTH=134	2e-36	GO:0000038 GO:0006869 GO:0042335	cuticle development; lipid transport; very long-chain fatty acid metabolic process
Glyma.04G067700	-0.759463	0.00434421	AT5G25400.1|Symbols:|Nucleotide-sugar transporter family protein|chr5:8823283-8824332 FORWARD LENGTH=349	0	GO:0010584	pollen exine formation
Glyma.04G068000	-0.921249	0.00605547	AT5G11270.1|Symbols:OCP3|overexpressor of cationic peroxidase 3|chr5:3595557-3597076 REVERSE LENGTH=354	1e-68	GO:0006355 GO:0006952 GO:0009414 GO:0009737 GO:0009867 GO:0010118 GO:0050832	defense response; defense response to fungus; jasmonic acid mediated signaling pathway; regulation of transcription, DNA-dependent; response to abscisic acid stimulus; response to water deprivation; stomatal movement
Glyma.04G068500	1.94792	0.000190154	AT5G20060.3|Symbols:|alpha/beta-Hydrolases superfamily protein|chr5:6776800-6779447 FORWARD LENGTH=252	7e-129	NA	NA
Glyma.04G071600	-3.31435	4.68e-06	AT5G11300.1|Symbols:CYC3B, CYC2BAT, CYCA2;2|mitotic-like cyclin 3B from Arabidopsis|chr5:3601811-3604466 REVERSE LENGTH=436	4e-158	GO:0000079 GO:0008283 GO:0010090 GO:0010389 GO:0042023 GO:0043161 GO:0043248 GO:0051302 GO:0051510 GO:0051726 GO:0051788 GO:2000123	DNA endoreduplication; cell proliferation; positive regulation of stomatal complex development; proteasomal ubiquitin-dependent protein catabolic process; proteasome assembly; regulation of G2/M transition of mitotic cell cycle; regulation of cell cycle; regulation of cell division; regulation of cyclin-dependent protein serine/threonine kinase activity; regulation of unidimensional cell growth; …
Glyma.04G072300	-0.88001	0.00429503	AT5G11450.1|Symbols:|Mog1/PsbP/DUF1795-like photosystem II reaction center PsbP family protein|chr5:3654475-3656357 FORWARD LENGTH=297	2e-114	GO:0000023 GO:0010027 GO:0015979 GO:0019252 GO:0019288 GO:0045036 GO:0045893	isopentenyl diphosphate biosynthetic process, mevalonate-independent pathway; maltose metabolic process; photosynthesis; positive regulation of transcription, DNA-dependent; protein targeting to chloroplast; starch biosynthetic process; thylakoid membrane organization
Glyma.04G075800	2.87201	0.00413646	AT5G10695.1|Symbols:|unknown protein; BEST Arabidopsis thaliana protein match is: unknown protein (TAIR:AT5G57123.1); Has 30201 Blast hits to 17322 proteins in 780 species: Archae - 12; Bacteria - 1396; Metazoa - 17338; Fungi - 3422; Plants - 5037; Viruses - 0; Other Eukaryotes - 2996 (source: NCBI BLink).|chr5:3377817-3378020 FORWARD LENGTH=67	6e-27	GO:0006612 GO:0006944 GO:0008150 GO:0010286 GO:0010363 GO:0030968 GO:0043069	biological process; cellular membrane fusion; endoplasmic reticulum unfolded protein response; heat acclimation; negative regulation of programmed cell death; protein targeting to membrane; regulation of plant-type hypersensitive response
Glyma.04G077000	-2.25685	0.000128338	AT4G20325.1|Symbols:|FUNCTIONS IN: molecular_function unknown; INVOLVED IN: biological_process unknown; LOCATED IN: nucleus; CONTAINS InterPro DOMAIN/s: Ribonuclease H2, subunit B (InterPro:IPR019024); Has 30201 Blast hits to 17322 proteins in 780 species: Archae - 12; Bacteria - 1396; Metazoa - 17338; Fungi - 3422; Plants - 5037; Viruses - 0; Other Eukaryotes - 2996 (source: NCBI BLink).|chr4:10…	3e-110	GO:0008150	biological process
Glyma.04G079100	-3.63533	0.000897077	NA	NA	NA	NA
Glyma.04G079600	1.7909	0.00297423	AT5G25610.1|Symbols:RD22, ATRD22|BURP domain-containing protein|chr5:8914498-8916684 REVERSE LENGTH=392	1e-124	GO:0009269 GO:0009409 GO:0009651 GO:0009737	response to abscisic acid stimulus; response to cold; response to desiccation; response to salt stress
Glyma.04G080600	-2.83232	4.81e-10	AT4G32730.2|Symbols:PC-MYB1, MYB3R-1, ATMYB3R-1, ATMYB3R1|Homeodomain-like protein|chr4:15791039-15795643 FORWARD LENGTH=995	0	GO:0000911 GO:0006355	cytokinesis by cell plate formation; regulation of transcription, DNA-dependent
Glyma.04G086300	1.05897	0.000208363	AT5G25880.1|Symbols:ATNADP-ME3, NADP-ME3|NADP-malic enzyme 3|chr5:9024549-9028260 FORWARD LENGTH=588	0	GO:0006094 GO:0006108 GO:0006499 GO:0007010 GO:0009827 GO:0009860 GO:0010498 GO:0051260 GO:0055114	N-terminal protein myristoylation; cytoskeleton organization; gluconeogenesis; malate metabolic process; oxidation-reduction process; plant-type cell wall modification; pollen tube growth; proteasomal protein catabolic process; protein homooligomerization
Glyma.04G087000	-1.8891	1.47e-07	AT1G21600.2|Symbols:PTAC6|plastid transcriptionally active 6|chr1:7571514-7573782 REVERSE LENGTH=328	2e-151	GO:0006364 GO:0006417 GO:0009657 GO:0009902 GO:0009965 GO:0010027 GO:0010207 GO:0030154 GO:0034660 GO:0035304 GO:0042793 GO:0045893	cell differentiation; chloroplast relocation; leaf morphogenesis; ncRNA metabolic process; photosystem II assembly; plastid organization; positive regulation of transcription, DNA-dependent; rRNA processing; regulation of protein dephosphorylation; regulation of translation; thylakoid membrane organization; transcription from plastid promoter
Glyma.04G087100	-1.69591	0.000279339	AT4G32830.1|Symbols:AtAUR1, AUR1|ataurora1|chr4:15842557-15844354 FORWARD LENGTH=294	0	GO:0000278 GO:0006342 GO:0016572 GO:0051567	chromatin silencing; histone H3-K9 methylation; histone phosphorylation; mitotic cell cycle
Glyma.04G088700	1.20551	0.00043883	AT5G49660.1|Symbols:|Leucine-rich repeat transmembrane protein kinase family protein|chr5:20161401-20164534 REVERSE LENGTH=966	0	GO:0002237 GO:0006468 GO:0006612 GO:0007165 GO:0009963 GO:0010051 GO:0010103 GO:0010363 GO:0048443	positive regulation of flavonoid biosynthetic process; protein phosphorylation; protein targeting to membrane; regulation of plant-type hypersensitive response; response to molecule of bacterial origin; signal transduction; stamen development; stomatal complex morphogenesis; xylem and phloem pattern formation
Glyma.04G091800	-1.5037	0.000392567	AT1G09750.1|Symbols:|Eukaryotic aspartyl protease family protein|chr1:3157541-3158960 FORWARD LENGTH=449	0	GO:0006508	proteolysis
Glyma.04G092400	1.0267	0.00070708	AT4G24620.1|Symbols:PGI1, PGI|phosphoglucose isomerase 1|chr4:12708972-12712610 REVERSE LENGTH=613	0	GO:0000023 GO:0000272 GO:0005982 GO:0006094 GO:0006096 GO:0009664 GO:0009911 GO:0019252 GO:0019288 GO:0043085	gluconeogenesis; glycolysis; isopentenyl diphosphate biosynthetic process, mevalonate-independent pathway; maltose metabolic process; plant-type cell wall organization; polysaccharide catabolic process; positive regulation of catalytic activity; positive regulation of flower development; starch biosynthetic process; starch metabolic process
Glyma.04G093300	-1.99777	6.24e-11	AT4G24660.1|Symbols:ATHB22, MEE68, HB22, ZHD2|homeobox protein 22|chr4:12724851-12725513 REVERSE LENGTH=220	2e-65	GO:0009686 GO:0009737 GO:0009740 GO:0009793 GO:0009845 GO:0010162 GO:0048608	embryo development ending in seed dormancy; gibberellic acid mediated signaling pathway; gibberellin biosynthetic process; reproductive structure development; response to abscisic acid stimulus; seed dormancy process; seed germination
Glyma.04G094200	1.12014	0.00312947	AT1G58200.2|Symbols:MSL3|MSCS-like 3|chr1:21548370-21552488 REVERSE LENGTH=678	3e-150	GO:0006970 GO:0009657 GO:0009694 GO:0009753 GO:0010020 GO:0055085	chloroplast fission; jasmonic acid metabolic process; plastid organization; response to jasmonic acid stimulus; response to osmotic stress; transmembrane transport
Glyma.04G094400	-1.68422	1.45e-05	AT5G60930.1|Symbols:|P-loop containing nucleoside triphosphate hydrolases superfamily protein|chr5:24515398-24522511 REVERSE LENGTH=1294	0	GO:0000911 GO:0007018 GO:0008283	cell proliferation; cytokinesis by cell plate formation; microtubule-based movement
Glyma.04G098600	-1.11182	0.000174486	AT4G09040.1|Symbols:|RNA-binding (RRM/RBD/RNP motifs) family protein|chr4:5795075-5797315 REVERSE LENGTH=304	1e-79	GO:0000398 GO:0008150	biological process; mRNA splicing, via spliceosome
Glyma.04G100400	1.75995	0.000169957	AT4G08950.1|Symbols:EXO|Phosphate-responsive 1 family protein|chr4:5740378-5741322 FORWARD LENGTH=314	9e-156	GO:0009741 GO:0016126	response to brassinosteroid stimulus; sterol biosynthetic process
Glyma.04G100700	1.23688	0.00018338	AT1G78240.2|Symbols:TSD2, QUA2|S-adenosyl-L-methionine-dependent methyltransferases superfamily protein|chr1:29433173-29435815 REVERSE LENGTH=684	0	GO:0009735 GO:0010289 GO:0048364 GO:0048367	homogalacturonan biosynthetic process; response to cytokinin stimulus; root development; shoot system development
Glyma.04G101000	1.34693	0.000432916	AT1G78230.1|Symbols:|Outer arm dynein light chain 1 protein|chr1:29430226-29432516 FORWARD LENGTH=681	3e-169	GO:0008150	biological process
Glyma.04G104200	1.36798	0.00323492	AT1G78070.1|Symbols:|Transducin/WD40 repeat-like superfamily protein|chr1:29355219-29358368 FORWARD LENGTH=449	0	GO:0008150	biological process
Glyma.04G104400	2.23985	9.94e-05	AT1G22180.2|Symbols:|Sec14p-like phosphatidylinositol transfer family protein|chr1:7828434-7829745 REVERSE LENGTH=314	2e-112	GO:0008150 GO:0031348	biological process; negative regulation of defense response
Glyma.04G107900	1.02995	0.000371322	AT3G53990.1|Symbols:|Adenine nucleotide alpha hydrolases-like superfamily protein|chr3:19989658-19991019 REVERSE LENGTH=160	2e-87	GO:0009409	response to cold
Glyma.04G108500	-3.51407	0.000707905	AT1G53540.1|Symbols:|HSP20-like chaperones superfamily protein|chr1:19980510-19980983 FORWARD LENGTH=157	4e-27	GO:0006457 GO:0009408 GO:0009644 GO:0034976 GO:0042542	protein folding; response to endoplasmic reticulum stress; response to heat; response to high light intensity; response to hydrogen peroxide
Glyma.04G109900	-4.47645	2.11e-05	AT5G33370.1|Symbols:|GDSL-like Lipase/Acylhydrolase superfamily protein|chr5:12602773-12604670 REVERSE LENGTH=366	0	GO:0006629	lipid metabolic process
Glyma.04G112500	1.48763	7.69e-06	AT5G56170.1|Symbols:LLG1|LORELEI-LIKE-GPI-ANCHORED PROTEIN 1|chr5:22736072-22737108 FORWARD LENGTH=168	9e-58	GO:0008150	biological process
Glyma.04G115600	-1.9913	0.000864439	AT5G22350.1|Symbols:ELM1|Protein of unknown function (DUF1022)|chr5:7397762-7400746 REVERSE LENGTH=427	2e-38	GO:0000266 GO:0033365	mitochondrial fission; protein localization to organelle
Glyma.04G121000	2.32931	0.00052146	AT4G29330.1|Symbols:DER1|DERLIN-1|chr4:14444937-14446952 FORWARD LENGTH=266	4e-99	GO:0006457 GO:0006508 GO:0009408 GO:0009644 GO:0034976 GO:0042542	protein folding; proteolysis; response to endoplasmic reticulum stress; response to heat; response to high light intensity; response to hydrogen peroxide
Glyma.04G124800	1.24121	0.000202746	AT5G13750.1|Symbols:ZIFL1|zinc induced facilitator-like 1|chr5:4438318-4441289 FORWARD LENGTH=478	0	GO:0009414 GO:0009630 GO:0010540 GO:0048364 GO:0080167 GO:0090333	basipetal auxin transport; gravitropism; regulation of stomatal closure; response to karrikin; response to water deprivation; root development
Glyma.04G133400	1.59393	0.000473709	AT3G12320.1|Symbols:|unknown protein; BEST Arabidopsis thaliana protein match is: unknown protein (TAIR:AT5G06980.4); Has 102 Blast hits to 102 proteins in 16 species: Archae - 0; Bacteria - 0; Metazoa - 0; Fungi - 0; Plants - 98; Viruses - 0; Other Eukaryotes - 4 (source: NCBI BLink).|chr3:3924034-3925262 FORWARD LENGTH=269	5e-16	GO:0007623 GO:0009651 GO:0009737 GO:0010264	circadian rhythm; myo-inositol hexakisphosphate biosynthetic process; response to abscisic acid stimulus; response to salt stress
Glyma.04G133700	-3.2176	1.55e-06	AT1G80190.1|Symbols:PSF1|partner of SLD five 1|chr1:30159476-30161115 FORWARD LENGTH=201	1e-96	GO:0006261 GO:0006270	DNA-dependent DNA replication; DNA replication initiation
Glyma.04G135300	-1.52733	0.00021163	AT3G06730.1|Symbols:TRX P, TRX z|Thioredoxin z|chr3:2124276-2125845 FORWARD LENGTH=183	1e-80	GO:0006364 GO:0006399 GO:0006662 GO:0009657 GO:0009658 GO:0042793 GO:0045036 GO:0045454 GO:0045893	cell redox homeostasis; chloroplast organization; glycerol ether metabolic process; plastid organization; positive regulation of transcription, DNA-dependent; protein targeting to chloroplast; rRNA processing; tRNA metabolic process; transcription from plastid promoter
Glyma.04G139600	-3.23274	0.00393998	NA	NA	NA	NA
Glyma.04G139700	-1.05187	0.00454794	AT4G10300.1|Symbols:|RmlC-like cupins superfamily protein|chr4:6384564-6385946 FORWARD LENGTH=134	2e-10	GO:0000023 GO:0019252 GO:0019288	isopentenyl diphosphate biosynthetic process, mevalonate-independent pathway; maltose metabolic process; starch biosynthetic process
Glyma.04G147800	-1.01238	0.000282433	AT3G47650.1|Symbols:|DnaJ/Hsp40 cysteine-rich domain superfamily protein|chr3:17569576-17570262 FORWARD LENGTH=136	9e-40	GO:0006098 GO:0006364 GO:0009657 GO:0009773 GO:0010207 GO:0019288	isopentenyl diphosphate biosynthetic process, mevalonate-independent pathway; pentose-phosphate shunt; photosynthetic electron transport in photosystem I; photosystem II assembly; plastid organization; rRNA processing
Glyma.04G154200	1.31292	0.00943392	AT5G13460.1|Symbols:IQD11|IQ-domain 11|chr5:4316323-4318247 FORWARD LENGTH=443	2e-92	GO:0000271 GO:0008150 GO:0042546	biological process; cell wall biogenesis; polysaccharide biosynthetic process
Glyma.04G157900	2.15131	0.00263992	AT5G38790.1|Symbols:|unknown protein; BEST Arabidopsis thaliana protein match is: unknown protein (TAIR:AT3G30580.1); Has 1807 Blast hits to 1807 proteins in 277 species: Archae - 0; Bacteria - 0; Metazoa - 736; Fungi - 347; Plants - 385; Viruses - 0; Other Eukaryotes - 339 (source: NCBI BLink).|chr5:15533785-15534180 FORWARD LENGTH=131	5e-06	GO:0008150	biological process
Glyma.04G158400	-3.20088	4.05e-05	AT3G42660.1|Symbols:|transducin family protein / WD-40 repeat family protein|chr3:14751280-14755701 FORWARD LENGTH=953	0	GO:0006260 GO:0006261 GO:0006270 GO:0006275 GO:0006306 GO:0008150 GO:0008283 GO:0009909 GO:0010389 GO:0016458 GO:0016570 GO:0034968 GO:0048449 GO:0051567 GO:0051726	DNA-dependent DNA replication; DNA methylation; DNA replication; DNA replication initiation; biological process; cell proliferation; floral organ formation; gene silencing; histone H3-K9 methylation; histone lysine methylation; histone modification; regulation of DNA replication; regulation of G2/M transition of mitotic cell cycle; regulation of cell cycle; regulation of flower development
Glyma.04G173200	-2.88414	4.23e-07	AT5G62550.1|Symbols:|unknown protein; FUNCTIONS IN: molecular_function unknown; INVOLVED IN: biological_process unknown; LOCATED IN: plasma membrane; EXPRESSED IN: 17 plant structures; EXPRESSED DURING: 9 growth stages; Has 14949 Blast hits to 9947 proteins in 971 species: Archae - 43; Bacteria - 3248; Metazoa - 4424; Fungi - 1542; Plants - 562; Viruses - 55; Other Eukaryotes - 5075 (source: NCBI…	2e-49	GO:0008150	biological process
Glyma.04G176200	-6.37554	0.00066093	AT2G17860.1|Symbols:|Pathogenesis-related thaumatin superfamily protein|chr2:7762257-7763018 REVERSE LENGTH=253	5e-63	GO:0051707	response to other organism
Glyma.04G179400	2.31195	0.00613346	AT5G50100.1|Symbols:|Putative thiol-disulphide oxidoreductase DCC|chr5:20371916-20373172 FORWARD LENGTH=214	2e-82	GO:0008150 GO:0010264	biological process; myo-inositol hexakisphosphate biosynthetic process
Glyma.04G182000	-0.910073	0.000508017	AT1G27510.1|Symbols:|Protein of unknown function (DUF3506)|chr1:9554945-9558293 REVERSE LENGTH=651	0	GO:0000304 GO:0010343	response to singlet oxygen; singlet oxygen-mediated programmed cell death
Glyma.04G185200	1.09028	0.00109692	AT1G17720.1|Symbols:ATB BETA|Protein phosphatase 2A, regulatory subunit PR55|chr1:6093949-6098065 REVERSE LENGTH=501	0	GO:0006470 GO:0007165	protein dephosphorylation; signal transduction
Glyma.04G185800	1.27036	0.00026154	AT5G50150.1|Symbols:|Protein of Unknown Function (DUF239)|chr5:20402444-20406375 REVERSE LENGTH=420	0	GO:0008150	biological process
Glyma.04G187600	-3.19315	3.62e-10	AT5G49160.1|Symbols:MET1, MET2, METI, DDM2, DMT01, DMT1|methyltransferase 1|chr5:19932501-19938186 FORWARD LENGTH=1534	0	GO:0006260 GO:0006261 GO:0006306 GO:0006333 GO:0006342 GO:0006349 GO:0008283 GO:0009294 GO:0009909 GO:0009910 GO:0010069 GO:0010216 GO:0010424 GO:0016458 GO:0034968 GO:0051567 GO:0090116	C-5 methylation of cytosine; DNA-dependent DNA replication; DNA mediated transformation; DNA methylation; DNA methylation on cytosine within a CG sequence; DNA replication; cell proliferation; chromatin assembly or disassembly; chromatin silencing; gene silencing; histone H3-K9 methylation; histone lysine methylation; maintenance of DNA methylation; negative regulation of flower development; regu…
Glyma.04G190300	-1.18704	0.000724146	AT3G01680.1|Symbols:|CONTAINS InterPro DOMAIN/s: Mediator complex subunit Med28 (InterPro:IPR021640); BEST Arabidopsis thaliana protein match is: unknown protein (TAIR:AT3G01670.1); Has 122 Blast hits to 112 proteins in 13 species: Archae - 0; Bacteria - 0; Metazoa - 0; Fungi - 0; Plants - 122; Viruses - 0; Other Eukaryotes - 0 (source: NCBI BLink).|chr3:252033-255246 FORWARD LENGTH=740	0	NA	NA
Glyma.04G191200	-3.91712	3.88e-13	AT4G24790.2|Symbols:|AAA-type ATPase family protein|chr4:12778222-12781345 FORWARD LENGTH=857	0	GO:0006260	DNA replication
Glyma.04G193700	-1.04404	0.00290554	AT3G48500.1|Symbols:PDE312, PTAC10|Nucleic acid-binding, OB-fold-like protein|chr3:17962209-17965408 FORWARD LENGTH=668	0	GO:0042793 GO:0045893	positive regulation of transcription, DNA-dependent; transcription from plastid promoter
Glyma.04G197900	-1.08718	0.00124325	AT3G48710.1|Symbols:|DEK domain-containing chromatin associated protein|chr3:18041024-18043995 FORWARD LENGTH=462	8e-118	GO:0010048	vernalization response
Glyma.04G198300	-2.89928	0.00347063	NA	NA	NA	NA
Glyma.04G199900	1.73195	1.72e-09	AT5G50915.2|Symbols:|basic helix-loop-helix (bHLH) DNA-binding superfamily protein|chr5:20710764-20712252 REVERSE LENGTH=286	3e-60	GO:0009739	response to gibberellin stimulus
Glyma.04G202100	0.995254	0.00154361	AT1G01630.1|Symbols:|Sec14p-like phosphatidylinositol transfer family protein|chr1:229206-230675 FORWARD LENGTH=255	3e-111	GO:0006810 GO:0019344	cysteine biosynthetic process; transport
Glyma.04G202500	-0.970535	0.0024865	AT3G23760.1|Symbols:|FUNCTIONS IN: molecular_function unknown; INVOLVED IN: biological_process unknown; LOCATED IN: vacuole; EXPRESSED IN: 20 plant structures; EXPRESSED DURING: 13 growth stages; BEST Arabidopsis thaliana protein match is: transferases, transferring glycosyl groups (TAIR:AT4G14100.1); Has 108 Blast hits to 104 proteins in 19 species: Archae - 0; Bacteria - 0; Metazoa - 8; Fungi -…	1e-79	GO:0008150	biological process
Glyma.04G205000	-1.4138	0.000242257	AT2G40980.1|Symbols:|Protein kinase superfamily protein|chr2:17102090-17104443 FORWARD LENGTH=617	4e-164	NA	NA
Glyma.04G209200	-1.63437	6.61e-05	AT5G09220.1|Symbols:AAP2|amino acid permease 2|chr5:2866867-2868863 FORWARD LENGTH=493	0	GO:0006612 GO:0006833 GO:0006865 GO:0009651 GO:0009750 GO:0009963 GO:0010363 GO:0015800 GO:0015804 GO:0030003 GO:0070838	acidic amino acid transport; amino acid transport; cellular cation homeostasis; divalent metal ion transport; neutral amino acid transport; positive regulation of flavonoid biosynthetic process; protein targeting to membrane; regulation of plant-type hypersensitive response; response to fructose stimulus; response to salt stress; water transport
Glyma.04G210700	-1.82416	6.93e-07	AT5G63960.1|Symbols:EMB2780|DNA binding;nucleotide binding;nucleic acid binding;DNA-directed DNA polymerases;DNA-directed DNA polymerases|chr5:25599597-25606672 FORWARD LENGTH=1095	0	GO:0000724 GO:0000911 GO:0006139 GO:0006260 GO:0006261 GO:0006275 GO:0006287 GO:0006297 GO:0006302 GO:0006306 GO:0006310 GO:0006312 GO:0006342 GO:0006346 GO:0007062 GO:0007067 GO:0007126 GO:0007129 GO:0007131 GO:0007267 GO:0007346 GO:0008283 GO:0009616 GO:0009909 GO:0010267 GO:0010332 GO:0010389 GO:0010564 GO:0016246 GO:0016458 GO:0016570 GO:0031047 GO:0031048 GO:0032204 GO:0034968 GO:0035196 GO:…	DNA-dependent DNA replication; DNA methylation; DNA recombination; DNA replication; DNA replication, removal of RNA primer; DNA replication proofreading; RNA interference; base-excision repair, gap-filling; cell-cell signaling; cell proliferation; chromatin silencing; chromatin silencing by small RNA; cytokinesis by cell plate formation; double-strand break repair; double-strand break repair via …
Glyma.04G212000	4.72847	0.000111436	AT5G64530.1|Symbols:ANAC104, XND1|xylem NAC domain 1|chr5:25795360-25796699 FORWARD LENGTH=187	2e-56	GO:0006355 GO:0007275 GO:0010089 GO:0043067 GO:0048367	multicellular organismal development; regulation of programmed cell death; regulation of transcription, DNA-dependent; shoot system development; xylem development
Glyma.04G213800	-1.63513	1.2e-05	AT5G64580.1|Symbols:|AAA-type ATPase family protein|chr5:25817391-25821465 REVERSE LENGTH=855	0	GO:0006364 GO:0006399 GO:0006508 GO:0009658 GO:0009790 GO:0016556	chloroplast organization; embryo development; mRNA modification; proteolysis; rRNA processing; tRNA metabolic process
Glyma.04G217300	-3.28645	2.83e-13	AT2G21790.1|Symbols:R1, RNR1, CLS8, ATRNR1|ribonucleotide reductase 1|chr2:9293529-9297580 FORWARD LENGTH=816	0	GO:0006094 GO:0006260 GO:0006261 GO:0007010 GO:0009165 GO:0009202 GO:0010498 GO:0046686 GO:0055114	DNA-dependent DNA replication; DNA replication; cytoskeleton organization; deoxyribonucleoside triphosphate biosynthetic process; gluconeogenesis; nucleotide biosynthetic process; oxidation-reduction process; proteasomal protein catabolic process; response to cadmium ion
Glyma.04G219000	1.31858	0.00744072	AT5G09960.1|Symbols:|FUNCTIONS IN: molecular_function unknown; INVOLVED IN: biological_process unknown; LOCATED IN: plasma membrane; EXPRESSED IN: 22 plant structures; EXPRESSED DURING: 13 growth stages; CONTAINS InterPro DOMAIN/s: RPM1-interacting protein 4, defence response (InterPro:IPR008700); BEST Arabidopsis thaliana protein match is: unknown protein (TAIR:AT5G64850.1); Has 30201 Blast hits…	2e-30	GO:0006661 GO:0008150	biological process; phosphatidylinositol biosynthetic process
Glyma.04G222000	-1.42872	0.00487304	AT2G40550.1|Symbols:ETG1|E2F target gene 1|chr2:16934927-16938033 FORWARD LENGTH=589	0	GO:0000278 GO:0000724 GO:0006260 GO:0006261 GO:0006270 GO:0006275 GO:0006301 GO:0006306 GO:0007062 GO:0008283 GO:0009555 GO:0010090 GO:0016444 GO:0016568 GO:0031047 GO:0042023 GO:0051302 GO:0051567 GO:0051726	DNA-dependent DNA replication; DNA endoreduplication; DNA methylation; DNA replication; DNA replication initiation; cell proliferation; chromatin modification; double-strand break repair via homologous recombination; gene silencing by RNA; histone H3-K9 methylation; mitotic cell cycle; pollen development; postreplication repair; regulation of DNA replication; regulation of cell cycle; regulation …
Glyma.04G223000	-4.35557	0.00841816	AT3G56380.1|Symbols:ARR17, RR17|response regulator 17|chr3:20905480-20906368 FORWARD LENGTH=153	1e-62	GO:0000160 GO:0006355 GO:0009736	cytokinin mediated signaling pathway; phosphorelay signal transduction system; regulation of transcription, DNA-dependent
Glyma.04G223100	1.46014	0.00185461	NA	NA	NA	NA
Glyma.04G224000	-0.831902	0.00602325	AT1G26910.1|Symbols:RPL10B|Ribosomal protein L16p/L10e family protein|chr1:9321709-9322813 FORWARD LENGTH=221	2e-147	GO:0001510 GO:0006412 GO:0010224 GO:0032502	RNA methylation; developmental process; response to UV-B; translation
Glyma.04G227900	-2.14971	0.000764196	AT5G24530.1|Symbols:DMR6|2-oxoglutarate (2OG) and Fe(II)-dependent oxygenase superfamily protein|chr5:8378964-8383154 FORWARD LENGTH=341	0	GO:0000165 GO:0001666 GO:0006612 GO:0009595 GO:0009617 GO:0009620 GO:0009627 GO:0009697 GO:0009813 GO:0009862 GO:0009867 GO:0010200 GO:0010310 GO:0010363 GO:0031347 GO:0031348 GO:0034976 GO:0042742 GO:0043900 GO:0045087 GO:0050832 GO:0055114	MAPK cascade; defense response to bacterium; defense response to fungus; detection of biotic stimulus; flavonoid biosynthetic process; innate immune response; jasmonic acid mediated signaling pathway; negative regulation of defense response; oxidation-reduction process; protein targeting to membrane; regulation of defense response; regulation of hydrogen peroxide metabolic process; regulation of …
Glyma.04G228400	-1.09826	6.06e-05	AT5G24490.1|Symbols:|30S ribosomal protein, putative|chr5:8365690-8367178 FORWARD LENGTH=308	2e-123	GO:0006412 GO:0044238	primary metabolic process; translation
Glyma.04G229600	1.6866	0.000573748	AT2G46780.1|Symbols:|RNA-binding (RRM/RBD/RNP motifs) family protein|chr2:19229516-19231043 FORWARD LENGTH=336	2e-47	GO:0008150	biological process
Glyma.04G229900	0.880696	0.00801797	NA	NA	NA	NA
Glyma.04G232400	-1.0644	0.00789489	AT4G27700.1|Symbols:|Rhodanese/Cell cycle control phosphatase superfamily protein|chr4:13826541-13827673 REVERSE LENGTH=224	6e-104	GO:0000023 GO:0006098 GO:0007568 GO:0019252 GO:0043085	aging; maltose metabolic process; pentose-phosphate shunt; positive regulation of catalytic activity; starch biosynthetic process
Glyma.04G234000	-1.09056	0.00111057	AT5G24314.1|Symbols:PDE225, PTAC7|plastid transcriptionally active7|chr5:8277750-8279099 FORWARD LENGTH=161	3e-62	GO:0008150	biological process
Glyma.04G234300	-1.2813	1.02e-05	AT5G53080.1|Symbols:|Tetratricopeptide repeat (TPR)-like superfamily protein|chr5:21520624-21523158 FORWARD LENGTH=564	0	NA	NA
Glyma.04G238900	1.29063	0.00954068	AT5G53310.1|Symbols:|myosin heavy chain-related|chr5:21634657-21636094 FORWARD LENGTH=210	2e-67	GO:0006623 GO:0006944 GO:0010200 GO:0016192 GO:0048193	Golgi vesicle transport; cellular membrane fusion; protein targeting to vacuole; response to chitin; vesicle-mediated transport
Glyma.04G242300	-1.42034	6.6e-05	AT2G02850.1|Symbols:ARPN|plantacyanin|chr2:826630-827720 REVERSE LENGTH=129	1e-48	GO:0009640 GO:0009737 GO:0009793 GO:0009845 GO:0009856 GO:0009909 GO:0009933 GO:0010162 GO:0010182 GO:0010228 GO:0016567 GO:0019915 GO:0048653 GO:0050826	anther development; embryo development ending in seed dormancy; lipid storage; meristem structural organization; photomorphogenesis; pollination; protein ubiquitination; regulation of flower development; response to abscisic acid stimulus; response to freezing; seed dormancy process; seed germination; sugar mediated signaling pathway; vegetative to reproductive phase transition of meristem
Glyma.04G242700	0.823196	0.00690135	AT1G21410.1|Symbols:SKP2A|F-box/RNI-like superfamily protein|chr1:7497479-7499386 FORWARD LENGTH=360	5e-180	GO:0010311 GO:0016567 GO:0031146 GO:0045892 GO:0051781 GO:0071365	SCF-dependent proteasomal ubiquitin-dependent protein catabolic process; cellular response to auxin stimulus; lateral root formation; negative regulation of transcription, DNA-dependent; positive regulation of cell division; protein ubiquitination
Glyma.04G246600	-3.50476	3.11e-07	AT1G44110.1|Symbols:CYCA1;1|Cyclin A1;1|chr1:16775035-16777182 REVERSE LENGTH=460	0	GO:0000079 GO:0000911 GO:0006260 GO:0006270 GO:0006275 GO:0006306 GO:0008283 GO:0009909 GO:0010103 GO:0010389 GO:0010583 GO:0016458 GO:0016572 GO:0034968 GO:0042127 GO:0051567 GO:0051726	DNA methylation; DNA replication; DNA replication initiation; cell proliferation; cytokinesis by cell plate formation; gene silencing; histone H3-K9 methylation; histone lysine methylation; histone phosphorylation; regulation of DNA replication; regulation of G2/M transition of mitotic cell cycle; regulation of cell cycle; regulation of cell proliferation; regulation of cyclin-dependent protein s…
Glyma.04G246800	-1.8459	0.000743703	AT1G21690.1|Symbols:EMB1968, RFC4|ATPase family associated with various cellular activities (AAA)|chr1:7615675-7618362 FORWARD LENGTH=339	0	GO:0001510 GO:0006260 GO:0009220 GO:0009793 GO:0009909 GO:0016570 GO:0048449	DNA replication; RNA methylation; embryo development ending in seed dormancy; floral organ formation; histone modification; pyrimidine ribonucleotide biosynthetic process; regulation of flower development
Glyma.04G249600	-2.86636	2.22e-06	AT1G77580.1|Symbols:|Plant protein of unknown function (DUF869)|chr1:29144632-29146600 REVERSE LENGTH=629	3e-80	NA	NA
Glyma.04G250200	-2.1526	0.000298848	AT1G77620.1|Symbols:|P-loop containing nucleoside triphosphate hydrolases superfamily protein|chr1:29167934-29172867 REVERSE LENGTH=1151	0	GO:0006281	DNA repair
Glyma.04G252700	-3.63299	1.08e-10	AT1G77720.1|Symbols:PPK1|putative protein kinase 1|chr1:29210730-29213877 FORWARD LENGTH=777	0	GO:0000226 GO:0000911 GO:0006306 GO:0006342 GO:0006346 GO:0006468 GO:0007267 GO:0009616 GO:0009909 GO:0010267 GO:0016570 GO:0031047 GO:0031048 GO:0035196 GO:0046777 GO:0048449 GO:0051567	DNA methylation; cell-cell signaling; chromatin silencing; chromatin silencing by small RNA; cytokinesis by cell plate formation; floral organ formation; gene silencing by RNA; histone H3-K9 methylation; histone modification; methylation-dependent chromatin silencing; microtubule cytoskeleton organization; production of miRNAs involved in gene silencing by miRNA; production of ta-siRNAs involved …
Glyma.04G256800	-1.72424	6.41e-05	AT1G72040.1|Symbols:|P-loop containing nucleoside triphosphate hydrolases superfamily protein|chr1:27112159-27114248 REVERSE LENGTH=580	0	GO:0006139	nucleobase-containing compound metabolic process
Glyma.04G257300	0.919243	0.00320512	AT1G20720.1|Symbols:|RAD3-like DNA-binding helicase protein|chr1:7185658-7192794 REVERSE LENGTH=1175	6e-06	GO:0006139 GO:0006261	DNA-dependent DNA replication; nucleobase-containing compound metabolic process
Glyma.05G002600	-1.24936	0.000106921	AT3G27560.1|Symbols:ATN1|Protein kinase superfamily protein|chr3:10210597-10212507 REVERSE LENGTH=356	0	GO:0010053	root epidermal cell differentiation
Glyma.05G003900	1.53951	3.08e-05	AT5G40390.1|Symbols:SIP1|Raffinose synthase family protein|chr5:16161720-16165085 FORWARD LENGTH=783	0	GO:0005986 GO:0006979 GO:0009414 GO:0009737 GO:0010325 GO:0019593	mannitol biosynthetic process; raffinose family oligosaccharide biosynthetic process; response to abscisic acid stimulus; response to oxidative stress; response to water deprivation; sucrose biosynthetic process
Glyma.05G004600	-3.41067	0.000127685	AT3G27640.1|Symbols:|Transducin/WD40 repeat-like superfamily protein|chr3:10232307-10235467 FORWARD LENGTH=535	2e-172	GO:0006261 GO:0008150	DNA-dependent DNA replication; biological process
Glyma.05G009200	-1.99297	7.25e-05	AT2G26700.1|Symbols:PID2|AGC (cAMP-dependent, cGMP-dependent and protein kinase C) kinase family protein|chr2:11368613-11370951 FORWARD LENGTH=525	0	GO:0006468 GO:0048825	cotyledon development; protein phosphorylation
Glyma.05G010300	2.5717	0.00679901	AT5G20010.1|Symbols:RAN-1, RAN1, ATRAN1|RAS-related nuclear protein-1|chr5:6760364-6761747 FORWARD LENGTH=221	3e-151	GO:0006184 GO:0006606 GO:0006886 GO:0006913 GO:0007165 GO:0007264 GO:0009651 GO:0046686	GTP catabolic process; intracellular protein transport; nucleocytoplasmic transport; protein import into nucleus; response to cadmium ion; response to salt stress; signal transduction; small GTPase mediated signal transduction
Glyma.05G011700	-0.93347	0.0082731	AT2G26900.1|Symbols:|Sodium Bile acid symporter family|chr2:11475156-11477870 REVERSE LENGTH=409	0	GO:0000023 GO:0006814 GO:0006849 GO:0019252 GO:0019761 GO:0035725 GO:0043085	glucosinolate biosynthetic process; maltose metabolic process; plasma membrane pyruvate transport; positive regulation of catalytic activity; sodium ion transmembrane transport; sodium ion transport; starch biosynthetic process
Glyma.05G013500	-0.898654	0.00492336	AT1G03280.1|Symbols:|Transcription factor TFIIE, alpha subunit|chr1:803635-806758 FORWARD LENGTH=479	0	GO:0000394 GO:0000956 GO:0006366 GO:0006367 GO:0006487 GO:0007346 GO:0010048 GO:0048573	RNA splicing, via endonucleolytic cleavage and ligation; nuclear-transcribed mRNA catabolic process; photoperiodism, flowering; protein N-linked glycosylation; regulation of mitotic cell cycle; transcription from RNA polymerase II promoter; transcription initiation from RNA polymerase II promoter; vernalization response
Glyma.05G014900	-2.65541	3.65e-06	AT1G18550.1|Symbols:|ATP binding microtubule motor family protein|chr1:6381656-6384340 REVERSE LENGTH=725	0	GO:0007018	microtubule-based movement
Glyma.05G019400	-1.02465	0.000339307	AT5G39040.1|Symbols:ALS1, ATTAP2, TAP2|transporter associated with antigen processing protein 2|chr5:15625660-15629621 FORWARD LENGTH=644	0	GO:0006200 GO:0006810 GO:0010044 GO:0035672 GO:0055085	ATP catabolic process; oligopeptide transmembrane transport; response to aluminum ion; transmembrane transport; transport
Glyma.05G020600	-3.10996	1.51e-08	AT5G08020.1|Symbols:ATRPA70B, RPA70B|RPA70-kDa subunit B|chr5:2572107-2574879 FORWARD LENGTH=604	0	GO:0000278 GO:0000724 GO:0006260 GO:0006261 GO:0006270 GO:0006275 GO:0006281 GO:0006306 GO:0008283 GO:0009555 GO:0009909 GO:0010224 GO:0010389 GO:0016444 GO:0016458 GO:0016568 GO:0031047 GO:0034968 GO:0051567 GO:0051726	DNA-dependent DNA replication; DNA methylation; DNA repair; DNA replication; DNA replication initiation; cell proliferation; chromatin modification; double-strand break repair via homologous recombination; gene silencing; gene silencing by RNA; histone H3-K9 methylation; histone lysine methylation; mitotic cell cycle; pollen development; regulation of DNA replication; regulation of G2/M transitio…
Glyma.05G024400	-1.10935	0.00312275	AT1G18670.1|Symbols:IBS1|Protein kinase superfamily protein|chr1:6427242-6430696 REVERSE LENGTH=709	0	GO:0006468 GO:0006499	N-terminal protein myristoylation; protein phosphorylation
Glyma.05G025600	-6.87522	3.08e-05	AT1G69530.5|Symbols:EXPA1|expansin A1|chr1:26142034-26143200 FORWARD LENGTH=245	3e-53	GO:0006949 GO:0009664 GO:0009739 GO:0009826 GO:0009828 GO:0010114 GO:0010119	plant-type cell wall loosening; plant-type cell wall organization; regulation of stomatal movement; response to gibberellin stimulus; response to red light; syncytium formation; unidimensional cell growth
Glyma.05G026900	3.19289	2.76e-07	AT3G28917.1|Symbols:MIF2|mini zinc finger 2|chr3:10925014-10925316 FORWARD LENGTH=100	8e-29	GO:0008150	biological process
Glyma.05G028700	-3.27479	4.67e-06	AT5G62550.1|Symbols:|unknown protein; FUNCTIONS IN: molecular_function unknown; INVOLVED IN: biological_process unknown; LOCATED IN: plasma membrane; EXPRESSED IN: 17 plant structures; EXPRESSED DURING: 9 growth stages; Has 14949 Blast hits to 9947 proteins in 971 species: Archae - 43; Bacteria - 3248; Metazoa - 4424; Fungi - 1542; Plants - 562; Viruses - 55; Other Eukaryotes - 5075 (source: NCBI…	4e-39	GO:0008150	biological process
Glyma.05G033400	-2.98384	6.11e-06	AT3G48160.2|Symbols:DEL1, E2L3, E2FE|DP-E2F-like 1|chr3:17783641-17785846 FORWARD LENGTH=403	3e-121	GO:0006355 GO:0032876 GO:0042023	DNA endoreduplication; negative regulation of DNA endoreduplication; regulation of transcription, DNA-dependent
Glyma.05G033800	-2.53335	4.54e-05	AT5G50110.1|Symbols:|S-adenosyl-L-methionine-dependent methyltransferases superfamily protein|chr5:20373515-20376068 FORWARD LENGTH=292	4e-120	GO:0006364	rRNA processing
Glyma.05G034500	1.71542	0.00127803	AT5G14920.1|Symbols:|Gibberellin-regulated family protein|chr5:4826598-4827761 FORWARD LENGTH=275	4e-23	GO:0009651 GO:0009737 GO:0009739 GO:2000377	regulation of reactive oxygen species metabolic process; response to abscisic acid stimulus; response to gibberellin stimulus; response to salt stress
Glyma.05G037800	-1.20809	0.00110532	AT5G62940.1|Symbols:HCA2, DOF5.6|Dof-type zinc finger DNA-binding family protein|chr5:25257183-25258504 REVERSE LENGTH=372	5e-51	GO:0006355 GO:0010067 GO:0010087 GO:0045893	phloem or xylem histogenesis; positive regulation of transcription, DNA-dependent; procambium histogenesis; regulation of transcription, DNA-dependent
Glyma.05G039900	1.22429	0.00152086	AT5G48940.1|Symbols:|Leucine-rich repeat transmembrane protein kinase family protein|chr5:19839785-19843744 FORWARD LENGTH=1135	0	GO:0002237 GO:0006468 GO:0007165 GO:0007169 GO:0010103 GO:0048443	protein phosphorylation; response to molecule of bacterial origin; signal transduction; stamen development; stomatal complex morphogenesis; transmembrane receptor protein tyrosine kinase signaling pathway
Glyma.05G040000	-1.93331	0.00303773	AT3G48210.1|Symbols:|CONTAINS InterPro DOMAIN/s: Kinetochore-Ndc80 complex, subunit Spc25 (InterPro:IPR013255); Has 194 Blast hits to 194 proteins in 72 species: Archae - 0; Bacteria - 4; Metazoa - 72; Fungi - 39; Plants - 62; Viruses - 0; Other Eukaryotes - 17 (source: NCBI BLink).|chr3:17849435-17851396 FORWARD LENGTH=315	3e-66	GO:0000724 GO:0006302 GO:0006310 GO:0006312 GO:0007059 GO:0007062 GO:0007126 GO:0007129 GO:0007131 GO:0007140 GO:0008150 GO:0009560 GO:0010332 GO:0016444 GO:0032204 GO:0033044 GO:0042138 GO:0043247 GO:0045132	DNA recombination; biological process; chromosome segregation; double-strand break repair; double-strand break repair via homologous recombination; embryo sac egg cell differentiation; male meiosis; meiosis; meiotic DNA double-strand break formation; meiotic chromosome segregation; mitotic recombination; reciprocal meiotic recombination; regulation of chromosome organization; regulation of telome…
Glyma.05G041700	-0.923567	0.00538566	AT4G24700.1|Symbols:|unknown protein; Has 20 Blast hits to 20 proteins in 7 species: Archae - 0; Bacteria - 0; Metazoa - 0; Fungi - 0; Plants - 20; Viruses - 0; Other Eukaryotes - 0 (source: NCBI BLink).|chr4:12744807-12745238 REVERSE LENGTH=143	1e-18	GO:0008150	biological process
Glyma.05G044000	1.87256	0.00502261	AT5G63180.1|Symbols:|Pectin lyase-like superfamily protein|chr5:25341106-25343113 REVERSE LENGTH=432	0	GO:0008150	biological process
Glyma.05G046900	-1.06638	0.00885821	AT4G24830.1|Symbols:|arginosuccinate synthase family|chr4:12793085-12795857 REVERSE LENGTH=494	0	GO:0006526 GO:0006567 GO:0009165	arginine biosynthetic process; nucleotide biosynthetic process; threonine catabolic process
Glyma.05G048400	-2.64782	0.00739278	AT3G48540.1|Symbols:|Cytidine/deoxycytidylate deaminase family protein|chr3:17989798-17992015 REVERSE LENGTH=232	9e-127	NA	NA
Glyma.05G049300	-2.79115	3.27e-09	AT1G63100.1|Symbols:|GRAS family transcription factor|chr1:23399391-23401367 REVERSE LENGTH=658	0	GO:0000226 GO:0000911 GO:0006355 GO:0048451 GO:0048453	cytokinesis by cell plate formation; microtubule cytoskeleton organization; petal formation; regulation of transcription, DNA-dependent; sepal formation
Glyma.05G050100	1.6329	7.44e-05	AT1G12570.1|Symbols:|Glucose-methanol-choline (GMC) oxidoreductase family protein|chr1:4278192-4280753 REVERSE LENGTH=572	0	GO:0006066 GO:0055114	alcohol metabolic process; oxidation-reduction process
Glyma.05G050600	-1.32638	0.00225531	AT1G62990.1|Symbols:KNAT7, IXR11|KNOTTED-like homeobox of Arabidopsis thaliana 7|chr1:23337468-23340348 FORWARD LENGTH=291	6e-163	GO:0006355 GO:0007155 GO:0010089 GO:0010090 GO:0010413 GO:0044036 GO:0045010 GO:0045492 GO:0045892 GO:0048513 GO:0048765 GO:0071555 GO:2000652	actin nucleation; cell adhesion; cell wall macromolecule metabolic process; cell wall organization; glucuronoxylan metabolic process; negative regulation of transcription, DNA-dependent; organ development; regulation of secondary cell wall biogenesis; regulation of transcription, DNA-dependent; root hair cell differentiation; trichome morphogenesis; xylan biosynthetic process; xylem development
Glyma.05G052900	0.815265	0.000897097	AT1G62850.3|Symbols:|Class I peptide chain release factor|chr1:23272608-23274211 REVERSE LENGTH=236	8e-94	GO:0006415	translational termination
Glyma.05G053600	-1.00691	0.000256519	AT1G12410.1|Symbols:CLPR2, NCLPP2, CLP2|CLP protease proteolytic subunit 2|chr1:4223099-4224954 FORWARD LENGTH=279	2e-145	GO:0006364 GO:0006508 GO:0009658 GO:0009902 GO:0010027 GO:0010207 GO:0034660 GO:0035304 GO:0042793 GO:0045893	chloroplast organization; chloroplast relocation; ncRNA metabolic process; photosystem II assembly; positive regulation of transcription, DNA-dependent; proteolysis; rRNA processing; regulation of protein dephosphorylation; thylakoid membrane organization; transcription from plastid promoter
Glyma.05G055200	-6.99412	3.39e-09	AT5G62350.1|Symbols:|Plant invertase/pectin methylesterase inhibitor superfamily protein|chr5:25037504-25038112 FORWARD LENGTH=202	6e-50	GO:0006096 GO:0006833 GO:0006972 GO:0007030 GO:0009266 GO:0009651 GO:0046686	Golgi organization; glycolysis; hyperosmotic response; response to cadmium ion; response to salt stress; response to temperature stimulus; water transport
Glyma.05G055700	3.57651	0.000816137	AT1G62710.1|Symbols:BETA-VPE, BETAVPE|beta vacuolar processing enzyme|chr1:23224070-23226857 REVERSE LENGTH=486	0	GO:0006508 GO:0006624	proteolysis; vacuolar protein processing
Glyma.05G057500	1.96614	0.00248124	AT4G12510.1|Symbols:|Bifunctional inhibitor/lipid-transfer protein/seed storage 2S albumin superfamily protein|chr4:7417414-7417803 REVERSE LENGTH=129	5e-45	GO:0006869	lipid transport
Glyma.05G057800	2.30824	0.000116741	AT2G45180.1|Symbols:|Bifunctional inhibitor/lipid-transfer protein/seed storage 2S albumin superfamily protein|chr2:18626377-18626781 FORWARD LENGTH=134	4e-42	GO:0000038 GO:0006869 GO:0042335	cuticle development; lipid transport; very long-chain fatty acid metabolic process
Glyma.05G065900	-0.787488	0.00926978	AT4G17040.1|Symbols:CLPR4|CLP protease R subunit 4|chr4:9586740-9589297 REVERSE LENGTH=305	3e-155	GO:0000302 GO:0006508 GO:0009627 GO:0010468 GO:0019288 GO:0031347 GO:0032880	isopentenyl diphosphate biosynthetic process, mevalonate-independent pathway; proteolysis; regulation of defense response; regulation of gene expression; regulation of protein localization; response to reactive oxygen species; systemic acquired resistance
Glyma.05G068400	0.997674	0.00742849	AT1G32740.1|Symbols:|SBP (S-ribonuclease binding protein) family protein|chr1:11844883-11846082 FORWARD LENGTH=312	3e-75	GO:0008150	biological process
Glyma.05G072200	-2.77088	4.01e-07	AT3G27350.1|Symbols:|unknown protein; FUNCTIONS IN: molecular_function unknown; INVOLVED IN: biological_process unknown; LOCATED IN: plasma membrane; EXPRESSED IN: 24 plant structures; EXPRESSED DURING: 15 growth stages; BEST Arabidopsis thaliana protein match is: unknown protein (TAIR:AT5G40700.1); Has 230 Blast hits to 202 proteins in 35 species: Archae - 0; Bacteria - 3; Metazoa - 77; Fungi - …	2e-33	GO:0008150	biological process
Glyma.05G075800	-1.18039	0.000183453	AT5G14210.1|Symbols:|Leucine-rich repeat protein kinase family protein|chr5:4578503-4581374 REVERSE LENGTH=775	0	GO:0006468 GO:0007169	protein phosphorylation; transmembrane receptor protein tyrosine kinase signaling pathway
Glyma.05G076800	1.26535	0.000120223	AT4G20010.1|Symbols:PTAC9, OSB2|plastid transcriptionally active 9|chr4:10842128-10843989 FORWARD LENGTH=371	8e-36	GO:0008150	biological process
Glyma.05G086400	1.31295	0.00563672	AT4G31590.1|Symbols:ATCSLC05, CSLC05, ATCSLC5, CSLC5|Cellulose-synthase-like C5|chr4:15309889-15312336 REVERSE LENGTH=692	2e-107	GO:0042546	cell wall biogenesis
Glyma.05G090600	1.00046	0.000623706	AT3G50560.1|Symbols:|NAD(P)-binding Rossmann-fold superfamily protein|chr3:18761247-18763835 REVERSE LENGTH=272	1e-120	GO:0008152	metabolic process
Glyma.05G096800	-2.35075	1.03e-05	AT1G47128.1|Symbols:RD21, RD21A|Granulin repeat cysteine protease family protein|chr1:17283139-17285609 REVERSE LENGTH=462	1e-157	GO:0006096 GO:0006508 GO:0006833 GO:0006972 GO:0007030 GO:0009266 GO:0009414 GO:0009651 GO:0015996 GO:0042744 GO:0046686 GO:0050832	Golgi organization; chlorophyll catabolic process; defense response to fungus; glycolysis; hydrogen peroxide catabolic process; hyperosmotic response; proteolysis; response to cadmium ion; response to salt stress; response to temperature stimulus; response to water deprivation; water transport
Glyma.05G098700	-1.79991	0.00866109	AT3G03680.1|Symbols:|C2 calcium/lipid-binding plant phosphoribosyltransferase family protein|chr3:907624-910677 FORWARD LENGTH=1017	0	GO:0008150	biological process
Glyma.05G099000	-1.46617	0.00227089	AT4G37280.1|Symbols:|MRG family protein|chr4:17546748-17549362 REVERSE LENGTH=320	2e-161	NA	NA
Glyma.05G100900	1.60965	0.00317983	AT1G24625.1|Symbols:ZFP7|zinc finger protein 7|chr1:8726009-8726638 REVERSE LENGTH=209	2e-19	GO:0006355	regulation of transcription, DNA-dependent
Glyma.05G102100	1.00417	0.000466939	AT4G37450.1|Symbols:AGP18, ATAGP18|arabinogalactan protein _x0001_18|chr4:17605926-17606734 REVERSE LENGTH=209	3e-14	NA	NA
Glyma.05G103600	1.73063	0.00460847	AT5G67400.1|Symbols:RHS19|root hair specific 19|chr5:26894896-26896300 FORWARD LENGTH=329	6e-160	GO:0006979 GO:0010054 GO:0055114	oxidation-reduction process; response to oxidative stress; trichoblast differentiation
Glyma.05G105400	-1.57396	0.0017985	NA	NA	NA	NA
Glyma.05G113300	-1.54072	1.22e-05	AT5G46580.1|Symbols:|pentatricopeptide (PPR) repeat-containing protein|chr5:18897510-18899645 REVERSE LENGTH=711	0	GO:0008150 GO:0009073 GO:0009793 GO:0010103 GO:0016226 GO:0045036	aromatic amino acid family biosynthetic process; biological process; embryo development ending in seed dormancy; iron-sulfur cluster assembly; protein targeting to chloroplast; stomatal complex morphogenesis
Glyma.05G120700	-0.897905	0.00720769	AT4G14320.1|Symbols:|Zinc-binding ribosomal protein family protein|chr4:8242684-8243805 REVERSE LENGTH=105	6e-65	GO:0006412	translation
Glyma.05G129700	-2.68283	1.14e-06	AT5G46280.1|Symbols:MCM3|Minichromosome maintenance (MCM2/3/5) family protein|chr5:18769902-18773606 REVERSE LENGTH=776	0	GO:0000911 GO:0006260 GO:0006268 GO:0006270 GO:0006275 GO:0006306 GO:0008283 GO:0009909 GO:0016458 GO:0034968 GO:0051567 GO:0051726	DNA methylation; DNA replication; DNA replication initiation; DNA unwinding involved in replication; cell proliferation; cytokinesis by cell plate formation; gene silencing; histone H3-K9 methylation; histone lysine methylation; regulation of DNA replication; regulation of cell cycle; regulation of flower development
Glyma.05G134800	-3.96021	0.00153266	AT4G20140.1|Symbols:GSO1|Leucine-rich repeat transmembrane protein kinase|chr4:10884220-10888045 FORWARD LENGTH=1249	0	GO:0006468 GO:0007169 GO:0008544 GO:0009790	embryo development; epidermis development; protein phosphorylation; transmembrane receptor protein tyrosine kinase signaling pathway
Glyma.05G137500	1.45827	0.000419703	AT1G17020.1|Symbols:SRG1, ATSRG1|senescence-related gene 1|chr1:5820258-5821741 FORWARD LENGTH=358	1e-139	GO:0009737 GO:0009793 GO:0009813 GO:0009830 GO:0009845 GO:0010162 GO:0010260 GO:0055114	cell wall modification involved in abscission; embryo development ending in seed dormancy; flavonoid biosynthetic process; organ senescence; oxidation-reduction process; response to abscisic acid stimulus; seed dormancy process; seed germination
Glyma.05G138700	1.26942	0.00434474	AT1G14720.1|Symbols:XTR2, EXGT-A2, ATXTH28, XTH28|xyloglucan endotransglucosylase/hydrolase 28|chr1:5066806-5068466 REVERSE LENGTH=332	7e-164	GO:0005975 GO:0006073 GO:0010154 GO:0080086	carbohydrate metabolic process; cellular glucan metabolic process; fruit development; stamen filament development
Glyma.05G139600	1.31723	0.000192696	AT1G70750.1|Symbols:|Protein of unknown function, DUF593|chr1:26680728-26683147 REVERSE LENGTH=749	7e-106	GO:0008150	biological process
Glyma.05G142000	-1.17841	2.04e-05	AT4G18390.2|Symbols:TCP2|TEOSINTE BRANCHED 1, cycloidea and PCF transcription factor 2|chr4:10163212-10164309 REVERSE LENGTH=365	4e-75	GO:0006355 GO:0006417 GO:0009657 GO:0009965 GO:0030154 GO:0045893 GO:0045962 GO:0048366	cell differentiation; leaf development; leaf morphogenesis; plastid organization; positive regulation of development, heterochronic; positive regulation of transcription, DNA-dependent; regulation of transcription, DNA-dependent; regulation of translation
Glyma.05G148900	-1.75564	0.00355385	AT1G67320.2|Symbols:|DNA primase, large subunit family|chr1:25205520-25208966 REVERSE LENGTH=454	0	GO:0006260 GO:0006261 GO:0006269 GO:0006270 GO:0006275 GO:0006306 GO:0008283 GO:0051567 GO:0051726	DNA-dependent DNA replication; DNA methylation; DNA replication; DNA replication, synthesis of RNA primer; DNA replication initiation; cell proliferation; histone H3-K9 methylation; regulation of DNA replication; regulation of cell cycle
Glyma.05G149700	1.29385	0.000701241	AT4G14150.1|Symbols:PAKRP1, KINESIN-12A|phragmoplast-associated kinesin-related protein 1|chr4:8158645-8165008 REVERSE LENGTH=1292	0	GO:0000226 GO:0000280 GO:0000911 GO:0000914 GO:0006260 GO:0006270 GO:0006275 GO:0006306 GO:0006346 GO:0008283 GO:0010389 GO:0031048 GO:0042023 GO:0051225 GO:0051567 GO:0051726 GO:0055046 GO:0080175	DNA endoreduplication; DNA methylation; DNA replication; DNA replication initiation; cell proliferation; chromatin silencing by small RNA; cytokinesis by cell plate formation; histone H3-K9 methylation; methylation-dependent chromatin silencing; microgametogenesis; microtubule cytoskeleton organization; nuclear division; phragmoplast assembly; phragmoplast microtubule organization; regulation of …
Glyma.05G150500	-2.42899	2.4e-07	AT3G23740.1|Symbols:|unknown protein; FUNCTIONS IN: molecular_function unknown; INVOLVED IN: biological_process unknown; LOCATED IN: chloroplast; EXPRESSED IN: 9 plant structures; EXPRESSED DURING: C globular stage, F mature embryo stage, petal differentiation and expansion stage, E expanded cotyledon stage, D bilateral stage; BEST Arabidopsis thaliana protein match is: unknown protein (TAIR:AT4G…	2e-34	GO:0006260 GO:0006270 GO:0006275 GO:0006306 GO:0008150 GO:0008283 GO:0051567 GO:0051726	DNA methylation; DNA replication; DNA replication initiation; biological process; cell proliferation; histone H3-K9 methylation; regulation of DNA replication; regulation of cell cycle
Glyma.05G152300	1.54846	0.00220381	AT3G23820.1|Symbols:GAE6|UDP-D-glucuronate 4-epimerase 6|chr3:8603645-8605027 FORWARD LENGTH=460	0	GO:0005975 GO:0006569 GO:0009225 GO:0009684 GO:0044237	carbohydrate metabolic process; cellular metabolic process; indoleacetic acid biosynthetic process; nucleotide-sugar metabolic process; tryptophan catabolic process
Glyma.05G154600	1.35301	7.26e-05	AT2G44300.1|Symbols:|Bifunctional inhibitor/lipid-transfer protein/seed storage 2S albumin superfamily protein|chr2:18307468-18308286 REVERSE LENGTH=204	5e-47	GO:0006869	lipid transport
Glyma.05G156000	1.04844	0.0015879	AT3G13560.2|Symbols:|O-Glycosyl hydrolases family 17 protein|chr3:4425484-4427284 REVERSE LENGTH=505	0	GO:0005975	carbohydrate metabolic process
Glyma.05G157500	-1.75817	0.0017585	AT5G44230.1|Symbols:|Pentatricopeptide repeat (PPR) superfamily protein|chr5:17814336-17816309 FORWARD LENGTH=657	0	NA	NA
Glyma.05G160900	1.54364	2.24e-05	NA	NA	NA	NA
Glyma.05G163400	1.4621	0.0028247	AT5G45670.1|Symbols:|GDSL-like Lipase/Acylhydrolase superfamily protein|chr5:18528600-18530164 FORWARD LENGTH=362	0	GO:0006629	lipid metabolic process
Glyma.05G164200	-1.54529	0.00363414	NA	NA	NA	NA
Glyma.05G165700	0.778864	0.00658249	NA	NA	NA	NA
Glyma.05G169000	-2.71697	2.15e-05	AT1G61000.1|Symbols:|FUNCTIONS IN: molecular_function unknown; INVOLVED IN: mitosis; LOCATED IN: plasma membrane; EXPRESSED IN: cultured cell; CONTAINS InterPro DOMAIN/s: Kinetochore protein Nuf2 (InterPro:IPR005549); Has 50972 Blast hits to 29793 proteins in 2070 species: Archae - 902; Bacteria - 7404; Metazoa - 23628; Fungi - 4156; Plants - 2312; Viruses - 158; Other Eukaryotes - 12412 (source:…	6e-135	GO:0007067	mitosis
Glyma.05G169400	0.87706	0.00142948	AT1G10900.1|Symbols:|Phosphatidylinositol-4-phosphate 5-kinase family protein|chr1:3632396-3636416 REVERSE LENGTH=754	0	GO:0046488	phosphatidylinositol metabolic process
Glyma.05G169600	-3.01462	4.28e-05	AT1G10780.1|Symbols:|F-box/RNI-like superfamily protein|chr1:3592875-3594310 REVERSE LENGTH=418	0	GO:0006270 GO:0006275 GO:0008150 GO:0008283 GO:0010389 GO:0016572 GO:0051726	DNA replication initiation; biological process; cell proliferation; histone phosphorylation; regulation of DNA replication; regulation of G2/M transition of mitotic cell cycle; regulation of cell cycle
Glyma.05G173700	-2.3417	0.00528564	AT3G26350.1|Symbols:|LOCATED IN: chloroplast; EXPRESSED IN: root, pedicel, carpel, stamen; EXPRESSED DURING: 4 anthesis, petal differentiation and expansion stage; CONTAINS InterPro DOMAIN/s: Late embryogenesis abundant protein, group 2 (InterPro:IPR004864); BEST Arabidopsis thaliana protein match is: unknown protein (TAIR:AT1G13050.1); Has 3534 Blast hits to 2704 proteins in 342 species: Archae …	4e-63	NA	NA
Glyma.05G176300	1.03515	0.00263244	AT5G65270.1|Symbols:AtRABA4a, RABA4a|RAB GTPase homolog A4A|chr5:26083437-26084550 FORWARD LENGTH=226	2e-138	GO:0007264 GO:0015031	protein transport; small GTPase mediated signal transduction
Glyma.05G179100	0.91899	0.000930618	AT4G39840.1|Symbols:|unknown protein; FUNCTIONS IN: molecular_function unknown; INVOLVED IN: biological_process unknown; LOCATED IN: endomembrane system; EXPRESSED IN: 23 plant structures; EXPRESSED DURING: 13 growth stages; Has 20719 Blast hits to 6096 proteins in 607 species: Archae - 22; Bacteria - 3243; Metazoa - 4364; Fungi - 2270; Plants - 237; Viruses - 128; Other Eukaryotes - 10455 (sourc…	1e-122	GO:0008150	biological process
Glyma.05G179900	2.04324	0.005204	AT4G39780.1|Symbols:|Integrase-type DNA-binding superfamily protein|chr4:18458216-18459034 REVERSE LENGTH=272	1e-78	GO:0006355	regulation of transcription, DNA-dependent
Glyma.05G182100	-1.68015	0.00173568	AT5G65207.1|Symbols:|unknown protein; BEST Arabidopsis thaliana protein match is: unknown protein (TAIR:AT5G10040.1); Has 30201 Blast hits to 17322 proteins in 780 species: Archae - 12; Bacteria - 1396; Metazoa - 17338; Fungi - 3422; Plants - 5037; Viruses - 0; Other Eukaryotes - 2996 (source: NCBI BLink).|chr5:26052364-26052585 REVERSE LENGTH=73	9e-08	GO:0008150	biological process
Glyma.05G186900	-2.05972	2.72e-06	AT2G21790.1|Symbols:R1, RNR1, CLS8, ATRNR1|ribonucleotide reductase 1|chr2:9293529-9297580 FORWARD LENGTH=816	0	GO:0006094 GO:0006260 GO:0006261 GO:0007010 GO:0009165 GO:0009202 GO:0010498 GO:0046686 GO:0055114	DNA-dependent DNA replication; DNA replication; cytoskeleton organization; deoxyribonucleoside triphosphate biosynthetic process; gluconeogenesis; nucleotide biosynthetic process; oxidation-reduction process; proteasomal protein catabolic process; response to cadmium ion
Glyma.05G187400	0.916744	0.000269685	AT5G64730.1|Symbols:|Transducin/WD40 repeat-like superfamily protein|chr5:25873146-25875021 FORWARD LENGTH=299	0	NA	NA
Glyma.05G188000	1.40538	0.00230327	NA	NA	NA	NA
Glyma.05G188600	-3.34526	1.15e-06	AT5G65360.1|Symbols:|Histone superfamily protein|chr5:26120099-26120509 REVERSE LENGTH=136	5e-94	GO:0006334	nucleosome assembly
Glyma.05G188700	-3.48107	7.46e-07	AT5G65360.1|Symbols:|Histone superfamily protein|chr5:26120099-26120509 REVERSE LENGTH=136	5e-94	GO:0006334	nucleosome assembly
Glyma.05G189400	-2.22738	1.24e-05	AT3G18730.1|Symbols:TSK, MGO3, BRU1|tetratricopeptide repeat (TPR)-containing protein|chr3:6446062-6453045 REVERSE LENGTH=1311	0	GO:0000086 GO:0009933 GO:0009934 GO:0051301	G2/M transition of mitotic cell cycle; cell division; meristem structural organization; regulation of meristem structural organization
Glyma.05G189900	-1.29818	0.00220798	AT3G18680.1|Symbols:|Amino acid kinase family protein|chr3:6427533-6429520 FORWARD LENGTH=339	9e-168	GO:0006221 GO:0006364 GO:0006399 GO:0008652 GO:0009073 GO:0009658 GO:0009793 GO:0010027 GO:0010228 GO:0016226 GO:0045036 GO:0045893 GO:0048481	aromatic amino acid family biosynthetic process; cellular amino acid biosynthetic process; chloroplast organization; embryo development ending in seed dormancy; iron-sulfur cluster assembly; ovule development; positive regulation of transcription, DNA-dependent; protein targeting to chloroplast; pyrimidine nucleotide biosynthetic process; rRNA processing; tRNA metabolic process; thylakoid membran…
Glyma.05G190200	-1.22663	0.00240903	AT3G18660.2|Symbols:PGSIP1, GUX1|plant glycogenin-like starch initiation protein 1|chr3:6419211-6421959 REVERSE LENGTH=659	0	GO:0005982 GO:0009058 GO:0009834 GO:0010413 GO:0010417 GO:0045492	biosynthetic process; glucuronoxylan biosynthetic process; glucuronoxylan metabolic process; secondary cell wall biogenesis; starch metabolic process; xylan biosynthetic process
Glyma.05G190800	-2.12103	0.00538566	AT5G64630.2|Symbols:FAS2, NFB01, NFB1, MUB3.9|Transducin/WD40 repeat-like superfamily protein|chr5:25833298-25836158 FORWARD LENGTH=487	0	GO:0000724 GO:0006310 GO:0006334 GO:0008283 GO:0009555 GO:0009933 GO:0010026 GO:0031507 GO:0048366	DNA recombination; cell proliferation; double-strand break repair via homologous recombination; heterochromatin assembly; leaf development; meristem structural organization; nucleosome assembly; pollen development; trichome differentiation
Glyma.05G196400	1.78792	0.000492904	AT5G63710.1|Symbols:|Leucine-rich repeat protein kinase family protein|chr5:25499475-25502598 FORWARD LENGTH=614	0	GO:0006468 GO:0006612 GO:0007169 GO:0009963 GO:0010363	positive regulation of flavonoid biosynthetic process; protein phosphorylation; protein targeting to membrane; regulation of plant-type hypersensitive response; transmembrane receptor protein tyrosine kinase signaling pathway
Glyma.05G199800	-1.14098	0.00109036	AT5G13420.1|Symbols:|Aldolase-type TIM barrel family protein|chr5:4302080-4304212 REVERSE LENGTH=438	4e-179	GO:0006096 GO:0009060 GO:0009809 GO:0033587 GO:0046686	aerobic respiration; glycolysis; lignin biosynthetic process; response to cadmium ion; shikimate biosynthetic process
Glyma.05G200000	3.27479	2.16e-07	AT1G01630.1|Symbols:|Sec14p-like phosphatidylinositol transfer family protein|chr1:229206-230675 FORWARD LENGTH=255	1e-101	GO:0006810 GO:0019344	cysteine biosynthetic process; transport
Glyma.05G201100	-0.931243	0.00169456	AT5G50920.1|Symbols:CLPC, ATHSP93-V, HSP93-V, DCA1, CLPC1|CLPC homologue 1|chr5:20715710-20719800 REVERSE LENGTH=929	0	GO:0006289 GO:0009658 GO:0009902 GO:0010027 GO:0010304 GO:0010380 GO:0019538 GO:0034660 GO:0042744 GO:0042793 GO:0045036 GO:0045037	PSII associated light-harvesting complex II catabolic process; chloroplast organization; chloroplast relocation; hydrogen peroxide catabolic process; ncRNA metabolic process; nucleotide-excision repair; protein import into chloroplast stroma; protein metabolic process; protein targeting to chloroplast; regulation of chlorophyll biosynthetic process; thylakoid membrane organization; transcription …
Glyma.05G202000	1.10142	5.44e-05	AT5G50860.1|Symbols:|Protein kinase superfamily protein|chr5:20693778-20696983 REVERSE LENGTH=580	0	GO:0006468 GO:0006499 GO:0046777	N-terminal protein myristoylation; protein autophosphorylation; protein phosphorylation
Glyma.05G202700	1.44758	0.000419703	AT5G50800.1|Symbols:SWEET13, AtSWEET13|Nodulin MtN3 family protein|chr5:20665280-20667140 REVERSE LENGTH=294	2e-95	GO:0015770	sucrose transport
Glyma.05G203100	-3.43624	1.22e-10	AT3G48710.1|Symbols:|DEK domain-containing chromatin associated protein|chr3:18041024-18043995 FORWARD LENGTH=462	8e-112	GO:0010048	vernalization response
Glyma.05G204500	-1.57766	0.00734506	AT5G50530.1|Symbols:|CBS / octicosapeptide/Phox/Bemp1 (PB1) domains-containing protein|chr5:20571876-20574922 REVERSE LENGTH=548	0	NA	NA
Glyma.05G205700	-1.11288	0.00042528	AT1G12800.1|Symbols:|Nucleic acid-binding, OB-fold-like protein|chr1:4361778-4365189 REVERSE LENGTH=767	0	GO:0006098 GO:0006655 GO:0009073 GO:0009902 GO:0010027 GO:0015995 GO:0016117 GO:0019252 GO:0019288 GO:0019344 GO:0034660 GO:0042793	aromatic amino acid family biosynthetic process; carotenoid biosynthetic process; chlorophyll biosynthetic process; chloroplast relocation; cysteine biosynthetic process; isopentenyl diphosphate biosynthetic process, mevalonate-independent pathway; ncRNA metabolic process; pentose-phosphate shunt; phosphatidylglycerol biosynthetic process; starch biosynthetic process; thylakoid membrane organizat…
Glyma.05G207500	1.6844	1.09e-05	AT5G12250.1|Symbols:TUB6|beta-6 tubulin|chr5:3961317-3962971 REVERSE LENGTH=449	0	GO:0000271 GO:0006084 GO:0006094 GO:0006096 GO:0006184 GO:0006833 GO:0006972 GO:0007010 GO:0007017 GO:0007018 GO:0007030 GO:0009266 GO:0009409 GO:0009651 GO:0009740 GO:0009825 GO:0009932 GO:0010162 GO:0010498 GO:0010817 GO:0016126 GO:0016132 GO:0019344 GO:0043481 GO:0046686 GO:0048767 GO:0051258 GO:0071555	GTP catabolic process; Golgi organization; acetyl-CoA metabolic process; anthocyanin accumulation in tissues in response to UV light; brassinosteroid biosynthetic process; cell tip growth; cell wall organization; cysteine biosynthetic process; cytoskeleton organization; gibberellic acid mediated signaling pathway; gluconeogenesis; glycolysis; hyperosmotic response; microtubule-based movement; mic…
Glyma.05G208500	1.1478	4.58e-05	AT2G45900.1|Symbols:|Phosphatidylinositol N-acetyglucosaminlytransferase subunit P-related|chr2:18886069-18888674 REVERSE LENGTH=720	5e-15	GO:0009739	response to gibberellin stimulus
Glyma.05G208800	0.912044	0.000584534	AT4G11410.1|Symbols:|NAD(P)-binding Rossmann-fold superfamily protein|chr4:6945127-6947186 REVERSE LENGTH=317	2e-172	GO:0008152	metabolic process
Glyma.05G213600	-1.05437	0.000308684	NA	NA	NA	NA
Glyma.05G214300	-0.933032	0.00343215	AT4G23740.1|Symbols:|Leucine-rich repeat protein kinase family protein|chr4:12367063-12369159 FORWARD LENGTH=638	0	GO:0006468 GO:0007169 GO:0010075	protein phosphorylation; regulation of meristem growth; transmembrane receptor protein tyrosine kinase signaling pathway
Glyma.05G215100	1.25672	0.000233478	AT5G41790.1|Symbols:CIP1|COP1-interactive protein 1|chr5:16727530-16732391 FORWARD LENGTH=1586	2e-73	GO:0042306	regulation of protein import into nucleus
Glyma.05G215500	-3.03112	0.000607838	AT4G11080.1|Symbols:|HMG (high mobility group) box protein|chr4:6760898-6763272 REVERSE LENGTH=446	1e-162	NA	NA
Glyma.05G216000	2.78978	5.04e-09	NA	NA	NA	NA
Glyma.05G216300	1.51262	0.00959991	AT2G19170.1|Symbols:SLP3|subtilisin-like serine protease 3|chr2:8314154-8317620 REVERSE LENGTH=815	4e-08	GO:0006508 GO:0008152 GO:0043086	metabolic process; negative regulation of catalytic activity; proteolysis
Glyma.05G216900	3.53118	0.000198232	AT4G23880.1|Symbols:|unknown protein; Has 73 Blast hits to 69 proteins in 22 species: Archae - 0; Bacteria - 4; Metazoa - 9; Fungi - 2; Plants - 18; Viruses - 0; Other Eukaryotes - 40 (source: NCBI BLink).|chr4:12415789-12416388 REVERSE LENGTH=199	7e-09	GO:0008150	biological process
Glyma.05G217100	-1.24397	0.00576604	AT4G10960.1|Symbols:UGE5|UDP-D-glucose/UDP-D-galactose 4-epimerase 5|chr4:6716083-6718472 REVERSE LENGTH=351	0	GO:0005975 GO:0006012 GO:0044237	carbohydrate metabolic process; cellular metabolic process; galactose metabolic process
Glyma.05G218500	1.09229	0.000252387	AT5G42050.1|Symbols:|DCD (Development and Cell Death) domain protein|chr5:16815630-16816932 FORWARD LENGTH=349	4e-108	GO:0000165 GO:0006499 GO:0006612 GO:0007154 GO:0009409 GO:0009738 GO:0009862 GO:0009867 GO:0010363 GO:0030968 GO:0031348 GO:0043069 GO:0050832	MAPK cascade; N-terminal protein myristoylation; abscisic acid mediated signaling pathway; cell communication; defense response to fungus; endoplasmic reticulum unfolded protein response; jasmonic acid mediated signaling pathway; negative regulation of defense response; negative regulation of programmed cell death; protein targeting to membrane; regulation of plant-type hypersensitive response; r…
Glyma.05G223400	-4.0622	1.27e-05	AT4G26220.1|Symbols:|S-adenosyl-L-methionine-dependent methyltransferases superfamily protein|chr4:13284179-13285146 FORWARD LENGTH=232	2e-105	NA	NA
Glyma.05G228800	-2.2466	2.27e-07	AT5G19570.1|Symbols:|unknown protein; CONTAINS InterPro DOMAIN/s: Uncharacterised protein family UPF0546 (InterPro:IPR018908); Has 1807 Blast hits to 1807 proteins in 277 species: Archae - 0; Bacteria - 0; Metazoa - 736; Fungi - 347; Plants - 385; Viruses - 0; Other Eukaryotes - 339 (source: NCBI BLink).|chr5:6606739-6607152 FORWARD LENGTH=137	3e-38	GO:0008150	biological process
Glyma.05G230100	-1.74292	0.000129196	AT2G32230.1|Symbols:PRORP1|proteinaceous RNase P 1|chr2:13679608-13681756 REVERSE LENGTH=572	4e-55	GO:0006855 GO:0008033 GO:0055085	drug transmembrane transport; tRNA processing; transmembrane transport
Glyma.05G230200	2.33985	0.00224645	AT2G46225.1|Symbols:ABIL1|ABI-1-like 1|chr2:18982113-18984074 FORWARD LENGTH=298	1e-24	GO:0010090 GO:0045010	actin nucleation; trichome morphogenesis
Glyma.05G231700	-1.19971	0.00808556	AT3G22440.1|Symbols:|FRIGIDA-like protein|chr3:7959854-7961886 FORWARD LENGTH=532	2e-75	GO:0000956 GO:0006635 GO:0008150 GO:0016558	biological process; fatty acid beta-oxidation; nuclear-transcribed mRNA catabolic process; protein import into peroxisome matrix
Glyma.05G232200	-0.811462	0.0064465	AT4G13350.2|Symbols:NIG|NSP (nuclear shuttle protein)-interacting GTPase|chr4:7770170-7773321 REVERSE LENGTH=602	2e-163	GO:0006913 GO:0009615 GO:0032312	nucleocytoplasmic transport; regulation of ARF GTPase activity; response to virus
Glyma.05G236200	-0.894027	0.00605164	AT1G14870.1|Symbols:PCR2|PLANT CADMIUM RESISTANCE 2|chr1:5128591-5129458 REVERSE LENGTH=152	2e-56	GO:0006979	response to oxidative stress
Glyma.05G236300	1.4873	0.0051788	AT1G14870.1|Symbols:PCR2|PLANT CADMIUM RESISTANCE 2|chr1:5128591-5129458 REVERSE LENGTH=152	3e-61	GO:0006979	response to oxidative stress
Glyma.05G236400	-2.10893	3.67e-07	AT1G70710.1|Symbols:ATGH9B1, CEL1, GH9B1|glycosyl hydrolase 9B1|chr1:26659356-26662962 REVERSE LENGTH=492	0	GO:0005975 GO:0009664 GO:0010583 GO:0042545 GO:0042547	carbohydrate metabolic process; cell wall modification; cell wall modification involved in multidimensional cell growth; plant-type cell wall organization; response to cyclopentenone
Glyma.05G240000	-0.800278	0.00669998	AT1G48520.1|Symbols:GATB|GLU-ADT subunit B|chr1:17940185-17942540 FORWARD LENGTH=550	0	GO:0006424 GO:0016556	glutamyl-tRNA aminoacylation; mRNA modification
Glyma.05G241700	-1.28076	0.000405549	AT1G12330.1|Symbols:|unknown protein; INVOLVED IN: biological_process unknown; LOCATED IN: chloroplast; EXPRESSED IN: 21 plant structures; EXPRESSED DURING: 12 growth stages; BEST Arabidopsis thaliana protein match is: unknown protein (TAIR:AT5G12900.1); Has 249 Blast hits to 249 proteins in 27 species: Archae - 0; Bacteria - 0; Metazoa - 7; Fungi - 14; Plants - 217; Viruses - 0; Other Eukaryotes…	8e-160	GO:0008150	biological process
Glyma.05G242600	1.30578	0.00523635	AT1G45688.1|Symbols:|unknown protein; FUNCTIONS IN: molecular_function unknown; INVOLVED IN: biological_process unknown; LOCATED IN: plasma membrane; EXPRESSED IN: 22 plant structures; EXPRESSED DURING: 13 growth stages; BEST Arabidopsis thaliana protein match is: unknown protein (TAIR:AT5G42860.1); Has 258 Blast hits to 242 proteins in 39 species: Archae - 0; Bacteria - 11; Metazoa - 10; Fungi -…	1e-115	GO:0008150 GO:0048767	biological process; root hair elongation
Glyma.05G245200	-0.882944	0.00256607	AT1G18170.1|Symbols:|FKBP-like peptidyl-prolyl cis-trans isomerase family protein|chr1:6254291-6255507 FORWARD LENGTH=247	4e-91	GO:0000413 GO:0006457 GO:0018208	peptidyl-proline modification; protein folding; protein peptidyl-prolyl isomerization
Glyma.05G248200	-1.22337	0.00697985	AT4G24660.1|Symbols:ATHB22, MEE68, HB22, ZHD2|homeobox protein 22|chr4:12724851-12725513 REVERSE LENGTH=220	1e-38	GO:0009686 GO:0009737 GO:0009740 GO:0009793 GO:0009845 GO:0010162 GO:0048608	embryo development ending in seed dormancy; gibberellic acid mediated signaling pathway; gibberellin biosynthetic process; reproductive structure development; response to abscisic acid stimulus; seed dormancy process; seed germination
Glyma.06G000600	-2.21146	0.000283051	AT1G20610.1|Symbols:CYCB2;3|Cyclin B2;3|chr1:7135073-7137273 REVERSE LENGTH=429	3e-158	GO:0000079 GO:0051726	regulation of cell cycle; regulation of cyclin-dependent protein serine/threonine kinase activity
Glyma.06G001800	-1.29208	7.54e-05	AT2G43030.1|Symbols:|Ribosomal protein L3 family protein|chr2:17894898-17895713 FORWARD LENGTH=271	4e-131	GO:0006364 GO:0006412 GO:0010207 GO:0015995 GO:0019288 GO:0045036	chlorophyll biosynthetic process; isopentenyl diphosphate biosynthetic process, mevalonate-independent pathway; photosystem II assembly; protein targeting to chloroplast; rRNA processing; translation
Glyma.06G002600	-0.777983	0.00330782	AT3G06980.1|Symbols:|DEA(D/H)-box RNA helicase family protein|chr3:2201531-2204662 FORWARD LENGTH=781	0	GO:0006364 GO:0006399 GO:0006655 GO:0009658 GO:0009793 GO:0010103 GO:0016226 GO:0019288	chloroplast organization; embryo development ending in seed dormancy; iron-sulfur cluster assembly; isopentenyl diphosphate biosynthetic process, mevalonate-independent pathway; phosphatidylglycerol biosynthetic process; rRNA processing; stomatal complex morphogenesis; tRNA metabolic process
Glyma.06G003300	1.09276	0.000162801	AT5G47900.1|Symbols:|Protein of unknown function (DUF1624)|chr5:19392408-19394963 FORWARD LENGTH=440	3e-128	GO:0008150	biological process
Glyma.06G005700	1.4265	0.000680917	AT4G38800.1|Symbols:ATMTN1, ATMTAN1, MTN1, MTAN1|methylthioadenosine nucleosidase 1|chr4:18113355-18114996 REVERSE LENGTH=267	2e-98	GO:0000003 GO:0001944 GO:0009116 GO:0019509 GO:0048573	L-methionine salvage from methylthioadenosine; nucleoside metabolic process; photoperiodism, flowering; reproduction; vasculature development
Glyma.06G006100	1.73699	9.49e-05	AT5G18020.1|Symbols:|SAUR-like auxin-responsive protein family|chr5:5966305-5966580 REVERSE LENGTH=91	4e-13	GO:0009733	response to auxin stimulus
Glyma.06G009500	-1.26976	0.000354547	AT4G34610.2|Symbols:BLH6|BEL1-like homeodomain 6|chr4:16530546-16532498 REVERSE LENGTH=532	2e-122	GO:0006355 GO:0048513	organ development; regulation of transcription, DNA-dependent
Glyma.06G012100	1.24235	0.00129127	NA	NA	NA	NA
Glyma.06G012600	1.5693	1.69e-05	AT4G39260.3|Symbols:CCR1, ATGRP8, GR-RBP8, GRP8|cold, circadian rhythm, and RNA binding 1|chr4:18274166-18274958 REVERSE LENGTH=92	2e-44	GO:0000380 GO:0007623 GO:0009409 GO:0009651 GO:0009737 GO:0010043 GO:0045087	alternative mRNA splicing, via spliceosome; circadian rhythm; innate immune response; response to abscisic acid stimulus; response to cold; response to salt stress; response to zinc ion
Glyma.06G012900	0.961307	0.00108552	AT4G34480.1|Symbols:|O-Glycosyl hydrolases family 17 protein|chr4:16481147-16483988 REVERSE LENGTH=504	0	GO:0005975	carbohydrate metabolic process
Glyma.06G013000	1.1866	0.00411825	AT4G34460.1|Symbols:AGB1, ELK4, ATAGB1|GTP binding protein beta 1|chr4:16477393-16479266 REVERSE LENGTH=377	0	GO:0000165 GO:0006355 GO:0006612 GO:0007154 GO:0009409 GO:0009617 GO:0009723 GO:0009737 GO:0009738 GO:0009788 GO:0009817 GO:0009845 GO:0009862 GO:0009863 GO:0009867 GO:0009887 GO:0009991 GO:0010154 GO:0010200 GO:0010310 GO:0010363 GO:0030968 GO:0031348 GO:0035304 GO:0042744 GO:0043069 GO:0048193 GO:0048364 GO:0048527 GO:0050832 GO:0051707 GO:0072593	Golgi vesicle transport; MAPK cascade; abscisic acid mediated signaling pathway; cell communication; defense response to fungus; defense response to fungus, incompatible interaction; endoplasmic reticulum unfolded protein response; fruit development; hydrogen peroxide catabolic process; jasmonic acid mediated signaling pathway; lateral root development; negative regulation of abscisic acid mediat…
Glyma.06G014600	-1.7993	1.49e-10	AT2G33620.4|Symbols:|AT hook motif DNA-binding family protein|chr2:14234749-14236563 FORWARD LENGTH=351	1e-66	GO:0007389 GO:0048438 GO:0048439	floral whorl development; flower morphogenesis; pattern specification process
Glyma.06G015000	0.853333	0.000925214	AT4G35300.4|Symbols:TMT2|tonoplast monosaccharide transporter2|chr4:16796432-16799071 REVERSE LENGTH=739	0	GO:0006810 GO:0055085	transmembrane transport; transport
Glyma.06G015300	-0.893599	0.00939282	AT1G76405.2|Symbols:|unknown protein; FUNCTIONS IN: molecular_function unknown; INVOLVED IN: biological_process unknown; LOCATED IN: chloroplast envelope; EXPRESSED IN: 21 plant structures; EXPRESSED DURING: 13 growth stages; BEST Arabidopsis thaliana protein match is: unknown protein (TAIR:AT1G20816.1); Has 52 Blast hits to 52 proteins in 19 species: Archae - 0; Bacteria - 0; Metazoa - 0; Fungi …	3e-75	GO:0008150	biological process
Glyma.06G017800	1.05503	0.00259975	AT1G20640.2|Symbols:|Plant regulator RWP-RK family protein|chr1:7155201-7157986 FORWARD LENGTH=844	0	GO:0009877	nodulation
Glyma.06G018100	-1.58049	0.0096512	AT5G42330.1|Symbols:|unknown protein; Has 35333 Blast hits to 34131 proteins in 2444 species: Archae - 798; Bacteria - 22429; Metazoa - 974; Fungi - 991; Plants - 531; Viruses - 0; Other Eukaryotes - 9610 (source: NCBI BLink).|chr5:16926672-16927370 FORWARD LENGTH=205	4e-39	GO:0008150	biological process
Glyma.06G020500	1.44562	0.00590178	AT4G35790.2|Symbols:ATPLDDELTA, PLDDELTA|phospholipase D delta|chr4:16955774-16959875 REVERSE LENGTH=857	0	GO:0009409 GO:0009789 GO:0012501 GO:0046473 GO:0090333	phosphatidic acid metabolic process; positive regulation of abscisic acid mediated signaling pathway; programmed cell death; regulation of stomatal closure; response to cold
Glyma.06G022800	1.43999	0.000263979	AT1G75900.1|Symbols:|GDSL-like Lipase/Acylhydrolase superfamily protein|chr1:28499179-28500943 FORWARD LENGTH=364	3e-156	GO:0006629 GO:0019761 GO:0019953	glucosinolate biosynthetic process; lipid metabolic process; sexual reproduction
Glyma.06G023300	0.931785	0.00484183	AT4G35020.3|Symbols:RAC3|RAC-like 3|chr4:16673176-16674540 FORWARD LENGTH=198	7e-127	GO:0000226 GO:0000394 GO:0006184 GO:0007015 GO:0007165 GO:0007264 GO:0009086 GO:0009860 GO:0015031	GTP catabolic process; RNA splicing, via endonucleolytic cleavage and ligation; actin filament organization; methionine biosynthetic process; microtubule cytoskeleton organization; pollen tube growth; protein transport; signal transduction; small GTPase mediated signal transduction
Glyma.06G023500	-2.43272	0.000286785	AT1G20060.1|Symbols:|ATP binding microtubule motor family protein|chr1:6950723-6956293 REVERSE LENGTH=970	4e-143	GO:0007018	microtubule-based movement
Glyma.06G025400	1.08038	0.000157409	AT1G19835.2|Symbols:|Plant protein of unknown function (DUF869)|chr1:6856212-6859513 REVERSE LENGTH=982	0	GO:0008150	biological process
Glyma.06G030900	1.14835	6.68e-05	AT4G39230.1|Symbols:|NmrA-like negative transcriptional regulator family protein|chr4:18266024-18267604 REVERSE LENGTH=308	2e-168	GO:0046686	response to cadmium ion
Glyma.06G033100	-2.70827	1.59e-05	AT1G75150.1|Symbols:|unknown protein; Has 38228 Blast hits to 24529 proteins in 1168 species: Archae - 169; Bacteria - 4103; Metazoa - 14594; Fungi - 5866; Plants - 1861; Viruses - 317; Other Eukaryotes - 11318 (source: NCBI BLink).|chr1:28204709-28208512 REVERSE LENGTH=784	5e-74	GO:0006270 GO:0006275 GO:0006346 GO:0008150 GO:0016246 GO:0051726	DNA replication initiation; RNA interference; biological process; methylation-dependent chromatin silencing; regulation of DNA replication; regulation of cell cycle
Glyma.06G033700	1.50245	1.88e-05	AT1G75100.1|Symbols:JAC1|J-domain protein required for chloroplast accumulation response 1|chr1:28191108-28193769 REVERSE LENGTH=651	9e-70	GO:0007015 GO:0009903 GO:0009904 GO:0071483	actin filament organization; cellular response to blue light; chloroplast accumulation movement; chloroplast avoidance movement
Glyma.06G033900	-1.30103	0.00828975	AT1G75090.1|Symbols:|DNA glycosylase superfamily protein|chr1:28187647-28189612 REVERSE LENGTH=329	1e-113	GO:0006281 GO:0006284 GO:0006306	DNA methylation; DNA repair; base-excision repair
Glyma.06G039800	-2.83992	1.27e-07	AT4G33400.1|Symbols:|Vacuolar import/degradation, Vid27-related protein|chr4:16078189-16080410 REVERSE LENGTH=645	0	GO:0006260 GO:0006275 GO:0006306 GO:0006342 GO:0006499 GO:0008283 GO:0009640 GO:0009909 GO:0010388 GO:0010389 GO:0016458 GO:0016567 GO:0016571 GO:0016572 GO:0016579 GO:0031047 GO:0034968 GO:0045893 GO:0051567	DNA methylation; DNA replication; N-terminal protein myristoylation; cell proliferation; chromatin silencing; cullin deneddylation; gene silencing; gene silencing by RNA; histone H3-K9 methylation; histone lysine methylation; histone methylation; histone phosphorylation; photomorphogenesis; positive regulation of transcription, DNA-dependent; protein deubiquitination; protein ubiquitination; regu…
Glyma.06G043900	-2.9089	0.000241129	AT1G47230.1|Symbols:CYCA3;4|CYCLIN A3;4|chr1:17306752-17308587 FORWARD LENGTH=369	2e-129	GO:0000079 GO:0000278 GO:0010389 GO:0010440 GO:0042023 GO:0045736 GO:0051726	DNA endoreduplication; mitotic cell cycle; negative regulation of cyclin-dependent protein serine/threonine kinase activity; regulation of G2/M transition of mitotic cell cycle; regulation of cell cycle; regulation of cyclin-dependent protein serine/threonine kinase activity; stomatal lineage progression
Glyma.06G044400	7.25163	3.72e-13	AT5G59845.1|Symbols:|Gibberellin-regulated family protein|chr5:24111443-24111808 FORWARD LENGTH=89	2e-34	GO:0009739	response to gibberellin stimulus
Glyma.06G044500	3.10253	4.27e-06	AT2G33430.1|Symbols:DAL1, DAL|differentiation and greening-like 1|chr2:14162732-14164729 FORWARD LENGTH=219	5e-24	GO:0000478 GO:0002103 GO:0006364 GO:0006399 GO:0009657 GO:0009658 GO:0009902 GO:0009965 GO:0010027 GO:0010207 GO:0030154 GO:0034660 GO:0035304 GO:0042793 GO:0045893	cell differentiation; chloroplast organization; chloroplast relocation; endonucleolytic cleavage involved in rRNA processing; endonucleolytic cleavage of tetracistronic rRNA transcript (SSU-rRNA, LSU-rRNA, 4.5S-rRNA, 5S-rRNA); leaf morphogenesis; ncRNA metabolic process; photosystem II assembly; plastid organization; positive regulation of transcription, DNA-dependent; rRNA processing; regulation…
Glyma.06G044600	0.906975	0.000955257	AT4G24220.1|Symbols:VEP1, AWI31|NAD(P)-binding Rossmann-fold superfamily protein|chr4:12565219-12566474 FORWARD LENGTH=388	0	GO:0008202 GO:0009611 GO:0010051	response to wounding; steroid metabolic process; xylem and phloem pattern formation
Glyma.06G045100	1.37091	2.53e-05	AT5G67360.1|Symbols:ARA12|Subtilase family protein|chr5:26872192-26874465 REVERSE LENGTH=757	0	GO:0006508 GO:0010214 GO:0043086 GO:0048359 GO:0080001	mucilage extrusion from seed coat; mucilage metabolic process involved seed coat development; negative regulation of catalytic activity; proteolysis; seed coat development
Glyma.06G046000	0.898021	0.000258327	AT1G27770.1|Symbols:ACA1, PEA1|autoinhibited Ca2+-ATPase 1|chr1:9671912-9676010 REVERSE LENGTH=1020	0	GO:0006754 GO:0006812 GO:0006816 GO:0006882 GO:0008152 GO:0009624 GO:0070588	ATP biosynthetic process; calcium ion transmembrane transport; calcium ion transport; cation transport; cellular zinc ion homeostasis; metabolic process; response to nematode
Glyma.06G050500	2.36479	1.32e-10	AT5G11740.1|Symbols:AGP15, ATAGP15|arabinogalactan protein 15|chr5:3784318-3784503 FORWARD LENGTH=61	1e-06	NA	NA
Glyma.06G052800	-5.28452	1.72e-09	AT2G26180.1|Symbols:IQD6|IQ-domain 6|chr2:11143433-11144982 REVERSE LENGTH=416	2e-139	NA	NA
Glyma.06G053000	2.24246	2.32e-07	AT5G11950.2|Symbols:|Putative lysine decarboxylase family protein|chr5:3855072-3856815 FORWARD LENGTH=216	1e-125	GO:0009089	lysine biosynthetic process via diaminopimelate
Glyma.06G056500	-1.36978	0.000197327	AT4G33200.1|Symbols:XI-I, ATXI-I, XI-15|myosin, putative|chr4:16002768-16014792 REVERSE LENGTH=1522	0	GO:0006606 GO:0030048 GO:0051645 GO:0051646 GO:0060151	Golgi localization; actin filament-based movement; mitochondrion localization; peroxisome localization; protein import into nucleus
Glyma.06G058300	-2.68391	4.26e-05	AT2G45700.1|Symbols:|sterile alpha motif (SAM) domain-containing protein|chr2:18827216-18830505 REVERSE LENGTH=723	0	GO:0007062 GO:0009630 GO:0031048 GO:0045132	chromatin silencing by small RNA; gravitropism; meiotic chromosome segregation; sister chromatid cohesion
Glyma.06G061000	-0.989861	0.00525085	AT4G31850.1|Symbols:PGR3|proton gradient regulation 3|chr4:15403020-15406358 FORWARD LENGTH=1112	0	GO:0000023 GO:0000272 GO:0005982 GO:0006098 GO:0006655 GO:0008150 GO:0009664 GO:0009902 GO:0010027 GO:0010075 GO:0019252 GO:0019288 GO:0034660 GO:0046777	biological process; chloroplast relocation; isopentenyl diphosphate biosynthetic process, mevalonate-independent pathway; maltose metabolic process; ncRNA metabolic process; pentose-phosphate shunt; phosphatidylglycerol biosynthetic process; plant-type cell wall organization; polysaccharide catabolic process; protein autophosphorylation; regulation of meristem growth; starch biosynthetic process;…
Glyma.06G061200	-2.31692	0.000357735	AT2G25060.1|Symbols:ENODL14, AtENODL14|early nodulin-like protein 14|chr2:10662308-10662930 FORWARD LENGTH=182	1e-60	GO:0000226 GO:0000911 GO:0016572	cytokinesis by cell plate formation; histone phosphorylation; microtubule cytoskeleton organization
Glyma.06G064400	1.74823	0.00250739	AT2G25220.1|Symbols:|Protein kinase superfamily protein|chr2:10742918-10745540 REVERSE LENGTH=414	7e-176	GO:0006468	protein phosphorylation
Glyma.06G067000	1.86614	3.28e-08	AT2G45180.1|Symbols:|Bifunctional inhibitor/lipid-transfer protein/seed storage 2S albumin superfamily protein|chr2:18626377-18626781 FORWARD LENGTH=134	5e-37	GO:0000038 GO:0006869 GO:0042335	cuticle development; lipid transport; very long-chain fatty acid metabolic process
Glyma.06G068800	1.13104	0.00379759	AT5G25390.2|Symbols:SHN2|Integrase-type DNA-binding superfamily protein|chr5:8820637-8821741 FORWARD LENGTH=189	1e-75	GO:0006355	regulation of transcription, DNA-dependent
Glyma.06G069000	0.938909	0.006664	AT2G26660.1|Symbols:ATSPX2, SPX2|SPX domain gene 2|chr2:11338932-11340703 FORWARD LENGTH=287	7e-85	GO:0006817 GO:0016036 GO:0019375 GO:0045892	cellular response to phosphate starvation; galactolipid biosynthetic process; negative regulation of transcription, DNA-dependent; phosphate ion transport
Glyma.06G069700	-0.905366	0.00229654	AT5G11270.1|Symbols:OCP3|overexpressor of cationic peroxidase 3|chr5:3595557-3597076 REVERSE LENGTH=354	2e-59	GO:0006355 GO:0006952 GO:0009414 GO:0009737 GO:0009867 GO:0010118 GO:0050832	defense response; defense response to fungus; jasmonic acid mediated signaling pathway; regulation of transcription, DNA-dependent; response to abscisic acid stimulus; response to water deprivation; stomatal movement
Glyma.06G072900	-3.28883	1.48e-05	AT5G11300.1|Symbols:CYC3B, CYC2BAT, CYCA2;2|mitotic-like cyclin 3B from Arabidopsis|chr5:3601811-3604466 REVERSE LENGTH=436	7e-151	GO:0000079 GO:0008283 GO:0010090 GO:0010389 GO:0042023 GO:0043161 GO:0043248 GO:0051302 GO:0051510 GO:0051726 GO:0051788 GO:2000123	DNA endoreduplication; cell proliferation; positive regulation of stomatal complex development; proteasomal ubiquitin-dependent protein catabolic process; proteasome assembly; regulation of G2/M transition of mitotic cell cycle; regulation of cell cycle; regulation of cell division; regulation of cyclin-dependent protein serine/threonine kinase activity; regulation of unidimensional cell growth; …
Glyma.06G073600	-1.01621	0.00924354	AT5G11450.1|Symbols:|Mog1/PsbP/DUF1795-like photosystem II reaction center PsbP family protein|chr5:3654475-3656357 FORWARD LENGTH=297	2e-114	GO:0000023 GO:0010027 GO:0015979 GO:0019252 GO:0019288 GO:0045036 GO:0045893	isopentenyl diphosphate biosynthetic process, mevalonate-independent pathway; maltose metabolic process; photosynthesis; positive regulation of transcription, DNA-dependent; protein targeting to chloroplast; starch biosynthetic process; thylakoid membrane organization
Glyma.06G074800	-1.68906	0.000252727	AT5G25580.1|Symbols:|BEST Arabidopsis thaliana protein match is: DDT domain superfamily (TAIR:AT1G18950.1); Has 178 Blast hits to 178 proteins in 75 species: Archae - 0; Bacteria - 4; Metazoa - 51; Fungi - 33; Plants - 60; Viruses - 1; Other Eukaryotes - 29 (source: NCBI BLink).|chr5:8903550-8906108 FORWARD LENGTH=405	5e-66	GO:0000911 GO:0006260 GO:0006306 GO:0006346 GO:0008150 GO:0008283 GO:0009909 GO:0031048 GO:0034968 GO:0051567	DNA methylation; DNA replication; biological process; cell proliferation; chromatin silencing by small RNA; cytokinesis by cell plate formation; histone H3-K9 methylation; histone lysine methylation; methylation-dependent chromatin silencing; regulation of flower development
Glyma.06G076900	1.18178	0.0038741	AT2G24540.1|Symbols:AFR|Galactose oxidase/kelch repeat superfamily protein|chr2:10426414-10427532 FORWARD LENGTH=372	2e-111	GO:0009585 GO:0009744 GO:0009813 GO:0010017 GO:0010224 GO:0010264	flavonoid biosynthetic process; myo-inositol hexakisphosphate biosynthetic process; red, far-red light phototransduction; red or far-red light signaling pathway; response to UV-B; response to sucrose stimulus
Glyma.06G077800	1.1189	0.000238625	AT4G31600.1|Symbols:|UDP-N-acetylglucosamine (UAA) transporter family|chr4:15315232-15316909 REVERSE LENGTH=323	0	GO:0015785 GO:0015786 GO:0048527 GO:0080147	UDP-galactose transport; UDP-glucose transport; lateral root development; root hair cell development
Glyma.06G078200	-1.04434	0.00555096	AT4G20325.1|Symbols:|FUNCTIONS IN: molecular_function unknown; INVOLVED IN: biological_process unknown; LOCATED IN: nucleus; CONTAINS InterPro DOMAIN/s: Ribonuclease H2, subunit B (InterPro:IPR019024); Has 30201 Blast hits to 17322 proteins in 780 species: Archae - 12; Bacteria - 1396; Metazoa - 17338; Fungi - 3422; Plants - 5037; Viruses - 0; Other Eukaryotes - 2996 (source: NCBI BLink).|chr4:10…	9e-114	GO:0008150	biological process
Glyma.06G081100	3.03445	9.94e-05	AT5G25610.1|Symbols:RD22, ATRD22|BURP domain-containing protein|chr5:8914498-8916684 REVERSE LENGTH=392	4e-124	GO:0009269 GO:0009409 GO:0009651 GO:0009737	response to abscisic acid stimulus; response to cold; response to desiccation; response to salt stress
Glyma.06G081500	-0.903504	0.00171573	AT5G11480.1|Symbols:|P-loop containing nucleoside triphosphate hydrolases superfamily protein|chr5:3669350-3671471 REVERSE LENGTH=318	4e-147	GO:0000917 GO:0006364 GO:0006399 GO:0009658	barrier septum assembly; chloroplast organization; rRNA processing; tRNA metabolic process
Glyma.06G082000	2.49813	8.8e-08	AT2G25737.1|Symbols:|Sulfite exporter TauE/SafE family protein|chr2:10977174-10979677 FORWARD LENGTH=476	0	NA	NA
Glyma.06G082300	-2.63185	3.48e-06	AT4G32730.2|Symbols:PC-MYB1, MYB3R-1, ATMYB3R-1, ATMYB3R1|Homeodomain-like protein|chr4:15791039-15795643 FORWARD LENGTH=995	0	GO:0000911 GO:0006355	cytokinesis by cell plate formation; regulation of transcription, DNA-dependent
Glyma.06G087200	0.802374	0.00824933	AT4G32870.1|Symbols:|Polyketide cyclase/dehydrase and lipid transport superfamily protein|chr4:15862168-15862641 FORWARD LENGTH=157	8e-52	GO:0008150	biological process
Glyma.06G088800	-2.43695	6.65e-08	AT4G32830.1|Symbols:AtAUR1, AUR1|ataurora1|chr4:15842557-15844354 FORWARD LENGTH=294	0	GO:0000278 GO:0006342 GO:0016572 GO:0051567	chromatin silencing; histone H3-K9 methylation; histone phosphorylation; mitotic cell cycle
Glyma.06G089700	-1.03477	0.000838543	AT5G17870.1|Symbols:PSRP6|plastid-specific 50S ribosomal protein 6|chr5:5907817-5908137 FORWARD LENGTH=106	2e-24	GO:0006412	translation
Glyma.06G090700	1.57031	3.23e-05	AT5G49660.1|Symbols:|Leucine-rich repeat transmembrane protein kinase family protein|chr5:20161401-20164534 REVERSE LENGTH=966	0	GO:0002237 GO:0006468 GO:0006612 GO:0007165 GO:0009963 GO:0010051 GO:0010103 GO:0010363 GO:0048443	positive regulation of flavonoid biosynthetic process; protein phosphorylation; protein targeting to membrane; regulation of plant-type hypersensitive response; response to molecule of bacterial origin; signal transduction; stamen development; stomatal complex morphogenesis; xylem and phloem pattern formation
Glyma.06G091100	2.12972	0.000184213	AT1G58340.1|Symbols:ZF14|MATE efflux family protein|chr1:21653162-21655117 FORWARD LENGTH=532	0	GO:0003156 GO:0006810 GO:0006855 GO:0009624 GO:0055072 GO:0055085	drug transmembrane transport; iron ion homeostasis; regulation of organ formation; response to nematode; transmembrane transport; transport
Glyma.06G094300	1.01077	4.63e-05	AT4G24620.1|Symbols:PGI1, PGI|phosphoglucose isomerase 1|chr4:12708972-12712610 REVERSE LENGTH=613	0	GO:0000023 GO:0000272 GO:0005982 GO:0006094 GO:0006096 GO:0009664 GO:0009911 GO:0019252 GO:0019288 GO:0043085	gluconeogenesis; glycolysis; isopentenyl diphosphate biosynthetic process, mevalonate-independent pathway; maltose metabolic process; plant-type cell wall organization; polysaccharide catabolic process; positive regulation of catalytic activity; positive regulation of flower development; starch biosynthetic process; starch metabolic process
Glyma.06G096600	-2.59694	6.95e-06	AT5G33300.1|Symbols:|chromosome-associated kinesin-related|chr5:12562649-12565675 REVERSE LENGTH=439	7e-58	GO:0006259 GO:0006342 GO:0007126 GO:0008150 GO:0009887 GO:0009888 GO:0010089 GO:0010638 GO:0033044 GO:0044036 GO:0051567	DNA metabolic process; biological process; cell wall macromolecule metabolic process; chromatin silencing; histone H3-K9 methylation; meiosis; organ morphogenesis; positive regulation of organelle organization; regulation of chromosome organization; tissue development; xylem development
Glyma.06G097100	0.751606	0.0064465	AT1G09710.1|Symbols:|Homeodomain-like superfamily protein|chr1:3141119-3144232 FORWARD LENGTH=610	4e-74	NA	NA
Glyma.06G100500	-2.92317	0.00673009	AT3G12870.1|Symbols:|unknown protein; BEST Arabidopsis thaliana protein match is: unknown protein (TAIR:AT5G56120.1); Has 70 Blast hits to 70 proteins in 12 species: Archae - 0; Bacteria - 0; Metazoa - 0; Fungi - 0; Plants - 70; Viruses - 0; Other Eukaryotes - 0 (source: NCBI BLink).|chr3:4094417-4095037 REVERSE LENGTH=206	4e-95	NA	NA
Glyma.06G102000	3.37238	3.56e-06	AT4G08950.1|Symbols:EXO|Phosphate-responsive 1 family protein|chr4:5740378-5741322 FORWARD LENGTH=314	3e-147	GO:0009741 GO:0016126	response to brassinosteroid stimulus; sterol biosynthetic process
Glyma.06G102100	2.4207	2.06e-05	AT4G08950.1|Symbols:EXO|Phosphate-responsive 1 family protein|chr4:5740378-5741322 FORWARD LENGTH=314	9e-154	GO:0009741 GO:0016126	response to brassinosteroid stimulus; sterol biosynthetic process
Glyma.06G103700	-1.35729	0.000169839	AT1G78170.1|Symbols:|unknown protein; BEST Arabidopsis thaliana protein match is: unknown protein (TAIR:AT1G22250.1); Has 66 Blast hits to 66 proteins in 11 species: Archae - 0; Bacteria - 0; Metazoa - 0; Fungi - 0; Plants - 66; Viruses - 0; Other Eukaryotes - 0 (source: NCBI BLink).|chr1:29414160-29414941 FORWARD LENGTH=221	9e-21	GO:0008150	biological process
Glyma.06G104200	-0.742275	0.00970747	AT1G78150.2|Symbols:|unknown protein; BEST Arabidopsis thaliana protein match is: unknown protein (TAIR:AT1G35780.1); Has 35333 Blast hits to 34131 proteins in 2444 species: Archae - 798; Bacteria - 22429; Metazoa - 974; Fungi - 991; Plants - 531; Viruses - 0; Other Eukaryotes - 9610 (source: NCBI BLink).|chr1:29404996-29406341 FORWARD LENGTH=274	3e-126	GO:0008150 GO:0010048	biological process; vernalization response
Glyma.06G109200	1.40501	0.00563672	AT1G77760.1|Symbols:NIA1, GNR1, NR1|nitrate reductase 1|chr1:29236005-29239367 REVERSE LENGTH=917	0	GO:0006809 GO:0009416 GO:0042128 GO:0055114	nitrate assimilation; nitric oxide biosynthetic process; oxidation-reduction process; response to light stimulus
Glyma.06G109800	-1.07157	0.00819043	AT1G77720.1|Symbols:PPK1|putative protein kinase 1|chr1:29210730-29213877 FORWARD LENGTH=777	0	GO:0000226 GO:0000911 GO:0006306 GO:0006342 GO:0006346 GO:0006468 GO:0007267 GO:0009616 GO:0009909 GO:0010267 GO:0016570 GO:0031047 GO:0031048 GO:0035196 GO:0046777 GO:0048449 GO:0051567	DNA methylation; cell-cell signaling; chromatin silencing; chromatin silencing by small RNA; cytokinesis by cell plate formation; floral organ formation; gene silencing by RNA; histone H3-K9 methylation; histone modification; methylation-dependent chromatin silencing; microtubule cytoskeleton organization; production of miRNAs involved in gene silencing by miRNA; production of ta-siRNAs involved …
Glyma.06G112200	1.6311	0.00169764	AT4G08300.1|Symbols:|nodulin MtN21 /EamA-like transporter family protein|chr4:5245024-5248153 FORWARD LENGTH=373	3e-171	NA	NA
Glyma.06G113100	1.39832	0.00818355	AT4G08330.1|Symbols:|unknown protein; FUNCTIONS IN: molecular_function unknown; INVOLVED IN: biological_process unknown; LOCATED IN: plasma membrane; EXPRESSED IN: 24 plant structures; EXPRESSED DURING: 14 growth stages; BEST Arabidopsis thaliana protein match is: unknown protein (TAIR:AT2G17705.1); Has 98 Blast hits to 98 proteins in 13 species: Archae - 0; Bacteria - 0; Metazoa - 0; Fungi - 0; …	2e-46	GO:0008150	biological process
Glyma.06G113300	-4.79416	4.75e-08	AT1G77580.1|Symbols:|Plant protein of unknown function (DUF869)|chr1:29144632-29146600 REVERSE LENGTH=629	1e-80	NA	NA
Glyma.06G116000	-1.35098	0.00316272	AT1G21690.1|Symbols:EMB1968, RFC4|ATPase family associated with various cellular activities (AAA)|chr1:7615675-7618362 FORWARD LENGTH=339	0	GO:0001510 GO:0006260 GO:0009220 GO:0009793 GO:0009909 GO:0016570 GO:0048449	DNA replication; RNA methylation; embryo development ending in seed dormancy; floral organ formation; histone modification; pyrimidine ribonucleotide biosynthetic process; regulation of flower development
Glyma.06G116100	-3.41724	1.04e-05	AT1G44110.1|Symbols:CYCA1;1|Cyclin A1;1|chr1:16775035-16777182 REVERSE LENGTH=460	0	GO:0000079 GO:0000911 GO:0006260 GO:0006270 GO:0006275 GO:0006306 GO:0008283 GO:0009909 GO:0010103 GO:0010389 GO:0010583 GO:0016458 GO:0016572 GO:0034968 GO:0042127 GO:0051567 GO:0051726	DNA methylation; DNA replication; DNA replication initiation; cell proliferation; cytokinesis by cell plate formation; gene silencing; histone H3-K9 methylation; histone lysine methylation; histone phosphorylation; regulation of DNA replication; regulation of G2/M transition of mitotic cell cycle; regulation of cell cycle; regulation of cell proliferation; regulation of cyclin-dependent protein s…
Glyma.06G116900	-1.96799	0.0011391	AT1G21650.2|Symbols:SECA2|Preprotein translocase SecA family protein|chr1:7592891-7600590 REVERSE LENGTH=1058	0	GO:0006605 GO:0006886 GO:0009790 GO:0017038	embryo development; intracellular protein transport; protein import; protein targeting
Glyma.06G124800	1.0079	0.000474083	AT5G53310.1|Symbols:|myosin heavy chain-related|chr5:21634657-21636094 FORWARD LENGTH=210	6e-66	GO:0006623 GO:0006944 GO:0010200 GO:0016192 GO:0048193	Golgi vesicle transport; cellular membrane fusion; protein targeting to vacuole; response to chitin; vesicle-mediated transport
Glyma.06G125500	-5.96822	0.00224645	AT5G53210.1|Symbols:SPCH|basic helix-loop-helix (bHLH) DNA-binding superfamily protein|chr5:21586606-21588941 REVERSE LENGTH=364	8e-108	GO:0006355 GO:0010103 GO:0010374 GO:0042127	regulation of cell proliferation; regulation of transcription, DNA-dependent; stomatal complex development; stomatal complex morphogenesis
Glyma.06G125800	6.95537	5.6e-05	AT5G53190.1|Symbols:SWEET3, AtSWEET3|Nodulin MtN3 family protein|chr5:21572417-21574284 REVERSE LENGTH=263	7e-98	GO:0008150	biological process
Glyma.06G127900	1.03695	0.00580994	AT5G53420.1|Symbols:|CCT motif family protein|chr5:21673683-21675469 FORWARD LENGTH=264	2e-87	GO:0008150	biological process
Glyma.06G128700	1.71474	0.000124749	AT5G24270.2|Symbols:SOS3|Calcium-binding EF-hand family protein|chr5:8238781-8240179 REVERSE LENGTH=222	9e-108	GO:0005513 GO:0006499 GO:0010118 GO:0019722 GO:0030007 GO:0042539	N-terminal protein myristoylation; calcium-mediated signaling; cellular potassium ion homeostasis; detection of calcium ion; hypotonic salinity response; stomatal movement
Glyma.06G130800	-1.09388	0.00122773	AT5G24314.1|Symbols:PDE225, PTAC7|plastid transcriptionally active7|chr5:8277750-8279099 FORWARD LENGTH=161	5e-65	GO:0008150	biological process
Glyma.06G134000	1.85811	3.08e-05	AT2G46690.1|Symbols:|SAUR-like auxin-responsive protein family|chr2:19180904-19181269 FORWARD LENGTH=121	3e-42	GO:0006816 GO:0009733	calcium ion transport; response to auxin stimulus
Glyma.06G134900	2.20991	0.000220485	AT4G27670.1|Symbols:HSP21|heat shock protein 21|chr4:13819048-13819895 REVERSE LENGTH=227	6e-89	GO:0006457 GO:0009408 GO:0009644 GO:0010286 GO:0042542	heat acclimation; protein folding; response to heat; response to high light intensity; response to hydrogen peroxide
Glyma.06G135100	0.979356	0.00555096	AT2G46780.1|Symbols:|RNA-binding (RRM/RBD/RNP motifs) family protein|chr2:19229516-19231043 FORWARD LENGTH=336	8e-49	GO:0008150	biological process
Glyma.06G136500	-1.09813	7.09e-05	AT5G24490.1|Symbols:|30S ribosomal protein, putative|chr5:8365690-8367178 FORWARD LENGTH=308	5e-123	GO:0006412 GO:0044238	primary metabolic process; translation
Glyma.06G137700	-0.866641	0.00957598	AT3G49470.1|Symbols:NACA2|nascent polypeptide-associated complex subunit alpha-like protein 2|chr3:18341072-18342273 FORWARD LENGTH=217	8e-80	GO:0008150	biological process
Glyma.06G140900	-0.830492	0.00384286	AT1G26910.1|Symbols:RPL10B|Ribosomal protein L16p/L10e family protein|chr1:9321709-9322813 FORWARD LENGTH=221	2e-147	GO:0001510 GO:0006412 GO:0010224 GO:0032502	RNA methylation; developmental process; response to UV-B; translation
Glyma.06G142200	2.34094	0.000161744	NA	NA	NA	NA
Glyma.06G143400	-2.18941	0.000219163	AT2G40550.1|Symbols:ETG1|E2F target gene 1|chr2:16934927-16938033 FORWARD LENGTH=589	0	GO:0000278 GO:0000724 GO:0006260 GO:0006261 GO:0006270 GO:0006275 GO:0006301 GO:0006306 GO:0007062 GO:0008283 GO:0009555 GO:0010090 GO:0016444 GO:0016568 GO:0031047 GO:0042023 GO:0051302 GO:0051567 GO:0051726	DNA-dependent DNA replication; DNA endoreduplication; DNA methylation; DNA replication; DNA replication initiation; cell proliferation; chromatin modification; double-strand break repair via homologous recombination; gene silencing by RNA; histone H3-K9 methylation; mitotic cell cycle; pollen development; postreplication repair; regulation of DNA replication; regulation of cell cycle; regulation …
Glyma.06G145000	0.747169	0.0060806	AT3G10940.1|Symbols:|dual specificity protein phosphatase (DsPTP1) family protein|chr3:3422259-3423394 REVERSE LENGTH=282	4e-139	GO:0000023 GO:0005983 GO:0006470 GO:0019252 GO:0043085	maltose metabolic process; positive regulation of catalytic activity; protein dephosphorylation; starch biosynthetic process; starch catabolic process
Glyma.06G147000	-2.2465	0.00840001	AT5G64830.2|Symbols:|programmed cell death 2 C-terminal domain-containing protein|chr5:25914911-25916074 REVERSE LENGTH=297	8e-59	NA	NA
Glyma.06G148500	-3.24604	3.82e-09	AT2G21790.1|Symbols:R1, RNR1, CLS8, ATRNR1|ribonucleotide reductase 1|chr2:9293529-9297580 FORWARD LENGTH=816	0	GO:0006094 GO:0006260 GO:0006261 GO:0007010 GO:0009165 GO:0009202 GO:0010498 GO:0046686 GO:0055114	DNA-dependent DNA replication; DNA replication; cytoskeleton organization; deoxyribonucleoside triphosphate biosynthetic process; gluconeogenesis; nucleotide biosynthetic process; oxidation-reduction process; proteasomal protein catabolic process; response to cadmium ion
Glyma.06G149100	-5.06558	5.55e-08	NA	NA	NA	NA
Glyma.06G149700	2.83054	3.21e-06	AT2G18465.1|Symbols:|Chaperone DnaJ-domain superfamily protein|chr2:8003223-8004742 REVERSE LENGTH=268	3e-35	GO:0006457	protein folding
Glyma.06G151000	1.09171	0.00548599	AT3G18750.3|Symbols:WNK6|with no lysine (K) kinase 6|chr3:6454307-6456830 REVERSE LENGTH=567	0	GO:0006468	protein phosphorylation
Glyma.06G151300	1.75082	1.63e-07	AT5G24320.1|Symbols:|Transducin/WD40 repeat-like superfamily protein|chr5:8284858-8287651 REVERSE LENGTH=694	1e-124	GO:0007165 GO:0010228 GO:0016926 GO:0050665	hydrogen peroxide biosynthetic process; protein desumoylation; signal transduction; vegetative to reproductive phase transition of meristem
Glyma.06G152500	-1.10994	0.00140527	AT5G64580.1|Symbols:|AAA-type ATPase family protein|chr5:25817391-25821465 REVERSE LENGTH=855	0	GO:0006364 GO:0006399 GO:0006508 GO:0009658 GO:0009790 GO:0016556	chloroplast organization; embryo development; mRNA modification; proteolysis; rRNA processing; tRNA metabolic process
Glyma.06G153900	1.52377	0.000680647	AT4G33440.1|Symbols:|Pectin lyase-like superfamily protein|chr4:16092020-16094732 FORWARD LENGTH=475	0	GO:0005975	carbohydrate metabolic process
Glyma.06G154500	-3.34053	2.96e-06	AT2G13610.1|Symbols:|ABC-2 type transporter family protein|chr2:5673827-5675776 REVERSE LENGTH=649	0	GO:0010103	stomatal complex morphogenesis
Glyma.06G155300	-1.66567	0.000561166	AT5G63960.1|Symbols:EMB2780|DNA binding;nucleotide binding;nucleic acid binding;DNA-directed DNA polymerases;DNA-directed DNA polymerases|chr5:25599597-25606672 FORWARD LENGTH=1095	0	GO:0000724 GO:0000911 GO:0006139 GO:0006260 GO:0006261 GO:0006275 GO:0006287 GO:0006297 GO:0006302 GO:0006306 GO:0006310 GO:0006312 GO:0006342 GO:0006346 GO:0007062 GO:0007067 GO:0007126 GO:0007129 GO:0007131 GO:0007267 GO:0007346 GO:0008283 GO:0009616 GO:0009909 GO:0010267 GO:0010332 GO:0010389 GO:0010564 GO:0016246 GO:0016458 GO:0016570 GO:0031047 GO:0031048 GO:0032204 GO:0034968 GO:0035196 GO:…	DNA-dependent DNA replication; DNA methylation; DNA recombination; DNA replication; DNA replication, removal of RNA primer; DNA replication proofreading; RNA interference; base-excision repair, gap-filling; cell-cell signaling; cell proliferation; chromatin silencing; chromatin silencing by small RNA; cytokinesis by cell plate formation; double-strand break repair; double-strand break repair via …
Glyma.06G157200	0.950863	0.00567003	AT5G63810.1|Symbols:BGAL10|beta-galactosidase 10|chr5:25537242-25541315 FORWARD LENGTH=741	0	GO:0005975 GO:0080167	carbohydrate metabolic process; response to karrikin
Glyma.06G158100	-0.96546	0.00271916	AT1G21810.1|Symbols:|Plant protein of unknown function (DUF869)|chr1:7656578-7658634 REVERSE LENGTH=628	3e-73	GO:0008150 GO:0048451 GO:0048453	biological process; petal formation; sepal formation
Glyma.06G160200	1.12895	0.000161744	AT1G72160.1|Symbols:|Sec14p-like phosphatidylinositol transfer family protein|chr1:27153823-27155609 REVERSE LENGTH=490	7e-169	GO:0006810	transport
Glyma.06G160300	-4.87098	1.15e-07	AT5G63660.1|Symbols:LCR74, PDF2.5|Scorpion toxin-like knottin superfamily protein|chr5:25485692-25486062 FORWARD LENGTH=73	5e-24	GO:0006952	defense response
Glyma.06G165000	-0.836	0.00586568	AT3G26744.4|Symbols:ICE1, ATICE1, SCRM|basic helix-loop-helix (bHLH) DNA-binding superfamily protein|chr3:9832953-9834790 REVERSE LENGTH=494	4e-126	GO:0006355 GO:0009409 GO:0009410 GO:0009640 GO:0009793 GO:0009845 GO:0009909 GO:0009933 GO:0010162 GO:0010182 GO:0010228 GO:0010388 GO:0010440 GO:0016567 GO:0016571 GO:0016579 GO:0019915 GO:0043687 GO:0045893 GO:0048522 GO:0050826	cullin deneddylation; embryo development ending in seed dormancy; histone methylation; lipid storage; meristem structural organization; photomorphogenesis; positive regulation of cellular process; positive regulation of transcription, DNA-dependent; post-translational protein modification; protein deubiquitination; protein ubiquitination; regulation of flower development; regulation of transcript…
Glyma.06G165700	1.18209	0.00357543	AT5G50915.2|Symbols:|basic helix-loop-helix (bHLH) DNA-binding superfamily protein|chr5:20710764-20712252 REVERSE LENGTH=286	3e-58	GO:0009739	response to gibberellin stimulus
Glyma.06G167700	-1.04656	0.00260297	AT3G48710.1|Symbols:|DEK domain-containing chromatin associated protein|chr3:18041024-18043995 FORWARD LENGTH=462	3e-113	GO:0010048	vernalization response
Glyma.06G170700	-1.25256	0.00663278	AT3G48530.1|Symbols:KING1|SNF1-related protein kinase regulatory subunit gamma 1|chr3:17987559-17989592 FORWARD LENGTH=424	0	GO:0008150	biological process
Glyma.06G171700	0.92189	0.00895844	AT5G14210.1|Symbols:|Leucine-rich repeat protein kinase family protein|chr5:4578503-4581374 REVERSE LENGTH=775	0	GO:0006468 GO:0007169	protein phosphorylation; transmembrane receptor protein tyrosine kinase signaling pathway
Glyma.06G175800	-0.871815	0.00211624	AT4G24750.1|Symbols:|Rhodanese/Cell cycle control phosphatase superfamily protein|chr4:12758422-12760749 REVERSE LENGTH=292	4e-139	GO:0006364 GO:0006399 GO:0008150 GO:0009658 GO:0019288 GO:0045036	biological process; chloroplast organization; isopentenyl diphosphate biosynthetic process, mevalonate-independent pathway; protein targeting to chloroplast; rRNA processing; tRNA metabolic process
Glyma.06G176400	-1.60606	9.36e-05	AT4G24730.3|Symbols:|Calcineurin-like metallo-phosphoesterase superfamily protein|chr4:12752696-12753631 REVERSE LENGTH=311	4e-159	NA	NA
Glyma.06G177400	-3.15178	6.39e-05	AT4G24710.1|Symbols:|P-loop containing nucleoside triphosphate hydrolases superfamily protein|chr4:12745752-12748995 REVERSE LENGTH=475	0	NA	NA
Glyma.06G177500	2.44333	4.43e-09	NA	NA	NA	NA
Glyma.06G177600	3.77247	1.22e-07	NA	NA	NA	NA
Glyma.06G178000	1.48029	0.00496439	AT3G48240.1|Symbols:|Octicosapeptide/Phox/Bem1p family protein|chr3:17867381-17868007 FORWARD LENGTH=180	1e-42	GO:0008150	biological process
Glyma.06G178200	-1.83103	1.66e-05	AT5G49160.1|Symbols:MET1, MET2, METI, DDM2, DMT01, DMT1|methyltransferase 1|chr5:19932501-19938186 FORWARD LENGTH=1534	0	GO:0006260 GO:0006261 GO:0006306 GO:0006333 GO:0006342 GO:0006349 GO:0008283 GO:0009294 GO:0009909 GO:0009910 GO:0010069 GO:0010216 GO:0010424 GO:0016458 GO:0034968 GO:0051567 GO:0090116	C-5 methylation of cytosine; DNA-dependent DNA replication; DNA mediated transformation; DNA methylation; DNA methylation on cytosine within a CG sequence; DNA replication; cell proliferation; chromatin assembly or disassembly; chromatin silencing; gene silencing; histone H3-K9 methylation; histone lysine methylation; maintenance of DNA methylation; negative regulation of flower development; regu…
Glyma.06G179900	-1.85791	0.00458887	AT3G48210.1|Symbols:|CONTAINS InterPro DOMAIN/s: Kinetochore-Ndc80 complex, subunit Spc25 (InterPro:IPR013255); Has 194 Blast hits to 194 proteins in 72 species: Archae - 0; Bacteria - 4; Metazoa - 72; Fungi - 39; Plants - 62; Viruses - 0; Other Eukaryotes - 17 (source: NCBI BLink).|chr3:17849435-17851396 FORWARD LENGTH=315	6e-33	GO:0000724 GO:0006302 GO:0006310 GO:0006312 GO:0007059 GO:0007062 GO:0007126 GO:0007129 GO:0007131 GO:0007140 GO:0008150 GO:0009560 GO:0010332 GO:0016444 GO:0032204 GO:0033044 GO:0042138 GO:0043247 GO:0045132	DNA recombination; biological process; chromosome segregation; double-strand break repair; double-strand break repair via homologous recombination; embryo sac egg cell differentiation; male meiosis; meiosis; meiotic DNA double-strand break formation; meiotic chromosome segregation; mitotic recombination; reciprocal meiotic recombination; regulation of chromosome organization; regulation of telome…
Glyma.06G180300	1.33822	0.000155671	AT5G50150.1|Symbols:|Protein of Unknown Function (DUF239)|chr5:20402444-20406375 REVERSE LENGTH=420	0	GO:0008150	biological process
Glyma.06G182200	-1.0548	0.00619049	AT5G62940.1|Symbols:HCA2, DOF5.6|Dof-type zinc finger DNA-binding family protein|chr5:25257183-25258504 REVERSE LENGTH=372	6e-54	GO:0006355 GO:0010067 GO:0010087 GO:0045893	phloem or xylem histogenesis; positive regulation of transcription, DNA-dependent; procambium histogenesis; regulation of transcription, DNA-dependent
Glyma.06G185200	0.920064	0.00456381	AT5G50100.1|Symbols:|Putative thiol-disulphide oxidoreductase DCC|chr5:20371916-20373172 FORWARD LENGTH=214	3e-82	GO:0008150 GO:0010264	biological process; myo-inositol hexakisphosphate biosynthetic process
Glyma.06G185300	1.63596	0.000377255	AT5G14920.1|Symbols:|Gibberellin-regulated family protein|chr5:4826598-4827761 FORWARD LENGTH=275	8e-23	GO:0009651 GO:0009737 GO:0009739 GO:2000377	regulation of reactive oxygen species metabolic process; response to abscisic acid stimulus; response to gibberellin stimulus; response to salt stress
Glyma.06G186300	1.01031	0.000987625	AT1G74920.1|Symbols:ALDH10A8|aldehyde dehydrogenase 10A8|chr1:28139175-28142573 REVERSE LENGTH=501	0	GO:0008152 GO:0009414 GO:0009651 GO:0055114	metabolic process; oxidation-reduction process; response to salt stress; response to water deprivation
Glyma.06G187600	0.913316	0.00093307	AT1G74840.2|Symbols:|Homeodomain-like superfamily protein|chr1:28116201-28117317 REVERSE LENGTH=239	2e-56	GO:0006355 GO:0006612 GO:0009651 GO:0009723 GO:0009733 GO:0009737 GO:0009739 GO:0009751 GO:0009753 GO:0009963 GO:0010363 GO:0046686	positive regulation of flavonoid biosynthetic process; protein targeting to membrane; regulation of plant-type hypersensitive response; regulation of transcription, DNA-dependent; response to abscisic acid stimulus; response to auxin stimulus; response to cadmium ion; response to ethylene stimulus; response to gibberellin stimulus; response to jasmonic acid stimulus; response to salicylic acid st…
Glyma.06G189900	1.13862	5.11e-05	AT5G62670.1|Symbols:AHA11, HA11|H(+)-ATPase 11|chr5:25159495-25164957 FORWARD LENGTH=956	0	GO:0006200 GO:0006754 GO:0006812 GO:0008152	ATP biosynthetic process; ATP catabolic process; cation transport; metabolic process
Glyma.06G191000	-2.59557	8.83e-09	AT5G62550.1|Symbols:|unknown protein; FUNCTIONS IN: molecular_function unknown; INVOLVED IN: biological_process unknown; LOCATED IN: plasma membrane; EXPRESSED IN: 17 plant structures; EXPRESSED DURING: 9 growth stages; Has 14949 Blast hits to 9947 proteins in 971 species: Archae - 43; Bacteria - 3248; Metazoa - 4424; Fungi - 1542; Plants - 562; Viruses - 55; Other Eukaryotes - 5075 (source: NCBI…	7e-49	GO:0008150	biological process
Glyma.06G193800	1.4907	0.00347826	AT1G74670.1|Symbols:|Gibberellin-regulated family protein|chr1:28053378-28053893 FORWARD LENGTH=101	2e-40	GO:0009739 GO:0009740 GO:0009744 GO:0009749 GO:0009750 GO:0010162 GO:0080167	gibberellic acid mediated signaling pathway; response to fructose stimulus; response to gibberellin stimulus; response to glucose stimulus; response to karrikin; response to sucrose stimulus; seed dormancy process
Glyma.06G194600	2.24988	0.000228035	AT3G47510.1|Symbols:|unknown protein; FUNCTIONS IN: molecular_function unknown; INVOLVED IN: biological_process unknown; LOCATED IN: endomembrane system; EXPRESSED IN: 19 plant structures; EXPRESSED DURING: 11 growth stages; Has 15 Blast hits to 15 proteins in 7 species: Archae - 0; Bacteria - 0; Metazoa - 0; Fungi - 0; Plants - 15; Viruses - 0; Other Eukaryotes - 0 (source: NCBI BLink).|chr3:175…	1e-08	GO:0008150	biological process
Glyma.06G196700	2.0409	0.00672388	AT5G61340.1|Symbols:|unknown protein; BEST Arabidopsis thaliana protein match is: unknown protein (TAIR:AT1G26650.1); Has 30201 Blast hits to 17322 proteins in 780 species: Archae - 12; Bacteria - 1396; Metazoa - 17338; Fungi - 3422; Plants - 5037; Viruses - 0; Other Eukaryotes - 2996 (source: NCBI BLink).|chr5:24662064-24663044 REVERSE LENGTH=326	2e-81	GO:0008150	biological process
Glyma.06G199600	1.67631	0.000245114	AT5G61270.1|Symbols:PIF7|phytochrome-interacting factor7|chr5:24638873-24640439 REVERSE LENGTH=366	5e-40	GO:0006355 GO:0009416 GO:0009704	de-etiolation; regulation of transcription, DNA-dependent; response to light stimulus
Glyma.06G202000	-0.980966	0.00851581	AT5G07980.1|Symbols:|dentin sialophosphoprotein-related|chr5:2549432-2554669 REVERSE LENGTH=1501	7e-96	GO:0008150	biological process
Glyma.06G206200	2.22051	0.0012242	AT2G03810.4|Symbols:|18S pre-ribosomal assembly protein gar2-related|chr2:1162703-1164286 FORWARD LENGTH=439	3e-07	GO:0006499	N-terminal protein myristoylation
Glyma.06G206800	-3.02065	1.92e-06	AT3G42660.1|Symbols:|transducin family protein / WD-40 repeat family protein|chr3:14751280-14755701 FORWARD LENGTH=953	0	GO:0006260 GO:0006261 GO:0006270 GO:0006275 GO:0006306 GO:0008150 GO:0008283 GO:0009909 GO:0010389 GO:0016458 GO:0016570 GO:0034968 GO:0048449 GO:0051567 GO:0051726	DNA-dependent DNA replication; DNA methylation; DNA replication; DNA replication initiation; biological process; cell proliferation; floral organ formation; gene silencing; histone H3-K9 methylation; histone lysine methylation; histone modification; regulation of DNA replication; regulation of G2/M transition of mitotic cell cycle; regulation of cell cycle; regulation of flower development
Glyma.06G206900	-1.51435	0.00982718	AT1G18485.1|Symbols:|Pentatricopeptide repeat (PPR) superfamily protein|chr1:6363172-6366084 FORWARD LENGTH=970	0	GO:0008150 GO:0016556	biological process; mRNA modification
Glyma.06G211300	2.26168	2.53e-11	AT1G08510.1|Symbols:FATB|fatty acyl-ACP thioesterases B|chr1:2691546-2693409 REVERSE LENGTH=412	0	GO:0006633 GO:0008152	fatty acid biosynthetic process; metabolic process
Glyma.06G221100	1.21375	0.000191547	AT1G31200.1|Symbols:ATPP2-A9, PP2-A9|phloem protein 2-A9|chr1:11146923-11147678 REVERSE LENGTH=180	5e-32	NA	NA
Glyma.06G222100	-1.12339	0.00181293	AT5G51200.1|Symbols:|Protein of unknown function (DUF3414)|chr5:20804926-20819408 FORWARD LENGTH=1838	0	GO:0008150	biological process
Glyma.06G223300	-2.56233	6.95e-05	AT4G30860.1|Symbols:ASHR3, SDG4|SET domain group 4|chr4:15024546-15027427 FORWARD LENGTH=497	0	GO:0009909 GO:0016458 GO:0034968	gene silencing; histone lysine methylation; regulation of flower development
Glyma.06G229700	3.99292	1.17e-05	AT1G53190.2|Symbols:|RING/U-box superfamily protein|chr1:19838072-19840003 FORWARD LENGTH=494	3e-39	NA	NA
Glyma.06G234500	2.96269	9.49e-08	AT1G53190.2|Symbols:|RING/U-box superfamily protein|chr1:19838072-19840003 FORWARD LENGTH=494	1e-38	NA	NA
Glyma.06G237700	-1.28692	0.00264951	AT5G53920.1|Symbols:|ribosomal protein L11 methyltransferase-related|chr5:21892124-21894087 FORWARD LENGTH=371	6e-115	GO:0006479 GO:0006744	protein methylation; ubiquinone biosynthetic process
Glyma.06G238100	3.20786	1.03e-12	AT1G53160.1|Symbols:SPL4|squamosa promoter binding protein-like 4|chr1:19806478-19807080 FORWARD LENGTH=174	3e-40	GO:0006355 GO:0010321	regulation of transcription, DNA-dependent; regulation of vegetative phase change
Glyma.06G239900	1.4248	0.00546204	AT5G53870.1|Symbols:ENODL1, AtENODL1|early nodulin-like protein 1|chr5:21870033-21871228 REVERSE LENGTH=370	3e-53	NA	NA
Glyma.06G240400	-3.08751	7.39e-06	AT1G53140.1|Symbols:DRP5A|Dynamin related protein 5A|chr1:19799271-19802441 FORWARD LENGTH=817	0	GO:0000280 GO:0000910 GO:0000911 GO:0006260 GO:0006270 GO:0006275 GO:0006306 GO:0006342 GO:0006346 GO:0007000 GO:0008283 GO:0009909 GO:0010389 GO:0016458 GO:0031048 GO:0034968 GO:0051567 GO:0051726	DNA methylation; DNA replication; DNA replication initiation; cell proliferation; chromatin silencing; chromatin silencing by small RNA; cytokinesis; cytokinesis by cell plate formation; gene silencing; histone H3-K9 methylation; histone lysine methylation; methylation-dependent chromatin silencing; nuclear division; nucleolus organization; regulation of DNA replication; regulation of G2/M transi…
Glyma.06G242700	1.81932	9.07e-06	AT1G53035.1|Symbols:|unknown protein; FUNCTIONS IN: molecular_function unknown; INVOLVED IN: biological_process unknown; LOCATED IN: endomembrane system; EXPRESSED IN: 23 plant structures; EXPRESSED DURING: 13 growth stages; BEST Arabidopsis thaliana protein match is: unknown protein (TAIR:AT3G15358.1); Has 49 Blast hits to 49 proteins in 9 species: Archae - 0; Bacteria - 0; Metazoa - 0; Fungi - …	1e-67	GO:0007623 GO:0008150	biological process; circadian rhythm
Glyma.06G242900	1.43101	0.00244086	AT3G15353.1|Symbols:MT3, ATMT3|metallothionein 3|chr3:5180825-5181325 REVERSE LENGTH=69	8e-16	GO:0006612 GO:0006833 GO:0006878 GO:0006970 GO:0007389 GO:0008361 GO:0009651 GO:0009750 GO:0009926 GO:0009963 GO:0010015 GO:0010363 GO:0040007 GO:0046686	auxin polar transport; cellular copper ion homeostasis; growth; pattern specification process; positive regulation of flavonoid biosynthetic process; protein targeting to membrane; regulation of cell size; regulation of plant-type hypersensitive response; response to cadmium ion; response to fructose stimulus; response to osmotic stress; response to salt stress; root morphogenesis; water transport
Glyma.06G262800	1.21412	4.34e-06	AT5G54530.1|Symbols:|Protein of unknown function, DUF538|chr5:22152781-22154201 FORWARD LENGTH=161	3e-57	GO:0008150	biological process
Glyma.06G264700	2.46486	0.00130197	NA	NA	NA	NA
Glyma.06G264800	2.95082	4.74e-06	NA	NA	NA	NA
Glyma.06G265100	1.11333	0.0022937	NA	NA	NA	NA
Glyma.06G268400	1.88443	0.000399634	NA	NA	NA	NA
Glyma.06G270400	-2.84561	1.45e-05	NA	NA	NA	NA
Glyma.06G276900	-0.885198	0.00463218	AT3G58640.2|Symbols:|Mitogen activated protein kinase kinase kinase-related|chr3:21687153-21692675 REVERSE LENGTH=809	0	GO:0006468 GO:0006486	protein glycosylation; protein phosphorylation
Glyma.06G278500	1.77596	0.00530521	AT4G38840.1|Symbols:|SAUR-like auxin-responsive protein family|chr4:18125174-18125473 REVERSE LENGTH=99	2e-30	GO:0009409 GO:0009733 GO:0042742	defense response to bacterium; response to auxin stimulus; response to cold
Glyma.06G283800	1.5514	0.000727894	AT2G42570.1|Symbols:TBL39|TRICHOME BIREFRINGENCE-LIKE 39|chr2:17717498-17719921 REVERSE LENGTH=367	2e-158	GO:0008150	biological process
Glyma.06G284200	-2.89029	0.00295693	AT3G58590.1|Symbols:|Pentatricopeptide repeat (PPR) superfamily protein|chr3:21666262-21668487 FORWARD LENGTH=741	0	GO:0008150	biological process
Glyma.06G284400	-2.65167	0.000191547	NA	NA	NA	NA
Glyma.06G289900	-1.98603	0.00134625	AT2G20590.1|Symbols:|Reticulon family protein|chr2:8867243-8869166 REVERSE LENGTH=431	1e-113	GO:0008150	biological process
Glyma.06G290300	-2.74068	9.14e-09	AT1G03780.2|Symbols:TPX2|targeting protein for XKLP2|chr1:947785-951696 REVERSE LENGTH=758	0	GO:0000226 GO:0000280 GO:0000911 GO:0006270 GO:0006275 GO:0006306 GO:0006342 GO:0008283 GO:0009909 GO:0010389 GO:0016458 GO:0016572 GO:0031047 GO:0034968 GO:0042023 GO:0042127 GO:0045010 GO:0051225 GO:0051258 GO:0051567 GO:0051726	DNA endoreduplication; DNA methylation; DNA replication initiation; actin nucleation; cell proliferation; chromatin silencing; cytokinesis by cell plate formation; gene silencing; gene silencing by RNA; histone H3-K9 methylation; histone lysine methylation; histone phosphorylation; microtubule cytoskeleton organization; nuclear division; protein polymerization; regulation of DNA replication; regu…
Glyma.06G290500	-3.56849	1.43e-08	AT2G20635.1|Symbols:|ATP binding;protein kinases;protein serine/threonine kinases|chr2:8900410-8903384 FORWARD LENGTH=525	0	GO:0006468	protein phosphorylation
Glyma.06G291300	3.67372	2.75e-08	AT5G53390.1|Symbols:|O-acyltransferase (WSD1-like) family protein|chr5:21656951-21659207 REVERSE LENGTH=486	2e-49	GO:0048446	petal morphogenesis
Glyma.06G293200	1.66415	2.23e-07	AT4G28290.1|Symbols:|unknown protein; FUNCTIONS IN: molecular_function unknown; INVOLVED IN: biological_process unknown; LOCATED IN: chloroplast; EXPRESSED IN: 23 plant structures; EXPRESSED DURING: 15 growth stages; Has 45 Blast hits to 45 proteins in 11 species: Archae - 0; Bacteria - 0; Metazoa - 0; Fungi - 0; Plants - 45; Viruses - 0; Other Eukaryotes - 0 (source: NCBI BLink).|chr4:14012032-1…	4e-11	GO:0008150	biological process
Glyma.06G297400	-3.8191	0.0077422	NA	NA	NA	NA
Glyma.06G298400	-2.68052	9.59e-06	AT4G28240.1|Symbols:|Wound-responsive family protein|chr4:13997979-13998239 REVERSE LENGTH=86	9e-08	GO:0008150	biological process
Glyma.06G301200	3.09526	1.49e-10	AT3G09280.1|Symbols:|unknown protein; FUNCTIONS IN: molecular_function unknown; INVOLVED IN: biological_process unknown; LOCATED IN: endomembrane system; EXPRESSED IN: root; Has 31 Blast hits to 31 proteins in 9 species: Archae - 0; Bacteria - 0; Metazoa - 0; Fungi - 0; Plants - 31; Viruses - 0; Other Eukaryotes - 0 (source: NCBI BLink).|chr3:2850920-2851258 REVERSE LENGTH=112	2e-13	GO:0008150	biological process
Glyma.06G301500	1.42832	0.00026867	AT4G15210.1|Symbols:ATBETA-AMY, AT-BETA-AMY, RAM1, BMY1, BAM5|beta-amylase 5|chr4:8666734-8669357 REVERSE LENGTH=498	0	GO:0000272 GO:0005975 GO:0005983 GO:0080027	carbohydrate metabolic process; polysaccharide catabolic process; response to herbivore; starch catabolic process
Glyma.06G303100	2.57927	0.000787075	AT2G46410.1|Symbols:CPC|Homeodomain-like superfamily protein|chr2:19049315-19050185 REVERSE LENGTH=94	3e-15	GO:0001708 GO:0006355 GO:0009751 GO:0009753 GO:0009888 GO:0009913 GO:0010063 GO:0030154	cell differentiation; cell fate specification; epidermal cell differentiation; positive regulation of trichoblast fate specification; regulation of transcription, DNA-dependent; response to jasmonic acid stimulus; response to salicylic acid stimulus; tissue development
Glyma.06G308100	-3.13829	2.4e-06	AT2G32590.1|Symbols:|LOCATED IN: chloroplast; EXPRESSED IN: 17 plant structures; EXPRESSED DURING: 9 growth stages; CONTAINS InterPro DOMAIN/s: Barren (InterPro:IPR008418); Has 467 Blast hits to 447 proteins in 202 species: Archae - 0; Bacteria - 4; Metazoa - 147; Fungi - 168; Plants - 39; Viruses - 1; Other Eukaryotes - 108 (source: NCBI BLink).|chr2:13829420-13833209 REVERSE LENGTH=671	0	GO:0000226 GO:0000911 GO:0006260 GO:0006270 GO:0006275 GO:0006306 GO:0006342 GO:0006346 GO:0008283 GO:0009909 GO:0010389 GO:0016458 GO:0019722 GO:0031047 GO:0031048 GO:0034968 GO:0051567 GO:0051726	DNA methylation; DNA replication; DNA replication initiation; calcium-mediated signaling; cell proliferation; chromatin silencing; chromatin silencing by small RNA; cytokinesis by cell plate formation; gene silencing; gene silencing by RNA; histone H3-K9 methylation; histone lysine methylation; methylation-dependent chromatin silencing; microtubule cytoskeleton organization; regulation of DNA rep…
Glyma.06G310500	-1.49948	0.000171849	AT1G08840.2|Symbols:emb2411|DNA replication helicase, putative|chr1:2829579-2838369 REVERSE LENGTH=1315	0	GO:0006260 GO:0009793	DNA replication; embryo development ending in seed dormancy
Glyma.06G311400	0.783148	0.00179443	AT3G12480.1|Symbols:NF-YC11|nuclear factor Y, subunit C11|chr3:3958065-3960278 FORWARD LENGTH=293	5e-76	GO:0006355	regulation of transcription, DNA-dependent
Glyma.06G313500	3.46703	3.34e-10	AT5G13750.1|Symbols:ZIFL1|zinc induced facilitator-like 1|chr5:4438318-4441289 FORWARD LENGTH=478	0	GO:0009414 GO:0009630 GO:0010540 GO:0048364 GO:0080167 GO:0090333	basipetal auxin transport; gravitropism; regulation of stomatal closure; response to karrikin; response to water deprivation; root development
Glyma.06G314200	1.20648	0.00948922	AT5G04970.1|Symbols:|Plant invertase/pectin methylesterase inhibitor superfamily|chr5:1464262-1467001 REVERSE LENGTH=624	0	GO:0042545	cell wall modification
Glyma.06G316900	-1.33744	1.34e-06	AT5G04620.2|Symbols:ATBIOF, BIOF|biotin F|chr5:1327292-1329934 FORWARD LENGTH=476	0	GO:0009058 GO:0009102	biosynthetic process; biotin biosynthetic process
Glyma.06G317200	2.35827	0.00205143	AT5G61520.1|Symbols:|Major facilitator superfamily protein|chr5:24739358-24741175 REVERSE LENGTH=514	0	GO:0006810 GO:0055085	transmembrane transport; transport
Glyma.06G322000	1.01154	0.0069146	AT5G56170.1|Symbols:LLG1|LORELEI-LIKE-GPI-ANCHORED PROTEIN 1|chr5:22736072-22737108 FORWARD LENGTH=168	2e-59	GO:0008150	biological process
Glyma.06G324200	-3.1772	0.000133559	AT1G71691.2|Symbols:|GDSL-like Lipase/Acylhydrolase superfamily protein|chr1:26949395-26951480 REVERSE LENGTH=384	9e-180	GO:0006629	lipid metabolic process
Glyma.06G324700	-1.62204	1.26e-05	AT1G72040.1|Symbols:|P-loop containing nucleoside triphosphate hydrolases superfamily protein|chr1:27112159-27114248 REVERSE LENGTH=580	0	GO:0006139	nucleobase-containing compound metabolic process
Glyma.07G000500	0.889924	0.00684668	AT1G16720.1|Symbols:HCF173|high chlorophyll fluorescence phenotype 173|chr1:5723161-5726248 FORWARD LENGTH=598	0	GO:0006413 GO:0010155 GO:0010207 GO:0046777	photosystem II assembly; protein autophosphorylation; regulation of proton transport; translational initiation
Glyma.07G002700	-1.17662	0.000561166	AT4G27990.1|Symbols:YLMG1-2, ATYLMG1-2|YGGT family protein|chr4:13923991-13924647 REVERSE LENGTH=218	8e-64	GO:0008150	biological process
Glyma.07G003800	0.908681	0.00529796	AT4G31590.1|Symbols:ATCSLC05, CSLC05, ATCSLC5, CSLC5|Cellulose-synthase-like C5|chr4:15309889-15312336 REVERSE LENGTH=692	0	GO:0042546	cell wall biogenesis
Glyma.07G004200	0.924652	0.0033314	AT3G21190.1|Symbols:|O-fucosyltransferase family protein|chr3:7432579-7434543 REVERSE LENGTH=422	0	NA	NA
Glyma.07G011300	-1.20989	9.95e-06	AT3G13690.1|Symbols:|Protein kinase protein with adenine nucleotide alpha hydrolases-like domain|chr3:4486920-4490011 FORWARD LENGTH=753	0	GO:0006468 GO:0046777	protein autophosphorylation; protein phosphorylation
Glyma.07G011700	4.22955	0.000169839	AT1G73010.1|Symbols:ATPS2, PS2|phosphate starvation-induced gene 2|chr1:27464780-27466180 REVERSE LENGTH=295	1e-103	GO:0008152 GO:0016036 GO:0019375 GO:0045892 GO:0051262	cellular response to phosphate starvation; galactolipid biosynthetic process; metabolic process; negative regulation of transcription, DNA-dependent; protein tetramerization
Glyma.07G014100	1.66512	0.000219163	AT3G16370.1|Symbols:|GDSL-like Lipase/Acylhydrolase superfamily protein|chr3:5556928-5558351 FORWARD LENGTH=353	0	GO:0000038 GO:0000271 GO:0006629 GO:0007389 GO:0008361 GO:0009664 GO:0009825 GO:0009832 GO:0009926 GO:0009932 GO:0010015 GO:0010817 GO:0040007 GO:0042335 GO:0043481 GO:0048767 GO:0071555	anthocyanin accumulation in tissues in response to UV light; auxin polar transport; cell tip growth; cell wall organization; cuticle development; growth; lipid metabolic process; multidimensional cell growth; pattern specification process; plant-type cell wall biogenesis; plant-type cell wall organization; polysaccharide biosynthetic process; regulation of cell size; regulation of hormone levels;…
Glyma.07G015400	-2.58829	1.02e-06	AT4G12540.1|Symbols:|unknown protein; Has 29 Blast hits to 26 proteins in 11 species: Archae - 2; Bacteria - 0; Metazoa - 0; Fungi - 0; Plants - 27; Viruses - 0; Other Eukaryotes - 0 (source: NCBI BLink).|chr4:7429876-7431602 REVERSE LENGTH=461	2e-55	GO:0008150	biological process
Glyma.07G016900	2.40045	0.00014846	NA	NA	NA	NA
Glyma.07G017600	-1.60905	2.75e-07	AT5G06220.2|Symbols:|LETM1-like protein|chr5:1880049-1885366 FORWARD LENGTH=909	2e-36	GO:0008150	biological process
Glyma.07G018000	0.873084	0.0013391	AT3G16240.1|Symbols:DELTA-TIP, TIP2;1, DELTA-TIP1, AQP1, ATTIP2;1|delta tonoplast integral protein|chr3:5505534-5506788 FORWARD LENGTH=250	7e-139	GO:0006810 GO:0006816 GO:0006833 GO:0007030 GO:0009651 GO:0015840 GO:0030003 GO:0055085 GO:0070838	Golgi organization; calcium ion transport; cellular cation homeostasis; divalent metal ion transport; response to salt stress; transmembrane transport; transport; urea transport; water transport
Glyma.07G018500	-0.742595	0.00632027	AT4G29100.1|Symbols:|basic helix-loop-helix (bHLH) DNA-binding superfamily protein|chr4:14341140-14344575 FORWARD LENGTH=407	1e-67	GO:0006355	regulation of transcription, DNA-dependent
Glyma.07G021100	-2.09661	5.64e-05	AT2G38620.2|Symbols:CDKB1;2|cyclin-dependent kinase B1;2|chr2:16152551-16153866 FORWARD LENGTH=311	0	GO:0006468 GO:0051726	protein phosphorylation; regulation of cell cycle
Glyma.07G028500	-0.841858	0.00934455	AT1G15690.1|Symbols:AVP1, ATAVP3, AVP-3, AtVHP1;1|Inorganic H pyrophosphatase family protein|chr1:5399115-5402185 FORWARD LENGTH=770	0	GO:0009414 GO:0009651 GO:0009926 GO:0010248 GO:0015992 GO:0048366	auxin polar transport; establishment or maintenance of transmembrane electrochemical gradient; leaf development; proton transport; response to salt stress; response to water deprivation
Glyma.07G030500	3.27991	0.00291005	AT5G20190.1|Symbols:|Tetratricopeptide repeat (TPR)-like superfamily protein|chr5:6814093-6815171 FORWARD LENGTH=290	3e-37	GO:0008150	biological process
Glyma.07G033200	-3.16886	1.32e-10	AT3G15570.1|Symbols:|Phototropic-responsive NPH3 family protein|chr3:5270267-5271700 REVERSE LENGTH=452	4e-175	GO:0000023 GO:0009416 GO:0019252	maltose metabolic process; response to light stimulus; starch biosynthetic process
Glyma.07G034100	-2.13546	0.000141012	AT1G80370.1|Symbols:CYCA2;4|Cyclin A2;4|chr1:30214694-30216861 FORWARD LENGTH=461	3e-166	GO:0000079 GO:0006275 GO:0008283 GO:0010374 GO:0010389 GO:0042023 GO:0043161 GO:0043248 GO:0051510 GO:0051726 GO:0051788	DNA endoreduplication; cell proliferation; proteasomal ubiquitin-dependent protein catabolic process; proteasome assembly; regulation of DNA replication; regulation of G2/M transition of mitotic cell cycle; regulation of cell cycle; regulation of cyclin-dependent protein serine/threonine kinase activity; regulation of unidimensional cell growth; response to misfolded protein; stomatal complex dev…
Glyma.07G035600	-1.26494	0.000839884	AT1G67120.1|Symbols:|ATPases;nucleotide binding;ATP binding;nucleoside-triphosphatases;transcription factor binding|chr1:25069727-25095526 REVERSE LENGTH=5393	0	GO:0006094 GO:0007010 GO:0009553 GO:0010498	cytoskeleton organization; embryo sac development; gluconeogenesis; proteasomal protein catabolic process
Glyma.07G036200	1.41799	0.000674251	AT1G72830.1|Symbols:HAP2C, ATHAP2C, NF-YA3|nuclear factor Y, subunit A3|chr1:27405699-27407088 REVERSE LENGTH=340	1e-70	GO:0006355 GO:0045892	negative regulation of transcription, DNA-dependent; regulation of transcription, DNA-dependent
Glyma.07G037300	0.824613	0.00484149	AT1G17455.2|Symbols:ELF4-L4|ELF4-like 4|chr1:5997932-5998276 FORWARD LENGTH=114	4e-51	GO:0008150 GO:0009648	biological process; photoperiodism
Glyma.07G040400	1.36961	0.00163514	AT1G72510.2|Symbols:|Protein of unknown function (DUF1677)|chr1:27303906-27304403 FORWARD LENGTH=165	6e-63	GO:0008150	biological process
Glyma.07G043100	1.68114	2.73e-05	AT3G14200.1|Symbols:|Chaperone DnaJ-domain superfamily protein|chr3:4712881-4714361 REVERSE LENGTH=230	6e-55	GO:0006457	protein folding
Glyma.07G047800	1.11994	0.00530521	AT5G54130.2|Symbols:|Calcium-binding endonuclease/exonuclease/phosphatase family|chr5:21962900-21965279 FORWARD LENGTH=436	0	NA	NA
Glyma.07G051400	1.40962	0.00418504	AT1G01180.1|Symbols:|S-adenosyl-L-methionine-dependent methyltransferases superfamily protein|chr1:75633-76556 FORWARD LENGTH=307	2e-132	GO:0008610	lipid biosynthetic process
Glyma.07G051700	1.48186	0.00576604	AT2G46690.1|Symbols:|SAUR-like auxin-responsive protein family|chr2:19180904-19181269 FORWARD LENGTH=121	2e-45	GO:0006816 GO:0009733	calcium ion transport; response to auxin stimulus
Glyma.07G051900	0.767949	0.00687294	NA	NA	NA	NA
Glyma.07G054700	-2.67925	4.61e-07	AT4G00950.1|Symbols:MEE47|Protein of unknown function (DUF688)|chr4:405984-407087 REVERSE LENGTH=291	2e-23	GO:0006355 GO:0009793	embryo development ending in seed dormancy; regulation of transcription, DNA-dependent
Glyma.07G055300	-1.52486	5.93e-05	AT1G01300.1|Symbols:|Eukaryotic aspartyl protease family protein|chr1:117065-118522 FORWARD LENGTH=485	0	GO:0006508 GO:0009664 GO:0042545 GO:0080167	cell wall modification; plant-type cell wall organization; proteolysis; response to karrikin
Glyma.07G056600	-1.44172	0.0016931	AT5G63630.1|Symbols:|P-loop containing nucleoside triphosphate hydrolases superfamily protein|chr5:25472598-25476402 REVERSE LENGTH=788	0	NA	NA
Glyma.07G057100	1.85063	0.000148825	AT5G08391.1|Symbols:|Protein of unknown function (DUF 3339)|chr5:2699357-2699566 FORWARD LENGTH=69	5e-32	GO:0008150	biological process
Glyma.07G057300	-2.4961	1.89e-08	AT1G01370.2|Symbols:HTR12, CENH3|Histone superfamily protein|chr1:143773-145400 FORWARD LENGTH=178	6e-48	GO:0000911 GO:0006270 GO:0006275 GO:0006334 GO:0006346 GO:0007126 GO:0008283 GO:0009567 GO:0009909 GO:0010389 GO:0016458 GO:0031048 GO:0034968 GO:0048451 GO:0048453 GO:0051301 GO:0051307 GO:0051567 GO:0051726	DNA replication initiation; cell division; cell proliferation; chromatin silencing by small RNA; cytokinesis by cell plate formation; double fertilization forming a zygote and endosperm; gene silencing; histone H3-K9 methylation; histone lysine methylation; meiosis; meiotic chromosome separation; methylation-dependent chromatin silencing; nucleosome assembly; petal formation; regulation of DNA re…
Glyma.07G057600	1.79637	5.33e-07	AT1G01430.1|Symbols:TBL25|TRICHOME BIREFRINGENCE-LIKE 25|chr1:156953-158536 REVERSE LENGTH=456	1e-174	GO:0008150	biological process
Glyma.07G058200	0.974297	0.000156805	AT2G46340.1|Symbols:SPA1|SPA (suppressor of phyA-105) protein family|chr2:19022572-19026821 REVERSE LENGTH=1029	0	GO:0006281 GO:0006468 GO:0009585 GO:0009640 GO:0009658 GO:0010017 GO:0010100 GO:0010114 GO:0010218 GO:0048575 GO:0048608 GO:2000028	DNA repair; chloroplast organization; negative regulation of photomorphogenesis; photomorphogenesis; protein phosphorylation; red, far-red light phototransduction; red or far-red light signaling pathway; regulation of photoperiodism, flowering; reproductive structure development; response to far red light; response to red light; short-day photoperiodism, flowering
Glyma.07G059700	-1.25587	0.00522642	AT4G12740.1|Symbols:|HhH-GPD base excision DNA repair family protein|chr4:7494578-7497596 REVERSE LENGTH=630	6e-170	GO:0006281 GO:0006284 GO:0006306	DNA methylation; DNA repair; base-excision repair
Glyma.07G060900	0.974583	0.00143267	AT2G04520.1|Symbols:|Nucleic acid-binding, OB-fold-like protein|chr2:1574802-1575239 REVERSE LENGTH=145	1e-86	GO:0006413	translational initiation
Glyma.07G063300	-0.897057	0.00206566	AT4G27220.1|Symbols:|NB-ARC domain-containing disease resistance protein|chr4:13633953-13636712 REVERSE LENGTH=919	3e-52	GO:0006952	defense response
Glyma.07G068300	1.6933	6.22e-07	AT3G11750.1|Symbols:FOLB1|Dihydroneopterin aldolase|chr3:3715071-3715904 REVERSE LENGTH=146	1e-52	GO:0006760 GO:0010304	PSII associated light-harvesting complex II catabolic process; folic acid-containing compound metabolic process
Glyma.07G069500	0.959113	0.00873774	AT2G45970.1|Symbols:CYP86A8, LCR|cytochrome P450, family 86, subfamily A, polypeptide 8|chr2:18912548-18914161 REVERSE LENGTH=537	0	GO:0006631 GO:0055114	fatty acid metabolic process; oxidation-reduction process
Glyma.07G070200	-2.51488	0.000419609	AT1G20930.1|Symbols:CDKB2;2|cyclin-dependent kinase B2;2|chr1:7292752-7294664 REVERSE LENGTH=315	0	GO:0000087 GO:0000280 GO:0000911 GO:0006275 GO:0006468 GO:0007346 GO:0008283 GO:0009755 GO:0009934 GO:0010389 GO:0042023 GO:0046777 GO:0051225	DNA endoreduplication; M phase of mitotic cell cycle; cell proliferation; cytokinesis by cell plate formation; hormone-mediated signaling pathway; nuclear division; protein autophosphorylation; protein phosphorylation; regulation of DNA replication; regulation of G2/M transition of mitotic cell cycle; regulation of meristem structural organization; regulation of mitotic cell cycle; spindle assemb…
Glyma.07G072300	-0.856245	0.00393998	AT2G45850.2|Symbols:|AT hook motif DNA-binding family protein|chr2:18871901-18873457 REVERSE LENGTH=348	2e-104	GO:0008150 GO:0010103	biological process; stomatal complex morphogenesis
Glyma.07G074600	-2.78537	3e-06	AT3G61220.1|Symbols:|NAD(P)-binding Rossmann-fold superfamily protein|chr3:22663025-22664316 FORWARD LENGTH=296	4e-120	GO:0006952 GO:0008152 GO:0009744 GO:0009813 GO:0010224 GO:0055114 GO:0080167	defense response; flavonoid biosynthetic process; metabolic process; oxidation-reduction process; response to UV-B; response to karrikin; response to sucrose stimulus
Glyma.07G075300	1.09585	0.00621296	AT1G63220.2|Symbols:|Calcium-dependent lipid-binding (CaLB domain) family protein|chr1:23449017-23450244 FORWARD LENGTH=133	7e-43	GO:0008150	biological process
Glyma.07G076000	-0.904068	0.00107461	AT2G31890.1|Symbols:ATRAP, RAP|RAP|chr2:13557100-13559715 REVERSE LENGTH=671	0	GO:0008150	biological process
Glyma.07G078200	-3.30935	9.78e-07	AT2G45720.2|Symbols:|ARM repeat superfamily protein|chr2:18834468-18836129 FORWARD LENGTH=553	0	GO:0008150 GO:0010413 GO:0045492	biological process; glucuronoxylan metabolic process; xylan biosynthetic process
Glyma.07G079500	0.914146	0.00472013	AT4G00770.1|Symbols:|unknown protein; Has 127 Blast hits to 120 proteins in 33 species: Archae - 0; Bacteria - 2; Metazoa - 6; Fungi - 8; Plants - 62; Viruses - 3; Other Eukaryotes - 46 (source: NCBI BLink).|chr4:331195-333050 FORWARD LENGTH=440	1e-41	GO:0008150	biological process
Glyma.07G084200	-2.22043	0.000527694	AT4G28950.1|Symbols:ARAC7, ATROP9, ATRAC7, RAC7, ROP9|RHO-related protein from plants 9|chr4:14278289-14279705 FORWARD LENGTH=209	1e-138	GO:0006184 GO:0007015 GO:0007165 GO:0007264 GO:0015031	GTP catabolic process; actin filament organization; protein transport; signal transduction; small GTPase mediated signal transduction
Glyma.07G085100	-1.48185	1.06e-06	AT2G46225.3|Symbols:ABIL1|ABI-1-like 1|chr2:18982113-18984074 FORWARD LENGTH=286	1e-24	GO:0010090 GO:0045010	actin nucleation; trichome morphogenesis
Glyma.07G085800	0.976184	0.00489319	AT3G24530.1|Symbols:|AAA-type ATPase family protein / ankyrin repeat family protein|chr3:8945678-8947786 REVERSE LENGTH=481	0	GO:0019538	protein metabolic process
Glyma.07G087700	-2.73898	3.89e-05	AT3G24495.1|Symbols:MSH7, MSH6-2, ATMSH7|MUTS homolog 7|chr3:8912418-8918086 REVERSE LENGTH=1109	0	GO:0000710 GO:0000911 GO:0006200 GO:0006260 GO:0006270 GO:0006275 GO:0006298 GO:0006306 GO:0007067 GO:0007126 GO:0007129 GO:0007131 GO:0008283 GO:0009411 GO:0009909 GO:0010389 GO:0010564 GO:0016458 GO:0034968 GO:0043570 GO:0045910 GO:0051567 GO:0051726	ATP catabolic process; DNA methylation; DNA replication; DNA replication initiation; cell proliferation; cytokinesis by cell plate formation; gene silencing; histone H3-K9 methylation; histone lysine methylation; maintenance of DNA repeat elements; meiosis; meiotic mismatch repair; mismatch repair; mitosis; negative regulation of DNA recombination; reciprocal meiotic recombination; regulation of …
Glyma.07G088000	-2.43463	4.91e-09	NA	NA	NA	NA
Glyma.07G088300	1.19776	0.000535648	AT3G24480.1|Symbols:|Leucine-rich repeat (LRR) family protein|chr3:8901154-8902638 REVERSE LENGTH=494	0	NA	NA
Glyma.07G088400	1.52332	2.91e-05	AT3G24460.1|Symbols:|Serinc-domain containing serine and sphingolipid biosynthesis protein|chr3:8886160-8889717 REVERSE LENGTH=409	0	NA	NA
Glyma.07G089300	2.28367	6.15e-05	AT3G24420.1|Symbols:|alpha/beta-Hydrolases superfamily protein|chr3:8863111-8864883 REVERSE LENGTH=273	6e-102	GO:0008150	biological process
Glyma.07G094000	3.16533	0.00957598	NA	NA	NA	NA
Glyma.07G096500	-2.4102	2.48e-05	AT1G18370.1|Symbols:HIK, ATNACK1, NACK1|ATP binding microtubule motor family protein|chr1:6319732-6323820 REVERSE LENGTH=974	0	GO:0000226 GO:0000910 GO:0000911 GO:0007018 GO:0008283 GO:0009555 GO:0009558 GO:0010583 GO:0016572 GO:0048229	cell proliferation; cytokinesis; cytokinesis by cell plate formation; embryo sac cellularization; gametophyte development; histone phosphorylation; microtubule-based movement; microtubule cytoskeleton organization; pollen development; response to cyclopentenone
Glyma.07G098000	-6.88097	4.31e-05	NA	NA	NA	NA
Glyma.07G099300	1.85266	0.000132468	NA	NA	NA	NA
Glyma.07G100400	-2.2833	3.16e-05	AT3G18050.1|Symbols:|unknown protein; BEST Arabidopsis thaliana protein match is: unknown protein (TAIR:AT4G28100.1); Has 67 Blast hits to 66 proteins in 12 species: Archae - 0; Bacteria - 0; Metazoa - 0; Fungi - 0; Plants - 67; Viruses - 0; Other Eukaryotes - 0 (source: NCBI BLink).|chr3:6180931-6182593 FORWARD LENGTH=335	6e-108	GO:0008150 GO:0009740 GO:0010162	biological process; gibberellic acid mediated signaling pathway; seed dormancy process
Glyma.07G100500	-1.28564	0.00127835	AT3G18080.1|Symbols:BGLU44|B-S glucosidase 44|chr3:6191586-6194124 FORWARD LENGTH=512	0	GO:0005975	carbohydrate metabolic process
Glyma.07G100600	-2.87324	0.00086292	AT1G18090.1|Symbols:|5'-3' exonuclease family protein|chr1:6224539-6227715 FORWARD LENGTH=577	0	GO:0006281	DNA repair
Glyma.07G101700	-1.41183	0.00244057	NA	NA	NA	NA
Glyma.07G102100	-1.6982	1.89e-05	AT1G48570.1|Symbols:|zinc finger (Ran-binding) family protein|chr1:17955455-17957661 REVERSE LENGTH=455	1e-122	GO:0009220	pyrimidine ribonucleotide biosynthetic process
Glyma.07G104200	0.800737	0.00936903	AT1G18300.1|Symbols:atnudt4, NUDT4|nudix hydrolase homolog 4|chr1:6299841-6300799 FORWARD LENGTH=207	5e-71	NA	NA
Glyma.07G105000	-4.03896	1.97e-05	AT1G80190.1|Symbols:PSF1|partner of SLD five 1|chr1:30159476-30161115 FORWARD LENGTH=201	3e-96	GO:0006261 GO:0006270	DNA-dependent DNA replication; DNA replication initiation
Glyma.07G107200	-2.23185	0.00629941	AT5G42780.1|Symbols:AtHB27, HB27, ZHD13|homeobox protein 27|chr5:17154841-17155569 FORWARD LENGTH=242	2e-32	NA	NA
Glyma.07G108100	-0.816351	0.00429432	AT4G01037.1|Symbols:WTF1, AtWTF1|Ubiquitin carboxyl-terminal hydrolase family protein|chr4:451444-453030 REVERSE LENGTH=528	0	NA	NA
Glyma.07G115800	-3.33769	1.91e-09	AT4G16970.1|Symbols:|Protein kinase superfamily protein|chr4:9551516-9555766 REVERSE LENGTH=889	7e-177	GO:0006468 GO:0045727 GO:0046777	positive regulation of translation; protein autophosphorylation; protein phosphorylation
Glyma.07G116700	1.55113	0.00291213	AT2G22760.1|Symbols:|basic helix-loop-helix (bHLH) DNA-binding superfamily protein|chr2:9678012-9679165 FORWARD LENGTH=295	2e-42	GO:0006355	regulation of transcription, DNA-dependent
Glyma.07G118800	-1.0359	0.000349077	AT1G18450.1|Symbols:ATARP4, ARP4|actin-related protein 4|chr1:6348199-6351766 FORWARD LENGTH=441	0	GO:0000003 GO:0000398 GO:0006306 GO:0006312 GO:0006325 GO:0006342 GO:0006346 GO:0007131 GO:0007267 GO:0009560 GO:0009616 GO:0009640 GO:0009793 GO:0009845 GO:0009855 GO:0009909 GO:0009933 GO:0010014 GO:0010050 GO:0010073 GO:0010090 GO:0010162 GO:0010182 GO:0010228 GO:0010267 GO:0010638 GO:0016246 GO:0016567 GO:0016572 GO:0019915 GO:0031048 GO:0033044 GO:0035196 GO:0048235 GO:0048573 GO:0048574 GO:…	DNA methylation; RNA interference; cell-cell signaling; chromatin organization; chromatin silencing; chromatin silencing by small RNA; determination of bilateral symmetry; embryo development ending in seed dormancy; embryo sac egg cell differentiation; histone H3-K9 methylation; histone phosphorylation; lipid storage; long-day photoperiodism, flowering; mRNA splicing, via spliceosome; meristem in…
Glyma.07G119800	-2.23546	0.00039662	AT1G02180.1|Symbols:|ferredoxin-related|chr1:413619-414505 REVERSE LENGTH=226	1e-83	GO:0008150	biological process
Glyma.07G120400	-1.1927	0.000397787	AT3G60210.1|Symbols:|GroES-like family protein|chr3:22251443-22252709 REVERSE LENGTH=138	4e-60	GO:0006457	protein folding
Glyma.07G120500	-1.59429	0.00224645	AT2G44640.1|Symbols:|FUNCTIONS IN: molecular_function unknown; INVOLVED IN: biological_process unknown; LOCATED IN: mitochondrion, chloroplast, plasma membrane, plastid, chloroplast envelope; EXPRESSED IN: 23 plant structures; EXPRESSED DURING: 13 growth stages; CONTAINS InterPro DOMAIN/s: Protein of unknown function DUF3769 (InterPro:IPR022244); BEST Arabidopsis thaliana protein match is: pigmen…	3e-162	GO:0008150	biological process
Glyma.07G121000	0.914329	0.00229654	AT5G26667.3|Symbols:PYR6|P-loop containing nucleoside triphosphate hydrolases superfamily protein|chr5:9276659-9278091 FORWARD LENGTH=202	6e-122	GO:0006139 GO:0009173 GO:0046939	nucleobase-containing compound metabolic process; nucleotide phosphorylation; pyrimidine ribonucleoside monophosphate metabolic process
Glyma.07G125500	-1.71022	0.00264545	NA	NA	NA	NA
Glyma.07G128700	-1.12334	0.00127295	AT5G56780.1|Symbols:ATET2, ET2|effector of transcription2|chr5:22964384-22966241 REVERSE LENGTH=483	2e-91	GO:2000033	regulation of seed dormancy process
Glyma.07G132100	-2.14467	0.00959489	AT5G02370.1|Symbols:|ATP binding microtubule motor family protein|chr5:503444-506388 FORWARD LENGTH=628	0	GO:0006275 GO:0006281 GO:0007018 GO:0009909 GO:0010389 GO:0016570 GO:0048449	DNA repair; floral organ formation; histone modification; microtubule-based movement; regulation of DNA replication; regulation of G2/M transition of mitotic cell cycle; regulation of flower development
Glyma.07G133500	1.36862	2.57e-05	AT5G02230.2|Symbols:|Haloacid dehalogenase-like hydrolase (HAD) superfamily protein|chr5:449132-450507 FORWARD LENGTH=280	2e-137	GO:0008152	metabolic process
Glyma.07G133700	-3.91818	6.95e-09	AT5G43290.1|Symbols:WRKY49, ATWRKY49|WRKY DNA-binding protein 49|chr5:17371987-17373083 REVERSE LENGTH=274	4e-54	GO:0006355	regulation of transcription, DNA-dependent
Glyma.07G138900	5.65665	9.45e-14	AT1G52240.2|Symbols:ATROPGEF11, ROPGEF11, PIRF1|RHO guanyl-nucleotide exchange factor 11|chr1:19458844-19459235 REVERSE LENGTH=94	1e-27	GO:0000226 GO:0007017 GO:0009860 GO:0048364 GO:0080147	microtubule-based process; microtubule cytoskeleton organization; pollen tube growth; root development; root hair cell development
Glyma.07G140000	-2.10904	0.00114331	AT3G09270.1|Symbols:ATGSTU8, GSTU8|glutathione S-transferase TAU 8|chr3:2848407-2849226 REVERSE LENGTH=224	8e-80	GO:0006635 GO:0009407 GO:0010583 GO:0043161 GO:0046686 GO:0051788 GO:0080129	fatty acid beta-oxidation; proteasomal ubiquitin-dependent protein catabolic process; proteasome core complex assembly; response to cadmium ion; response to cyclopentenone; response to misfolded protein; toxin catabolic process
Glyma.07G144800	-2.9362	6.12e-09	AT3G09080.1|Symbols:|Transducin/WD40 repeat-like superfamily protein|chr3:2776259-2781785 REVERSE LENGTH=1026	2e-175	NA	NA
Glyma.07G144900	-1.81337	0.00262956	AT3G09070.1|Symbols:|Protein of unknown function (DUF740)|chr3:2768880-2770937 REVERSE LENGTH=685	9e-114	GO:0010088 GO:0010233 GO:0010588 GO:0022622	cotyledon vascular tissue pattern formation; phloem development; phloem transport; root system development
Glyma.07G146400	-1.2409	0.00405123	AT5G01220.1|Symbols:SQD2|sulfoquinovosyldiacylglycerol 2|chr5:86907-89885 REVERSE LENGTH=510	0	GO:0006636 GO:0009058 GO:0009247 GO:0015995 GO:0016036 GO:0016117 GO:0019288 GO:0019375 GO:0019761 GO:0046506	biosynthetic process; carotenoid biosynthetic process; cellular response to phosphate starvation; chlorophyll biosynthetic process; galactolipid biosynthetic process; glucosinolate biosynthetic process; glycolipid biosynthetic process; isopentenyl diphosphate biosynthetic process, mevalonate-independent pathway; sulfolipid biosynthetic process; unsaturated fatty acid biosynthetic process
Glyma.07G146800	1.20519	0.0015294	AT2G38110.1|Symbols:ATGPAT6, GPAT6|glycerol-3-phosphate acyltransferase 6|chr2:15952816-15955364 REVERSE LENGTH=501	0	GO:0006655 GO:0008152 GO:0009908 GO:0010143	cutin biosynthetic process; flower development; metabolic process; phosphatidylglycerol biosynthetic process
Glyma.07G155500	1.13493	0.00720769	AT2G38310.1|Symbols:PYL4, RCAR10|PYR1-like 4|chr2:16050251-16050874 FORWARD LENGTH=207	2e-78	GO:0009738	abscisic acid mediated signaling pathway
Glyma.07G159700	-2.67564	0.000377255	AT2G33560.2|Symbols:BUBR1|BUB1-related (BUB1: budding uninhibited by benzymidazol 1)|chr2:14213810-14215918 REVERSE LENGTH=396	2e-146	GO:0000226 GO:0000911 GO:0006270 GO:0006275 GO:0007094 GO:0008283 GO:0048451 GO:0048453 GO:0051726	DNA replication initiation; cell proliferation; cytokinesis by cell plate formation; microtubule cytoskeleton organization; mitotic spindle assembly checkpoint; petal formation; regulation of DNA replication; regulation of cell cycle; sepal formation
Glyma.07G164900	-2.20742	0.00250753	AT2G01440.1|Symbols:|DEAD/DEAH box RNA helicase family protein _x0001_|chr2:193950-199056 REVERSE LENGTH=973	2e-92	GO:0006281 GO:0006310	DNA recombination; DNA repair
Glyma.07G165200	-0.820705	0.00328713	AT2G43630.1|Symbols:|FUNCTIONS IN: molecular_function unknown; INVOLVED IN: biological_process unknown; LOCATED IN: chloroplast thylakoid membrane, chloroplast, nucleus, chloroplast envelope; EXPRESSED IN: 22 plant structures; EXPRESSED DURING: 13 growth stages; BEST Arabidopsis thaliana protein match is: glycine-rich protein (TAIR:AT3G59640.2); Has 67 Blast hits to 67 proteins in 20 species: Arc…	2e-57	GO:0006457 GO:0008150 GO:0009408 GO:0009644 GO:0034976 GO:0042542	biological process; protein folding; response to endoplasmic reticulum stress; response to heat; response to high light intensity; response to hydrogen peroxide
Glyma.07G165300	1.58889	0.00320883	AT1G23040.1|Symbols:|hydroxyproline-rich glycoprotein family protein|chr1:8165025-8165459 FORWARD LENGTH=144	6e-10	GO:0008150	biological process
Glyma.07G166400	-1.18325	0.00139485	AT2G01590.1|Symbols:CRR3|chlororespiratory reduction 3|chr2:266675-267379 FORWARD LENGTH=174	2e-31	GO:0009773	photosynthetic electron transport in photosystem I
Glyma.07G167000	1.68904	0.000485615	NA	NA	NA	NA
Glyma.07G169400	-2.07007	0.0048138	NA	NA	NA	NA
Glyma.07G171100	-0.95058	0.00506957	AT2G01755.1|Symbols:|unknown protein; FUNCTIONS IN: molecular_function unknown; INVOLVED IN: biological_process unknown; LOCATED IN: chloroplast; Has 120 Blast hits to 120 proteins in 52 species: Archae - 0; Bacteria - 80; Metazoa - 0; Fungi - 0; Plants - 24; Viruses - 0; Other Eukaryotes - 16 (source: NCBI BLink).|chr2:332249-332770 REVERSE LENGTH=173	2e-06	GO:0008150	biological process
Glyma.07G178800	-1.67169	0.000110552	AT2G15820.1|Symbols:OTP51|endonucleases|chr2:6888734-6891360 REVERSE LENGTH=849	0	GO:0000373 GO:0045292 GO:0048564	Group II intron splicing; mRNA cis splicing, via spliceosome; photosystem I assembly
Glyma.07G179700	-0.969313	0.00843663	AT2G19940.2|Symbols:|oxidoreductases, acting on the aldehyde or oxo group of donors, NAD or NADP as acceptor;copper ion binding|chr2:8613168-8615649 FORWARD LENGTH=401	0	GO:0006520 GO:0006526 GO:0008652 GO:0046686 GO:0048481 GO:0055114	arginine biosynthetic process; cellular amino acid biosynthetic process; cellular amino acid metabolic process; ovule development; oxidation-reduction process; response to cadmium ion
Glyma.07G180700	-6.05995	0.00047966	AT3G60290.1|Symbols:|2-oxoglutarate (2OG) and Fe(II)-dependent oxygenase superfamily protein|chr3:22282662-22284414 FORWARD LENGTH=357	5e-38	GO:0009058 GO:0055114 GO:0080167	biosynthetic process; oxidation-reduction process; response to karrikin
Glyma.07G181200	1.85894	1.49e-05	NA	NA	NA	NA
Glyma.07G185100	-1.32735	0.00866109	AT4G33670.1|Symbols:|NAD(P)-linked oxidoreductase superfamily protein|chr4:16169670-16171446 REVERSE LENGTH=319	2e-64	GO:0019853	L-ascorbic acid biosynthetic process
Glyma.07G186700	-2.88643	9.51e-08	AT4G21270.1|Symbols:ATK1, KATA, KATAP|kinesin 1|chr4:11329579-11333884 REVERSE LENGTH=793	0	GO:0000226 GO:0000911 GO:0006275 GO:0006306 GO:0006342 GO:0006346 GO:0007018 GO:0009909 GO:0009971 GO:0010389 GO:0016570 GO:0031047 GO:0031048 GO:0048449 GO:0051567	DNA methylation; anastral spindle assembly involved in male meiosis; chromatin silencing; chromatin silencing by small RNA; cytokinesis by cell plate formation; floral organ formation; gene silencing by RNA; histone H3-K9 methylation; histone modification; methylation-dependent chromatin silencing; microtubule-based movement; microtubule cytoskeleton organization; regulation of DNA replication; r…
Glyma.07G189000	1.56303	9.04e-05	AT4G05150.1|Symbols:|Octicosapeptide/Phox/Bem1p family protein|chr4:2660339-2662675 FORWARD LENGTH=477	2e-100	GO:0046777 GO:0048767	protein autophosphorylation; root hair elongation
Glyma.07G189500	-0.812046	0.00880912	AT1G11260.1|Symbols:STP1, ATSTP1|sugar transporter 1|chr1:3777460-3780133 FORWARD LENGTH=522	0	GO:0009627 GO:0015749 GO:0031347	monosaccharide transport; regulation of defense response; systemic acquired resistance
Glyma.07G189900	0.91431	0.00601353	AT4G05020.1|Symbols:NDB2|NAD(P)H dehydrogenase B2|chr4:2572752-2576222 FORWARD LENGTH=582	0	GO:0055114	oxidation-reduction process
Glyma.07G191700	1.75955	0.000617742	AT1G11170.1|Symbols:|Protein of unknown function (DUF707)|chr1:3741724-3744459 FORWARD LENGTH=438	0	GO:0008150	biological process
Glyma.07G201900	-1.34845	0.00610039	AT3G02400.1|Symbols:|SMAD/FHA domain-containing protein _x0001_|chr3:489830-491587 FORWARD LENGTH=585	2e-34	GO:0006302 GO:0006355 GO:0010332	double-strand break repair; regulation of transcription, DNA-dependent; response to gamma radiation
Glyma.07G202500	-4.62094	2.43e-10	AT5G65360.1|Symbols:|Histone superfamily protein|chr5:26120099-26120509 REVERSE LENGTH=136	5e-94	GO:0006334	nucleosome assembly
Glyma.07G204500	-2.30989	2.26e-05	AT4G18490.2|Symbols:|unknown protein; FUNCTIONS IN: molecular_function unknown; INVOLVED IN: biological_process unknown; LOCATED IN: cellular_component unknown; EXPRESSED IN: shoot, shoot apex, embryo, flower, seed; EXPRESSED DURING: petal differentiation and expansion stage, E expanded cotyledon stage; Has 30201 Blast hits to 17322 proteins in 780 species: Archae - 12; Bacteria - 1396; Metazoa -…	3e-27	GO:0008150	biological process
Glyma.07G207400	-2.04923	0.00528564	AT3G59680.2|Symbols:|unknown protein; FUNCTIONS IN: molecular_function unknown; INVOLVED IN: biological_process unknown; LOCATED IN: endomembrane system; EXPRESSED IN: 17 plant structures; EXPRESSED DURING: 13 growth stages; Has 34 Blast hits to 34 proteins in 10 species: Archae - 0; Bacteria - 0; Metazoa - 0; Fungi - 0; Plants - 34; Viruses - 0; Other Eukaryotes - 0 (source: NCBI BLink).|chr3:22…	2e-56	GO:0008150	biological process
Glyma.07G208700	-2.04191	7.39e-06	AT2G15890.1|Symbols:MEE14|maternal effect embryo arrest 14|chr2:6921196-6921978 REVERSE LENGTH=203	1e-63	GO:0009793 GO:0050832	defense response to fungus; embryo development ending in seed dormancy
Glyma.07G209300	-2.442	1.37e-05	AT3G19050.1|Symbols:POK2|phragmoplast orienting kinesin 2|chr3:6578047-6590106 FORWARD LENGTH=2771	0	GO:0000910 GO:0007018	cytokinesis; microtubule-based movement
Glyma.07G210800	-0.782832	0.00252751	AT3G19130.1|Symbols:ATRBP47B, RBP47B|RNA-binding protein 47B|chr3:6611398-6613823 REVERSE LENGTH=435	6e-172	GO:0042991	transcription factor import into nucleus
Glyma.07G213200	-1.03966	0.00139326	AT4G34020.1|Symbols:|Class I glutamine amidotransferase-like superfamily protein|chr4:16298553-16300897 REVERSE LENGTH=472	3e-176	GO:0009658	chloroplast organization
Glyma.07G216800	2.22039	1.34e-06	AT1G23040.1|Symbols:|hydroxyproline-rich glycoprotein family protein|chr1:8165025-8165459 FORWARD LENGTH=144	2e-13	GO:0008150	biological process
Glyma.07G220000	-3.4736	9.93e-05	AT4G18340.1|Symbols:|Glycosyl hydrolase superfamily protein|chr4:10130245-10132019 REVERSE LENGTH=397	5e-180	GO:0005975	carbohydrate metabolic process
Glyma.07G222000	1.41432	3.55e-05	NA	NA	NA	NA
Glyma.07G222500	2.48197	5.1e-06	AT4G19840.1|Symbols:ATPP2-A1, ATPP2A-1, PP2-A1|phloem protein 2-A1|chr4:10774336-10775701 FORWARD LENGTH=246	9e-53	GO:0006612 GO:0006833 GO:0009625 GO:0009651 GO:0009750 GO:0009963 GO:0010363	positive regulation of flavonoid biosynthetic process; protein targeting to membrane; regulation of plant-type hypersensitive response; response to fructose stimulus; response to insect; response to salt stress; water transport
Glyma.07G223400	1.39483	0.00436391	AT3G05320.1|Symbols:|O-fucosyltransferase family protein|chr3:1513558-1514895 REVERSE LENGTH=445	0	GO:0008150	biological process
Glyma.07G224100	-2.51438	0.00333311	AT4G33280.1|Symbols:|AP2/B3-like transcriptional factor family protein|chr4:16047357-16049310 REVERSE LENGTH=337	6e-07	GO:0006355	regulation of transcription, DNA-dependent
Glyma.07G224400	-0.939965	0.00240991	AT4G26370.1|Symbols:|antitermination NusB domain-containing protein|chr4:13334099-13336153 REVERSE LENGTH=301	3e-103	GO:0006355 GO:0009073 GO:0010103 GO:0016226 GO:0042793 GO:0045893	aromatic amino acid family biosynthetic process; iron-sulfur cluster assembly; positive regulation of transcription, DNA-dependent; regulation of transcription, DNA-dependent; stomatal complex morphogenesis; transcription from plastid promoter
Glyma.07G225800	1.44673	0.00484974	AT1G18650.1|Symbols:PDCB3|plasmodesmata callose-binding protein 3|chr1:6419036-6420413 REVERSE LENGTH=184	3e-39	GO:0008150	biological process
Glyma.07G228300	-1.05964	0.00915713	AT1G14030.1|Symbols:|Rubisco methyltransferase family protein|chr1:4805493-4807440 REVERSE LENGTH=482	0	GO:0000023 GO:0006655 GO:0009073 GO:0009793 GO:0009902 GO:0010027 GO:0016226 GO:0018023 GO:0019252 GO:0019288 GO:0034660	aromatic amino acid family biosynthetic process; chloroplast relocation; embryo development ending in seed dormancy; iron-sulfur cluster assembly; isopentenyl diphosphate biosynthetic process, mevalonate-independent pathway; maltose metabolic process; ncRNA metabolic process; peptidyl-lysine trimethylation; phosphatidylglycerol biosynthetic process; starch biosynthetic process; thylakoid membrane…
Glyma.07G229200	-2.67204	0.00280379	AT1G26760.1|Symbols:ATXR1, SDG35|SET domain protein 35|chr1:9248304-9249941 REVERSE LENGTH=545	0	GO:0008150	biological process
Glyma.07G233500	-1.27109	0.000153984	AT3G17340.1|Symbols:|ARM repeat superfamily protein|chr3:5920613-5926846 REVERSE LENGTH=1090	0	GO:0000059 GO:0006886	intracellular protein transport; protein import into nucleus, docking
Glyma.07G234800	-1.32987	0.00931002	AT3G57430.1|Symbols:OTP84|Tetratricopeptide repeat (TPR)-like superfamily protein|chr3:21255731-21258403 REVERSE LENGTH=890	3e-157	GO:0031425	chloroplast RNA processing
Glyma.07G236300	-0.776655	0.00696463	AT3G06510.1|Symbols:SFR2, ATSFR2|Glycosyl hydrolase superfamily protein|chr3:2016450-2019533 FORWARD LENGTH=622	0	GO:0000023 GO:0005975 GO:0009409 GO:0019252 GO:0019761 GO:0050826	carbohydrate metabolic process; glucosinolate biosynthetic process; maltose metabolic process; response to cold; response to freezing; starch biosynthetic process
Glyma.07G238400	-2.44571	1.68e-05	AT1G44900.1|Symbols:MCM2, ATMCM2|minichromosome maintenance (MCM2/3/5) family protein|chr1:16970291-16974457 FORWARD LENGTH=936	0	GO:0000911 GO:0006084 GO:0006260 GO:0006261 GO:0006268 GO:0006270 GO:0006275 GO:0006306 GO:0008283 GO:0009165 GO:0009790 GO:0009909 GO:0010082 GO:0034968 GO:0042127 GO:0048364 GO:0051567 GO:0051726	DNA-dependent DNA replication; DNA methylation; DNA replication; DNA replication initiation; DNA unwinding involved in replication; acetyl-CoA metabolic process; cell proliferation; cytokinesis by cell plate formation; embryo development; histone H3-K9 methylation; histone lysine methylation; nucleotide biosynthetic process; regulation of DNA replication; regulation of cell cycle; regulation of c…
Glyma.07G240800	1.37196	5.15e-05	NA	NA	NA	NA
[truncated: 2,117 more rows]

## Sheet: TS4_Root30Min
Table S4. Genes significantly differentially expressed in roots 30 minutes post iron stress. Glyma2.0 ID refers to Glycine max version 2.0 release, data is sorted by Glyma 2.0 ID. For more information see http://www.phytozome.net/soybean.php. The top A. thaliana hit (TAIR version 10) was determined by BLASTP of Glyma2.0 primary proteins against A. thaliana proteins (TAIR10, E<10-6). Gene ontology…
[truncated: 6,524 more rows]

[truncated: 8 more sheets: TS5_Root60Min, TS6_Root120Min, TS7_LeafExpClusters, TS8_RootExpClusters, TS9_LeafClusterGO, TS10_RootClusterGO, TS11_TFExp, TS12_Cannonical Fe]
